# Supplementary material for: Gene-based predictive models of trophic modes suggest Asgard archaea are not phagocytotic
Source: Springer Nature journal article supplement (doi:10.1038/s41559-018-0477-7), 2018-02-16
Supplement: 41559_2018_477_MOESM25_ESM.pdf [file 41559_2018_477_MOESM25_ESM.pdf]

# Extended Data Figure 21

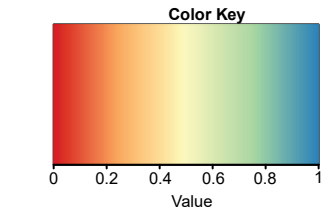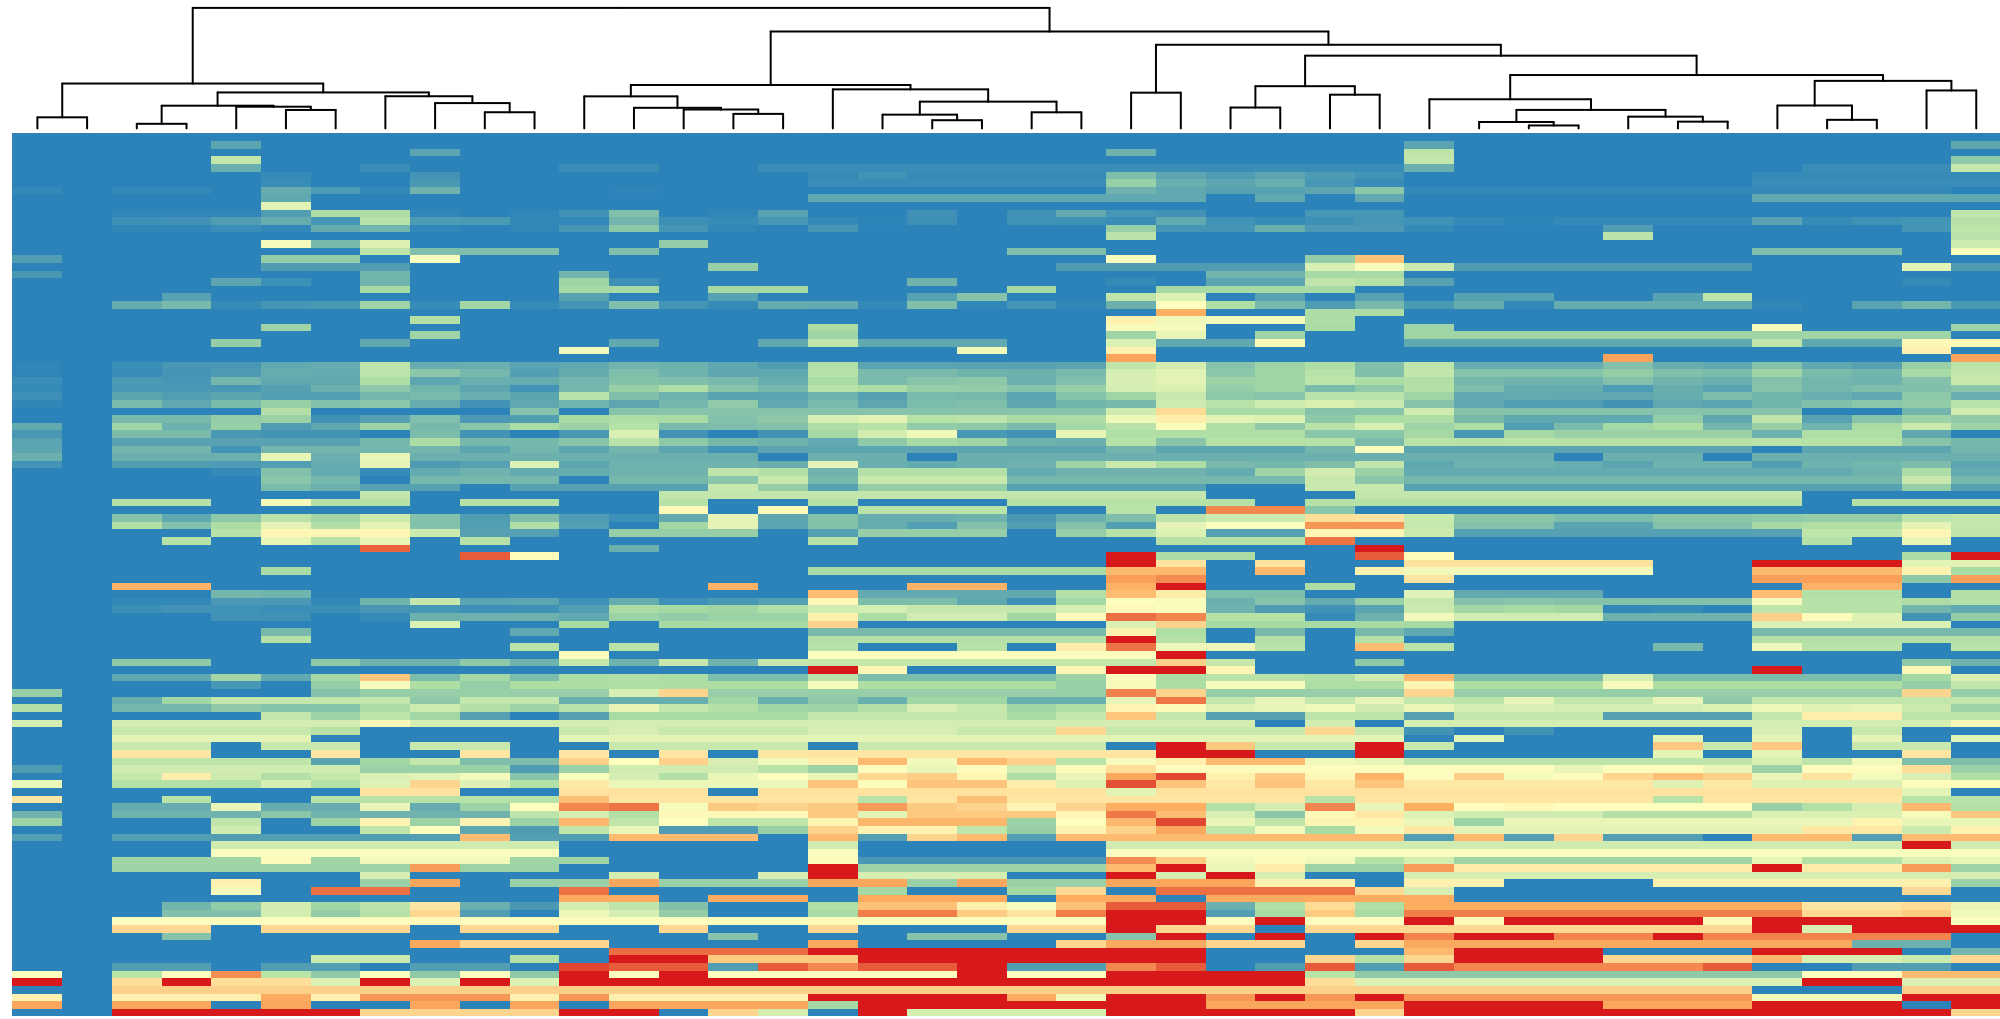

*Dr. melanogaster*  
*Mu. musculus*  
*Acy. subglobosum*  
*Di. discoideum*  
*Th. trahens*  
*Aca. castellani*  
*mantamnad\_sp*  
*Re. filosa*  
*Cym. tetramitiformis*  
*Bi. natans*  
*Prymnesium\_parvum\_TRX*  
*F. alba*  
*Con. coronatus*  
*Ba. dendrobatidis*  
*N. californiae*  
*Rh. irregularis*  
*Phaeodactylum\_tricornutum*  
*Pu. sorghi*  
*Sa. cerevisiae*  
*Sc. pombe*  
*Al. macrogynus*  
*R. allomyces*  
*Cya. merolae*  
*Plasmodium\_faiciparum*  
*Pa. tetraurelia*  
*Te. thermophila*  
*Entamoeba\_histolytica*  
*Trichomonas\_vaginalis*  
*Pi. abies*  
*Br. distachyon*  
*Ar. thaliana*  
*Mi. guttatus*  
*Se. moellendorffii*  
*O. sativa*  
*Ph. patens*  
*Chlorella\_sp.*  
*Chl. reinhardtii*  
*V. carteri*  
*Bo. saltans*  
*Chr. tobin*

GO:0006610 ribosomal protein import into nucleus\_3  
GO:000184 nuclear transcribed mRNA catabolic process\_nonsense mediated decay\_7  
GO:000184 vesicle docking\_9  
GO:0001997 viral transcription\_5  
GO:0001998 hydroxycoupled proton transport\_11  
GO:0001999 membrane fusion\_20  
GO:0002000 protein folding\_21  
GO:0002001 vacuolar organization\_3  
GO:0002002 amyloid organization\_2  
GO:0002003 mature ribosome assembly\_17  
GO:0002004 transition\_74  
GO:0002005 mRNA splicing via spliceosome\_20  
GO:0002006 polysomal small subunit assembly\_5  
GO:0002007 ribosomal small subunit assembly\_6  
GO:0002008 transitional elongation\_8  
GO:0002009 protein folding in endoplasmic reticulum\_4  
GO:0002010 tricarboxylic acid cycle\_8  
GO:0002011 cell redox homeostasis\_8  
GO:0002012 response to cadmium ion\_11  
GO:0002013 NLS bearing protein import into nucleus\_4  
GO:0002014 response to calcium ion  
GO:0002015 regulation of transcription\_19  
GO:0002016 regulation of SRE  
GO:0002017 telomere determination\_4  
GO:0002018 telomere determination\_4 complex assembly\_3  
GO:0002019 cortical actin cytoskeleton organization\_6  
GO:0002020 actin packing behavior  
GO:0002021 mRNA 5' splice site recognition\_2  
GO:0002022 intracellular protein transport\_86  
GO:0002023 cellular protein localization\_87  
GO:0002024 protein transport\_112  
GO:0002025 vesicle mediated transport\_87  
GO:0002026 protein transport\_112  
GO:0002027 protein targeting to vacuole\_9  
GO:0002028 endocytosis\_28  
GO:0002029 positive regulation of gene expression\_27  
GO:0002030 cellular calcium ion homeostasis  
GO:0002031 regulation of protein catabolic process\_8  
GO:0002032 regulation of RNA splicing  
GO:0002033 removal of superoxide radicals\_4  
GO:0002034 lipid transport\_16  
GO:0002035 glucose release  
GO:0002036 glycolysis\_11  
GO:0002037 negative chemotaxis\_3  
GO:0002038 embryonic axis specification\_3  
GO:0002039 osmotic salinity response\_3  
GO:0002040 ATP metabolic process\_36  
GO:0002041 ATP synthase coupled proton transport\_11  
GO:0002042 Golgi organization\_6  
GO:0002043 protein import into mitochondrial matrix\_5  
GO:0002044 chaperone mediated protein transport\_2  
GO:0002045 attachment of GTP anchor to protein\_4  
GO:0002046 positive regulation of synaptic growth at neuromuscular junction\_2  
GO:0002047 terminal button organization\_3  
GO:0002048 barbed end actin filament capping\_3  
GO:0002049 progesterone biosynthetic process\_3  
GO:0002050 Arp2/3 complex mediated actin nucleation\_6  
GO:0002051 cell growth\_27  
GO:0002052 actin filament polymerization\_16  
GO:0002053 root epidermal cell differentiation\_4  
GO:0002054 endosome to lysosome transport\_4  
GO:0002055 late endosome to lysosome transport\_2  
GO:0002056 stem cell division\_5  
GO:0002057 positive regulation of cardiac muscle hypertrophy\_2  
GO:0002058 neutrophil degranulation\_5  
GO:0002059 actin crosslink formation\_2  
GO:0002060 protein targeting to ER\_17  
GO:0002061 SRE development transcriptional protein targeting to membrane\_8  
GO:0002062 retrograde transport endosome to plasma membrane\_4  
GO:0002063 positive regulation of protein secretion\_5  
GO:0002064 apoptotic signaling pathway\_16  
GO:0002065 endosome organization\_6  
GO:0002066 ribosomal large subunit assembly\_5  
GO:0002067 cellular response to interferon\_4\_4  
GO:0002068 collagen catabolic process  
GO:0002069 positive regulation of calcium import into nucleus\_2  
GO:0002070 positive regulation of epithelial to mesenchymal transition\_2  
GO:0002071 receptor mediated signaling\_9  
GO:0002072 receptor mediated signaling\_9  
GO:0002073 regulation of protein kinase activity\_16  
GO:0002074 lysosome organization  
GO:0002075 cellular response to low density lipoprotein particle stimulus\_2  
GO:0002076 neuromuscular process controlling balance\_4  
GO:0002077 myeloid cell differentiation\_7  
GO:0002078 lysosomal transport\_9  
GO:0002079 glucose homeostasis\_6  
GO:0002080 positive regulation of MAPK cascade\_8  
GO:0002081 hydrogen peroxide catabolic process\_3  
GO:0002082 protein retention in Golgi apparatus\_2  
GO:0002083 Golgi vesicle budding\_2  
GO:0002084 late endosome to vacuole transport\_7  
GO:0002085 regulation of Rho protein signal transduction\_5  
GO:0002086 cytoskeletal anchoring at plasma membrane  
GO:0002087 adenylate cyclase inhibiting G protein coupled receptor signaling pathway\_3  
GO:0002088 cell growth\_27  
GO:0002089 collagen fibril organization  
GO:0002090 positive regulation of IGF1 signaling\_7  
GO:0002091 positive regulation of amino acid stimulus\_5  
GO:0002092 positive regulation of tumor necrosis factor production\_2  
GO:0002093 regulation of lamellipodium assembly\_2  
GO:0002094 muscle filament sliding\_2  
GO:0002095 chemotaxis to cAMP\_8  
GO:0002096 phagosome reformation\_3  
GO:0002097 protein localization to lysosome\_3  
GO:0002098 chylomicron receptor cell differentiation\_3  
GO:0002099 oligosaccharide catabolic process\_3  
GO:0002100 galactoside catabolic process  
GO:0002101 cellular copper ion homeostasis\_2  
GO:0002102 lysosome localization\_3  
GO:1904925 positive regulation of mitophagy in response to mitochondrial depolarization\_2
