# Supplementary material for: Gene-based predictive models of trophic modes suggest Asgard archaea are not phagocytotic
Source: Springer Nature journal article supplement (doi:10.1038/s41559-018-0477-7), 2018-02-16
Supplement: 41559_2018_477_MOESM26_ESM.pdf [file 41559_2018_477_MOESM26_ESM.pdf]

Extended Data Figure 22

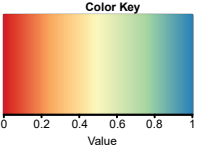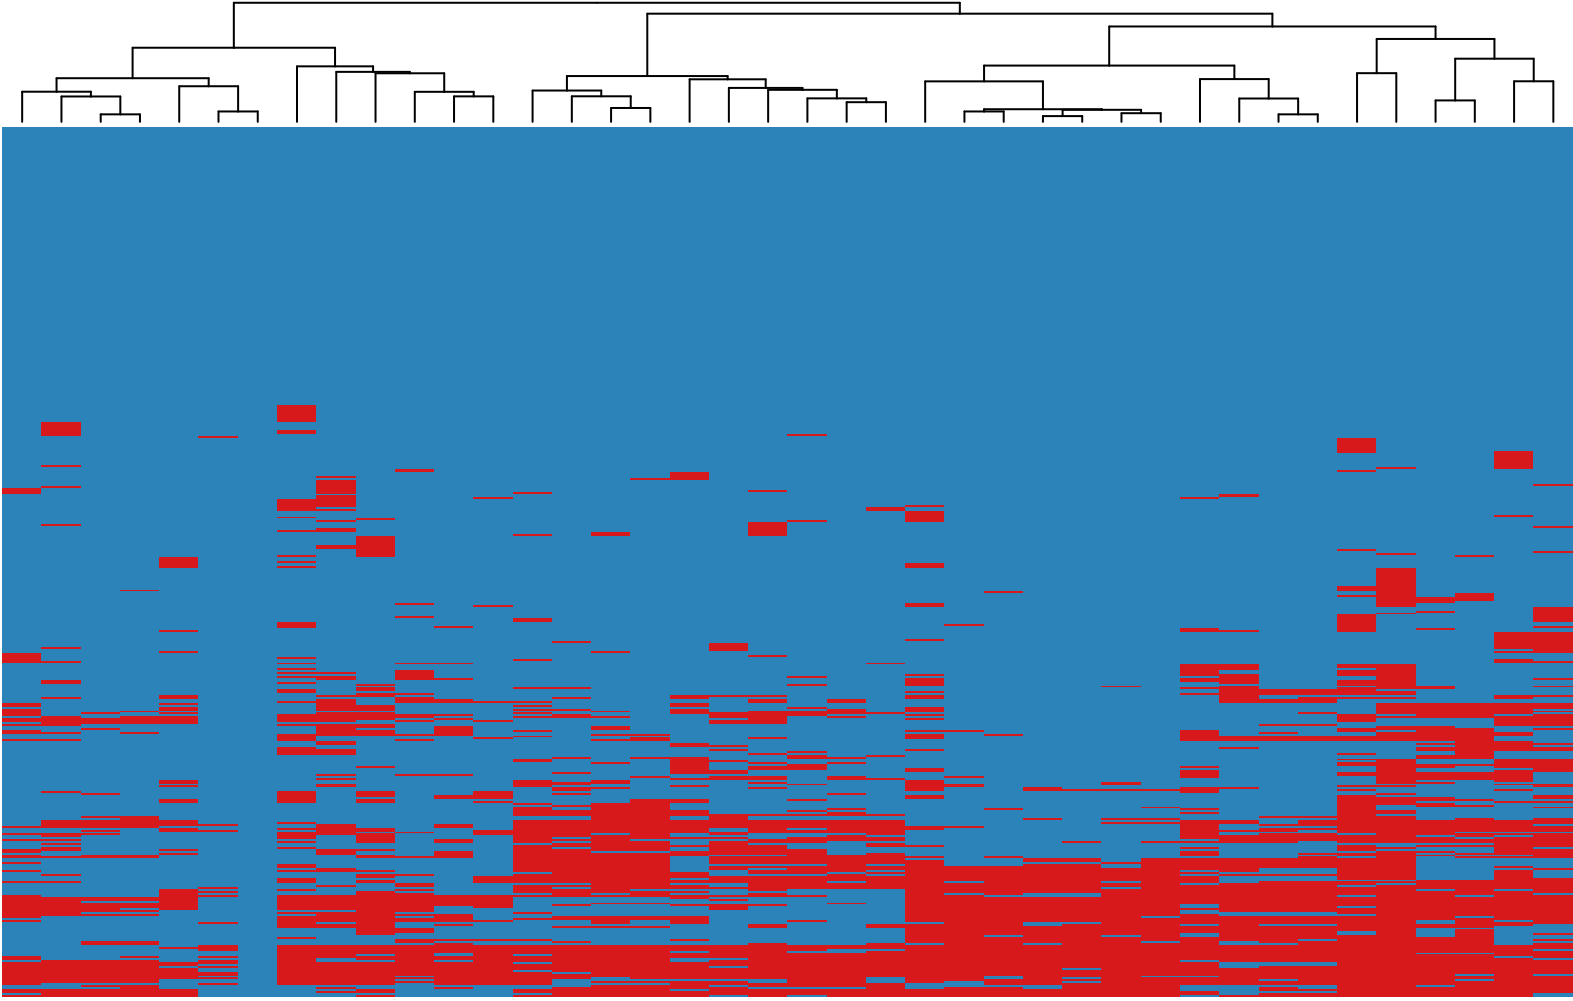

*mantamonad\_sp*  
*Aca. castellani*  
*Acy. subglobosum*  
*Di. discoideum*  
*Th. trahens*  
*Dr. melanogaster*  
*Mu. musculus*  
*Chr. tobin*  
*Re. filosa*  
*Bo. saltans*  
*Cym. tetramitiformis*  
*Bi. natans*  
*Prymnesium\_parvum\_TRX*  
*R. allomyces*  
*Pu. sorghi*  
*Sa. cerevisiae*  
*Sc. pombe*  
*F. alba*  
*N. californiae*  
*Con. coronatus*  
*Ba. dendrobatidis*  
*Al. macrogynus*  
*Rh. irregularis*  
*Pi. abies*  
*Se. moellendorffii*  
*Ph. patens*  
*Ar. thaliana*  
*Mi. guttatus*  
*O. sativa*  
*Br. distachyon*  
*Phaeodactylum\_tricornutum*  
*Chlorella sp.*  
*Chl. reinhardtii*  
*V. carteri*  
*Cya. merolae*  
*Plasmodium\_falciparum*  
*Pa. tetraurelia*  
*Te. thermophila*  
*Entamoeba\_histolytica*  
*Trichomonas\_vaginalis*
