# Supplementary figures and images for: Gene-based predictive models of trophic modes suggest Asgard archaea are not phagocytotic
Source: Springer Nature journal article supplement (doi:10.1038/s41559-018-0477-7), 2018-02-16

Extended Data Figure 6

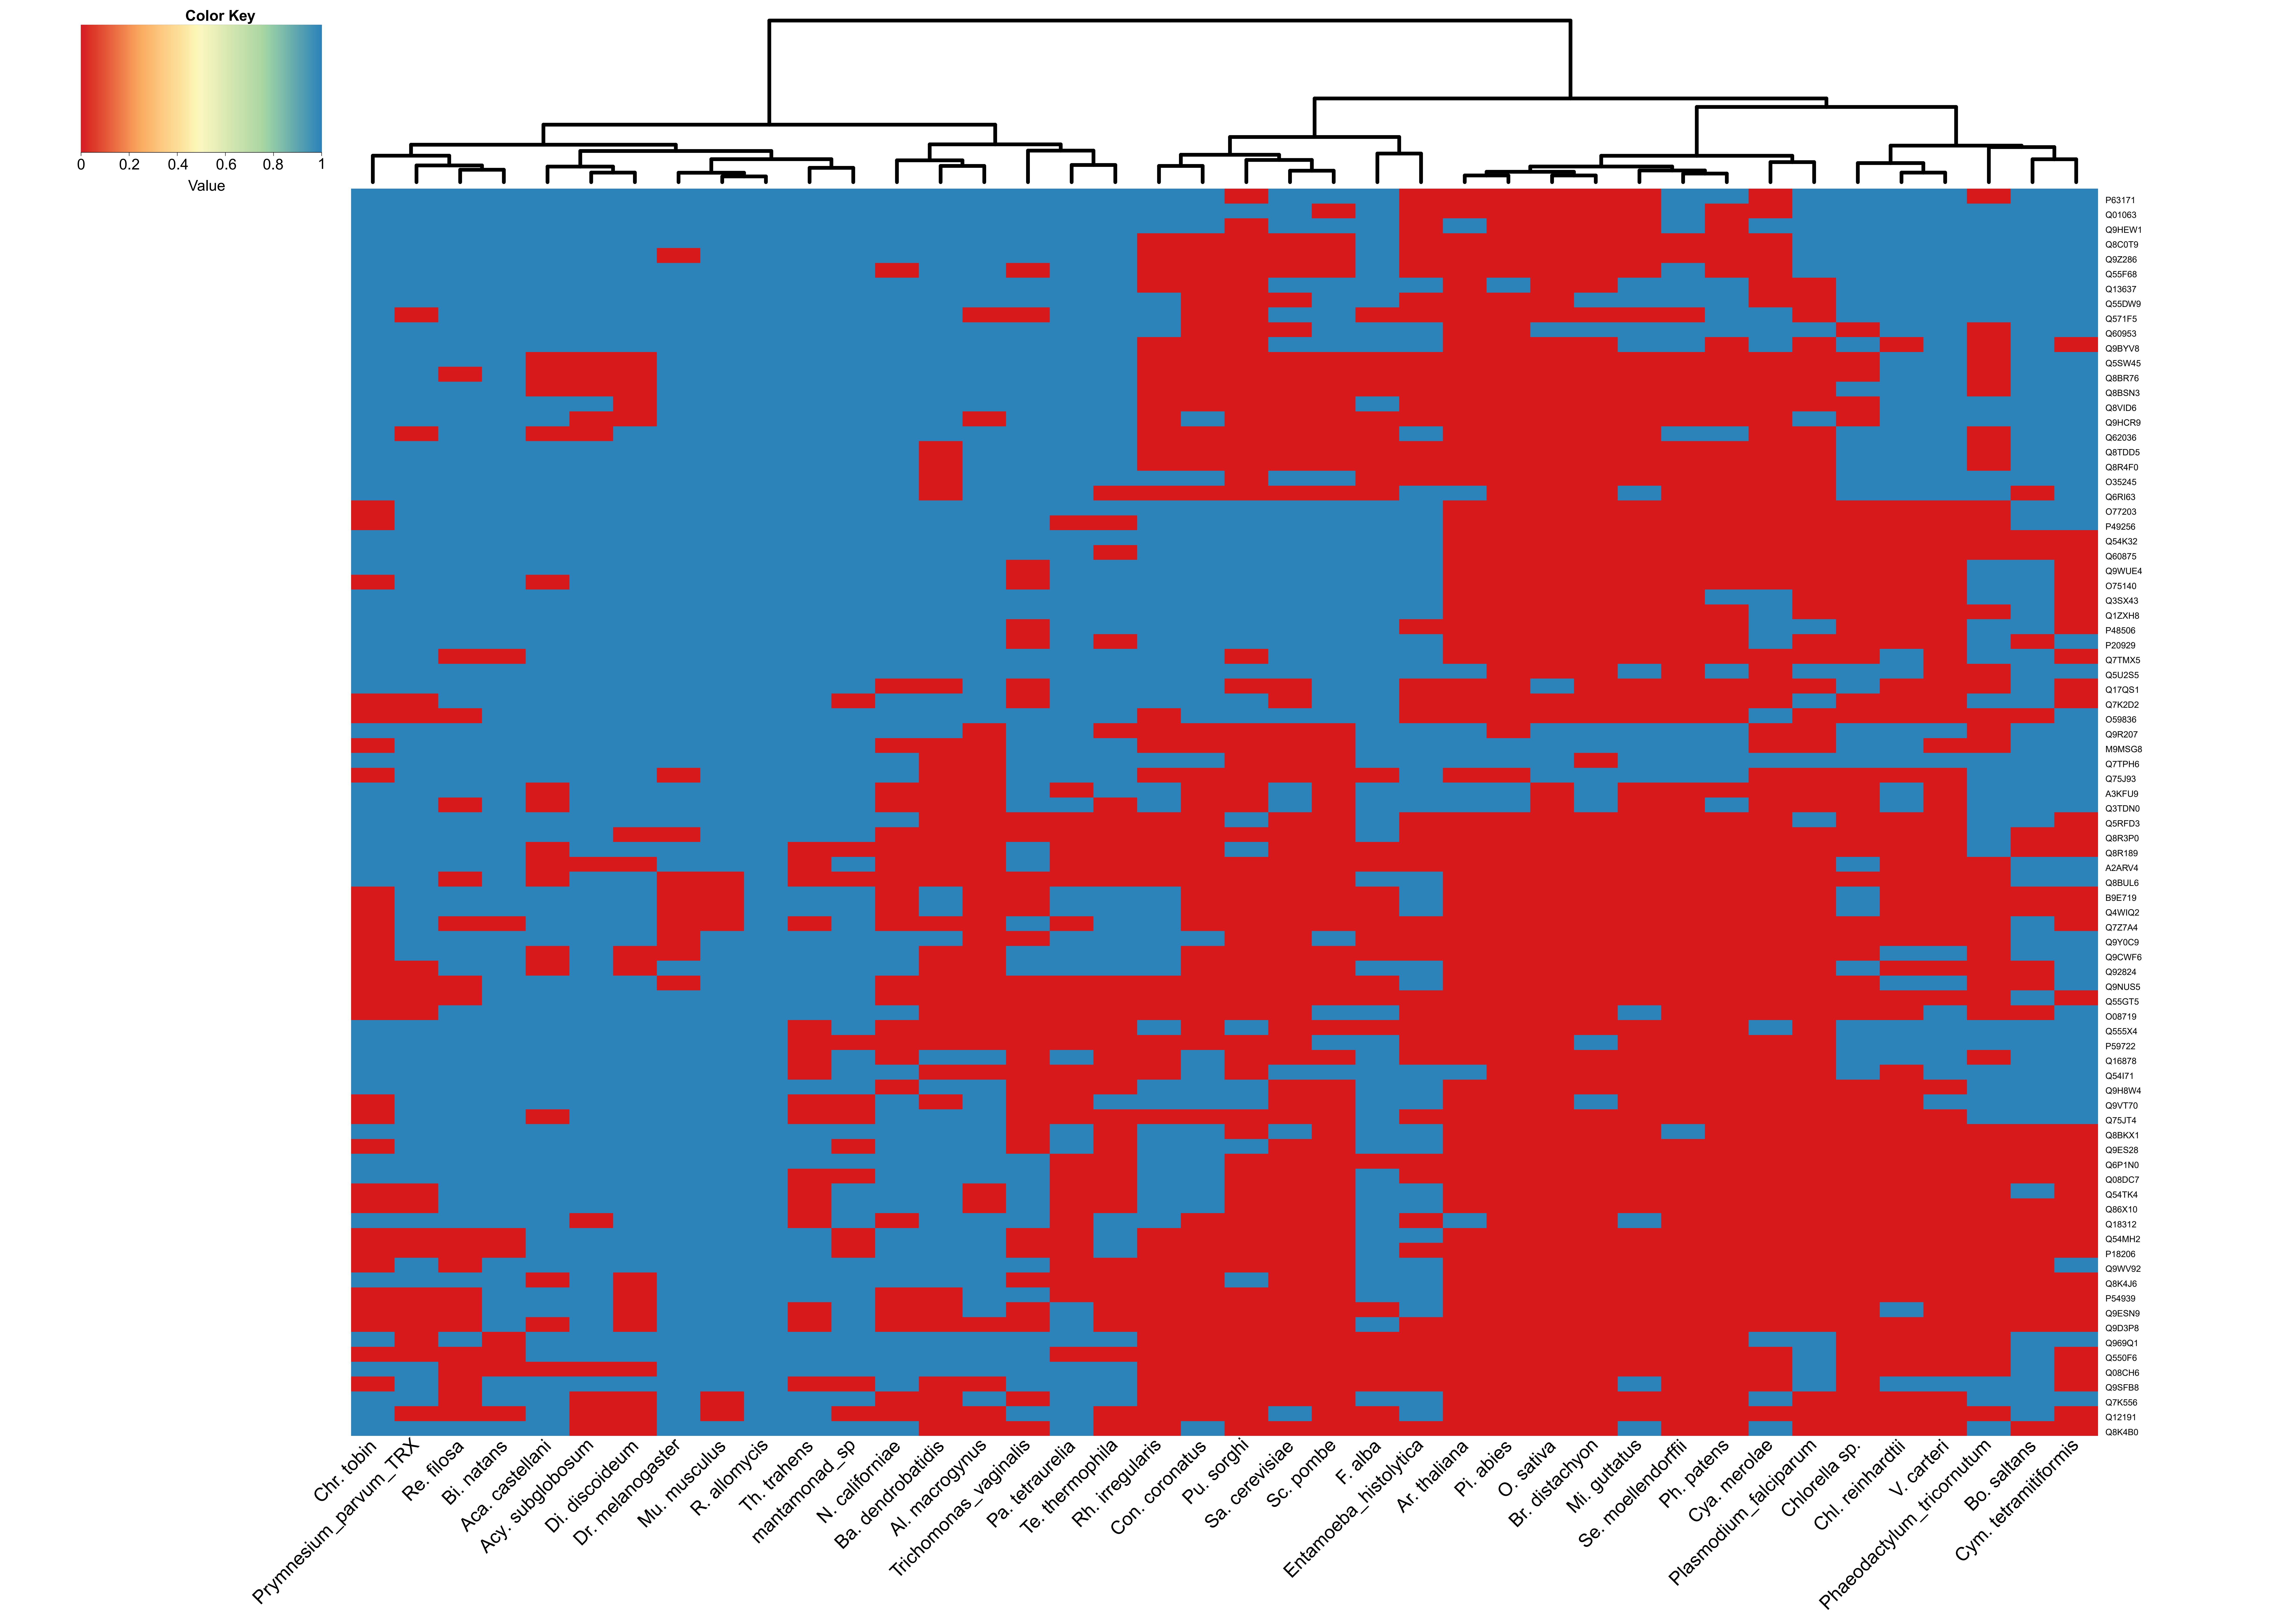

Supplement: 41559_2018_477_MOESM10_ESM.pdf [file 41559_2018_477_MOESM10_ESM.pdf]

Extended Data Figure 7

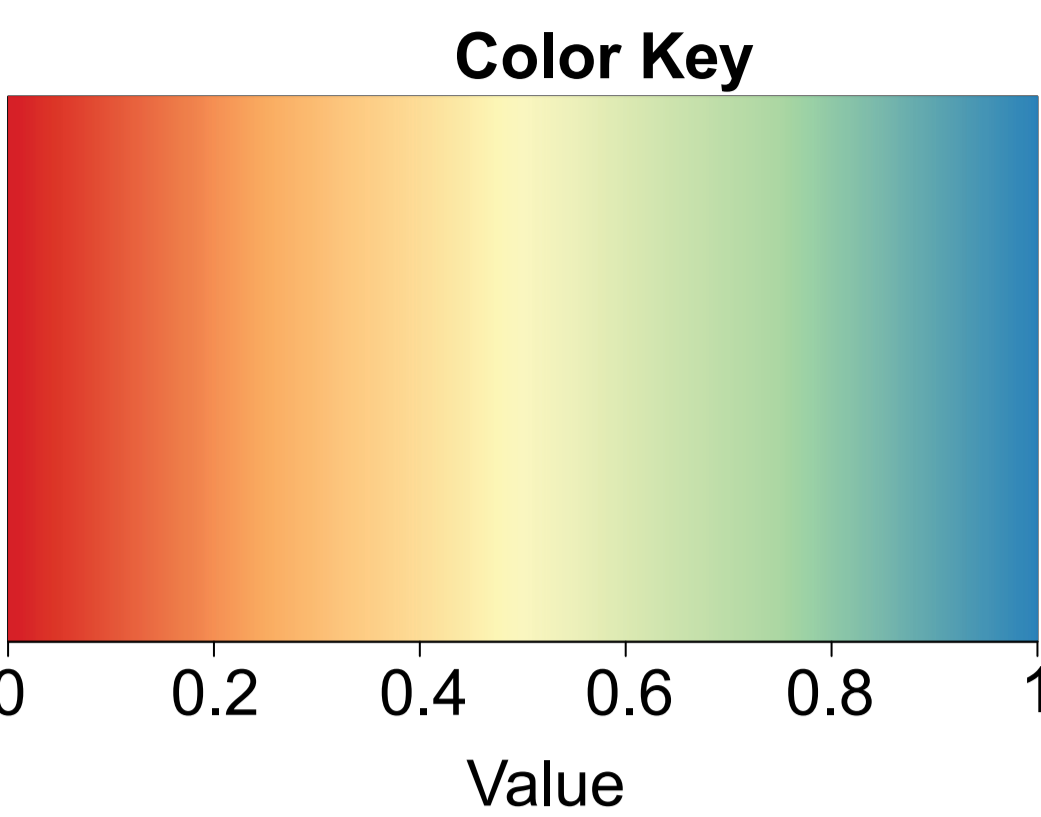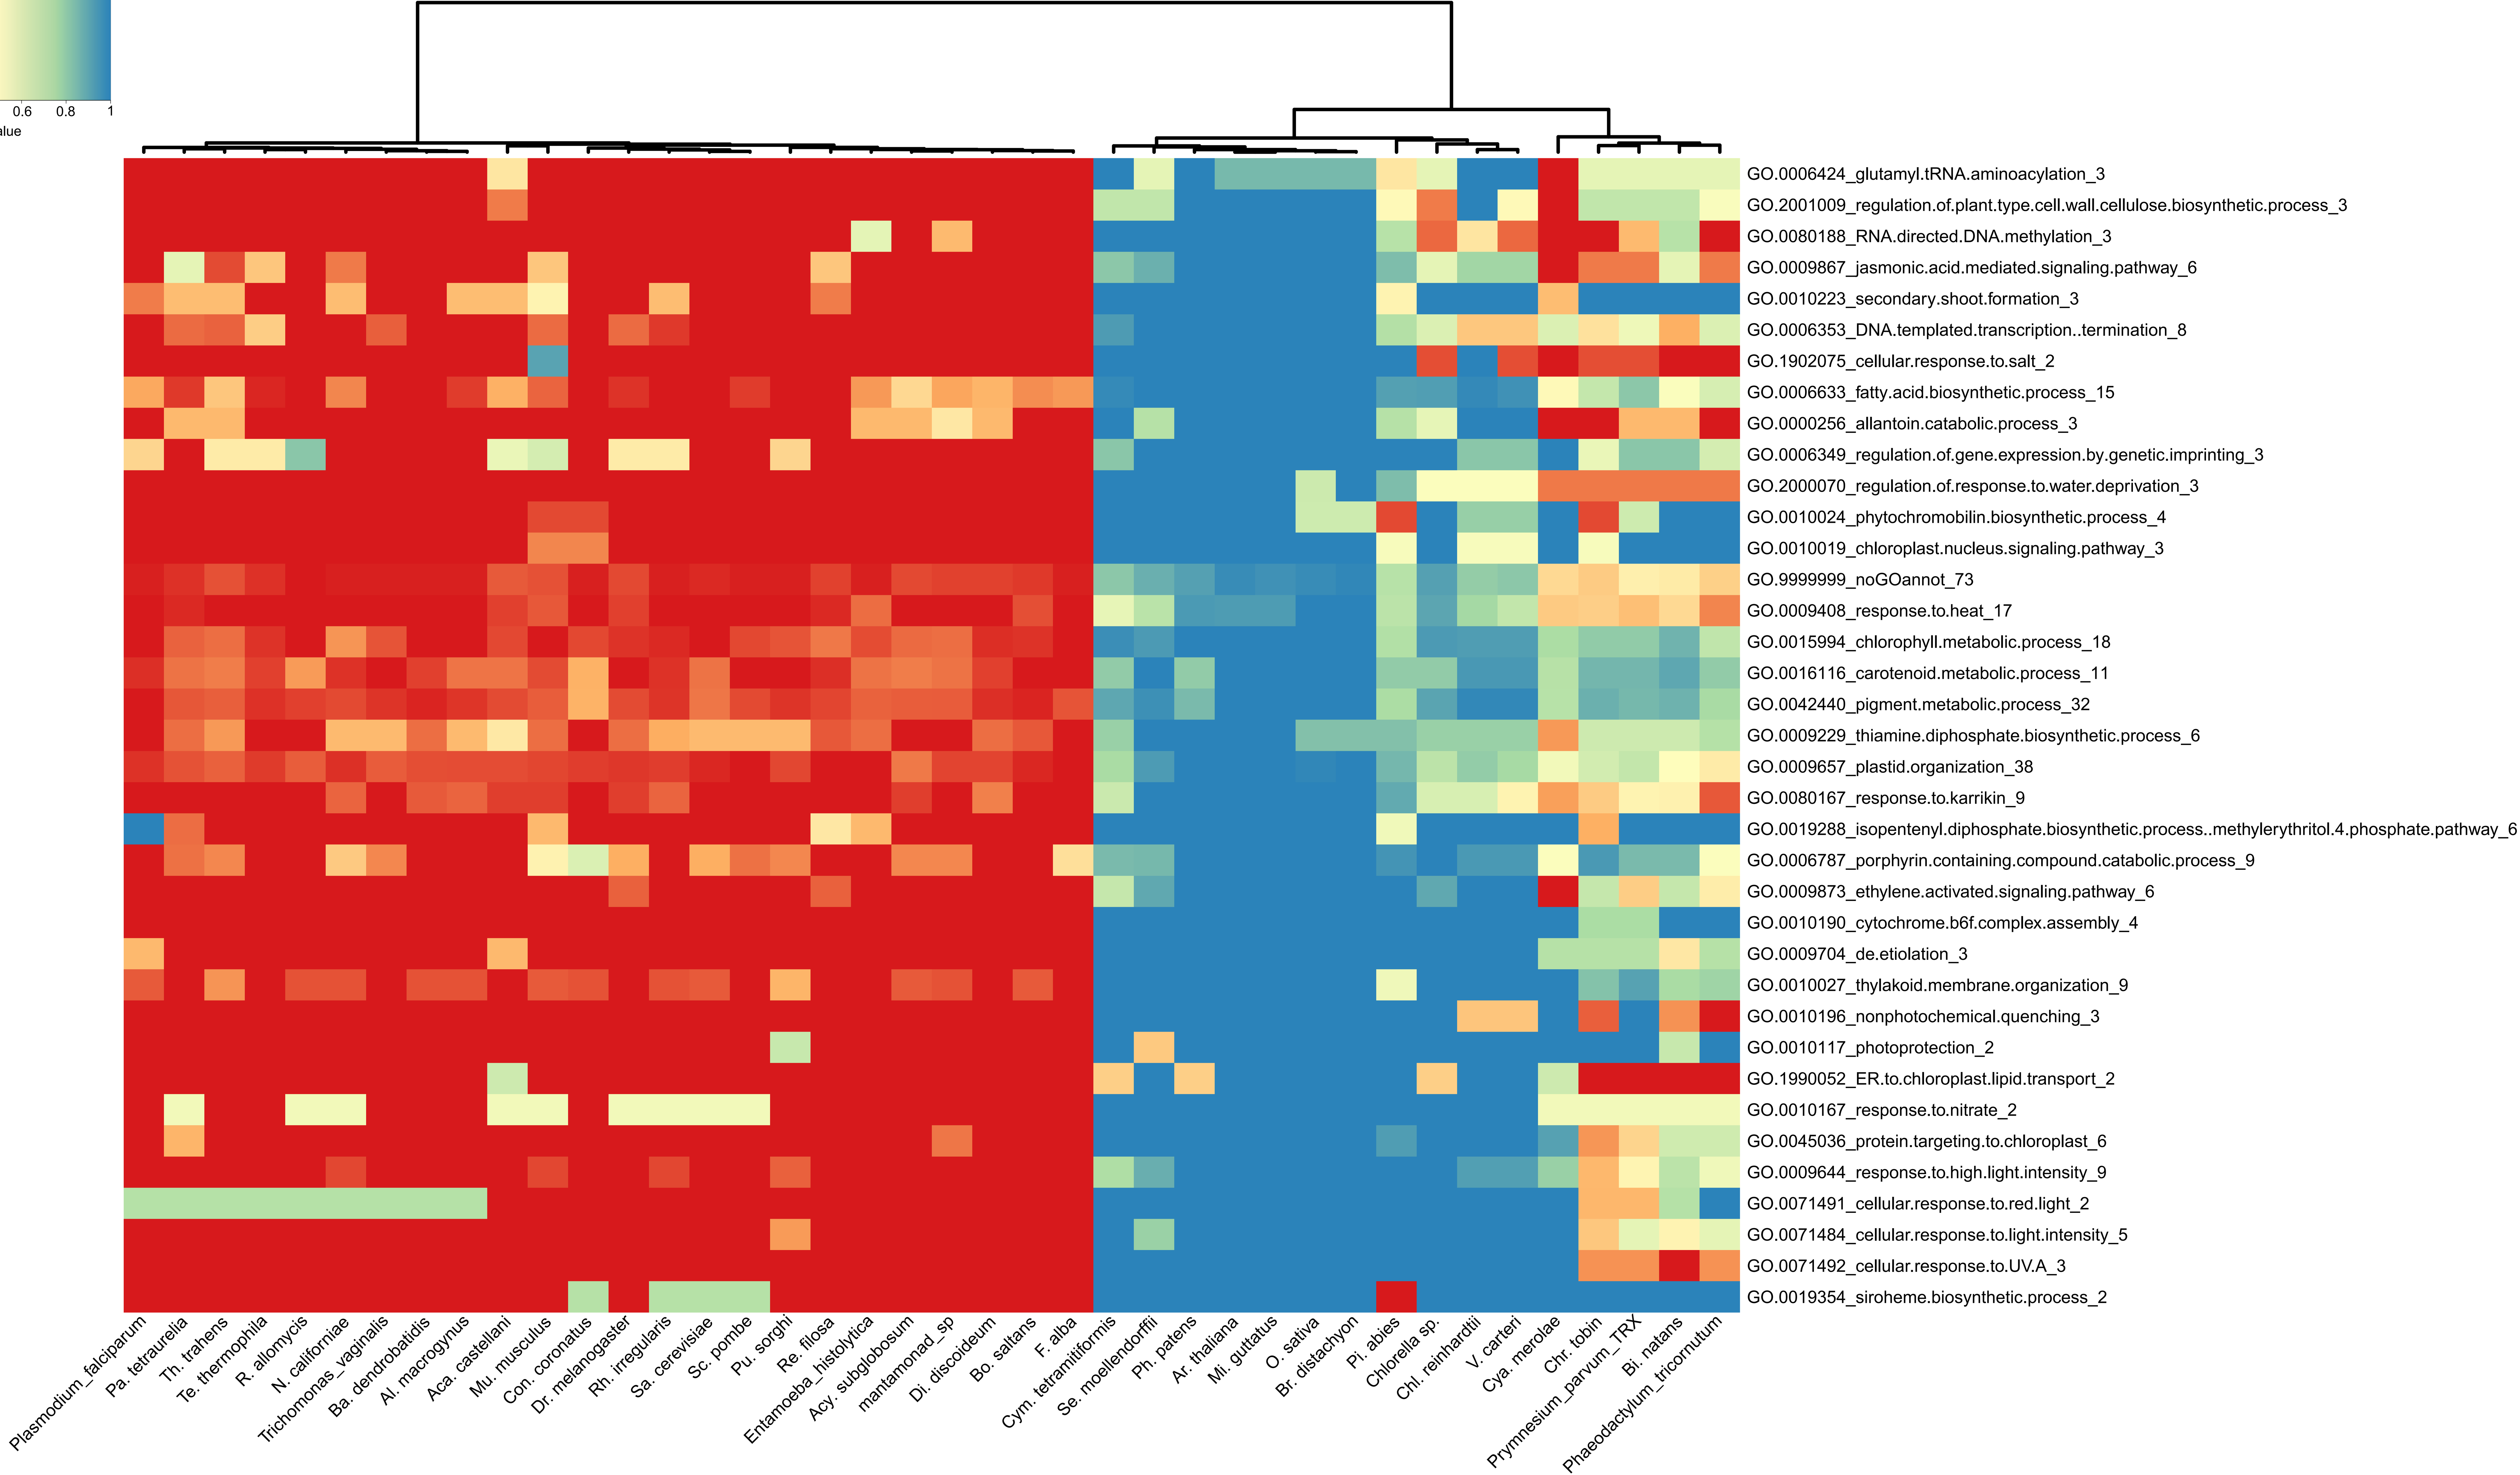

Supplement: 41559_2018_477_MOESM11_ESM.pdf [file 41559_2018_477_MOESM11_ESM.pdf]

Extended Data Figure 8

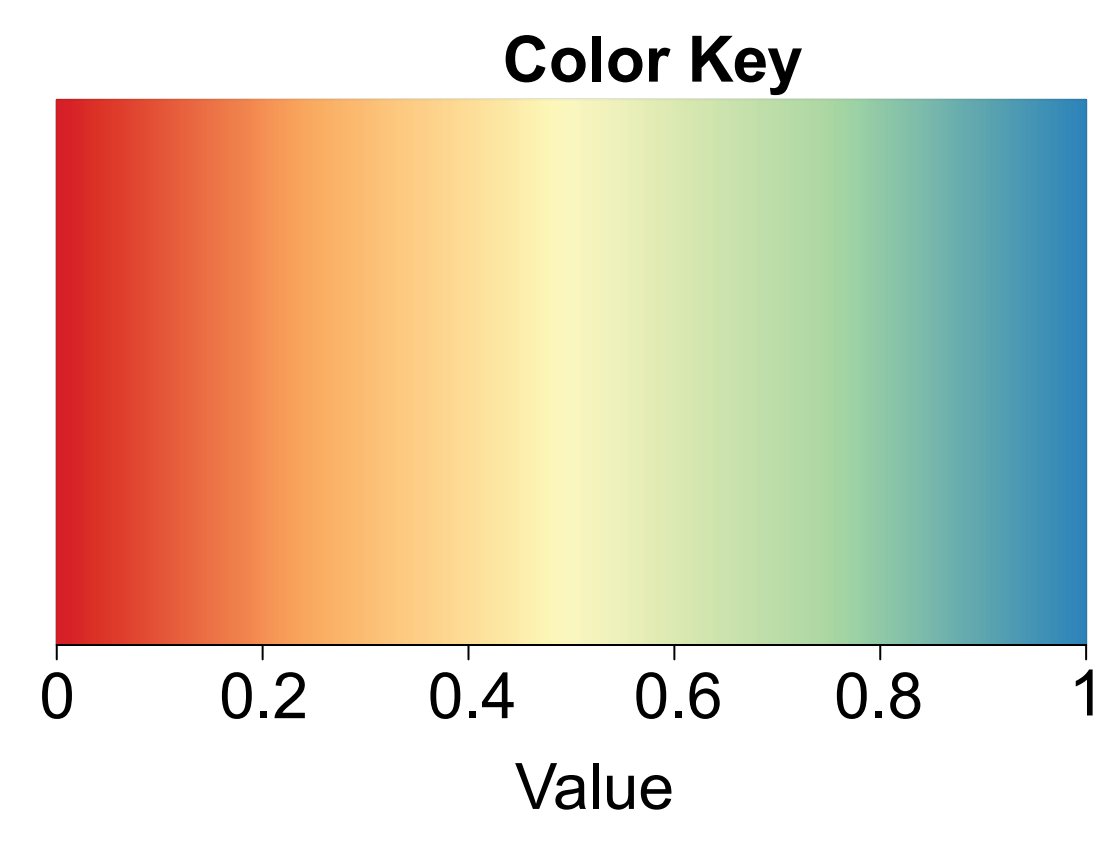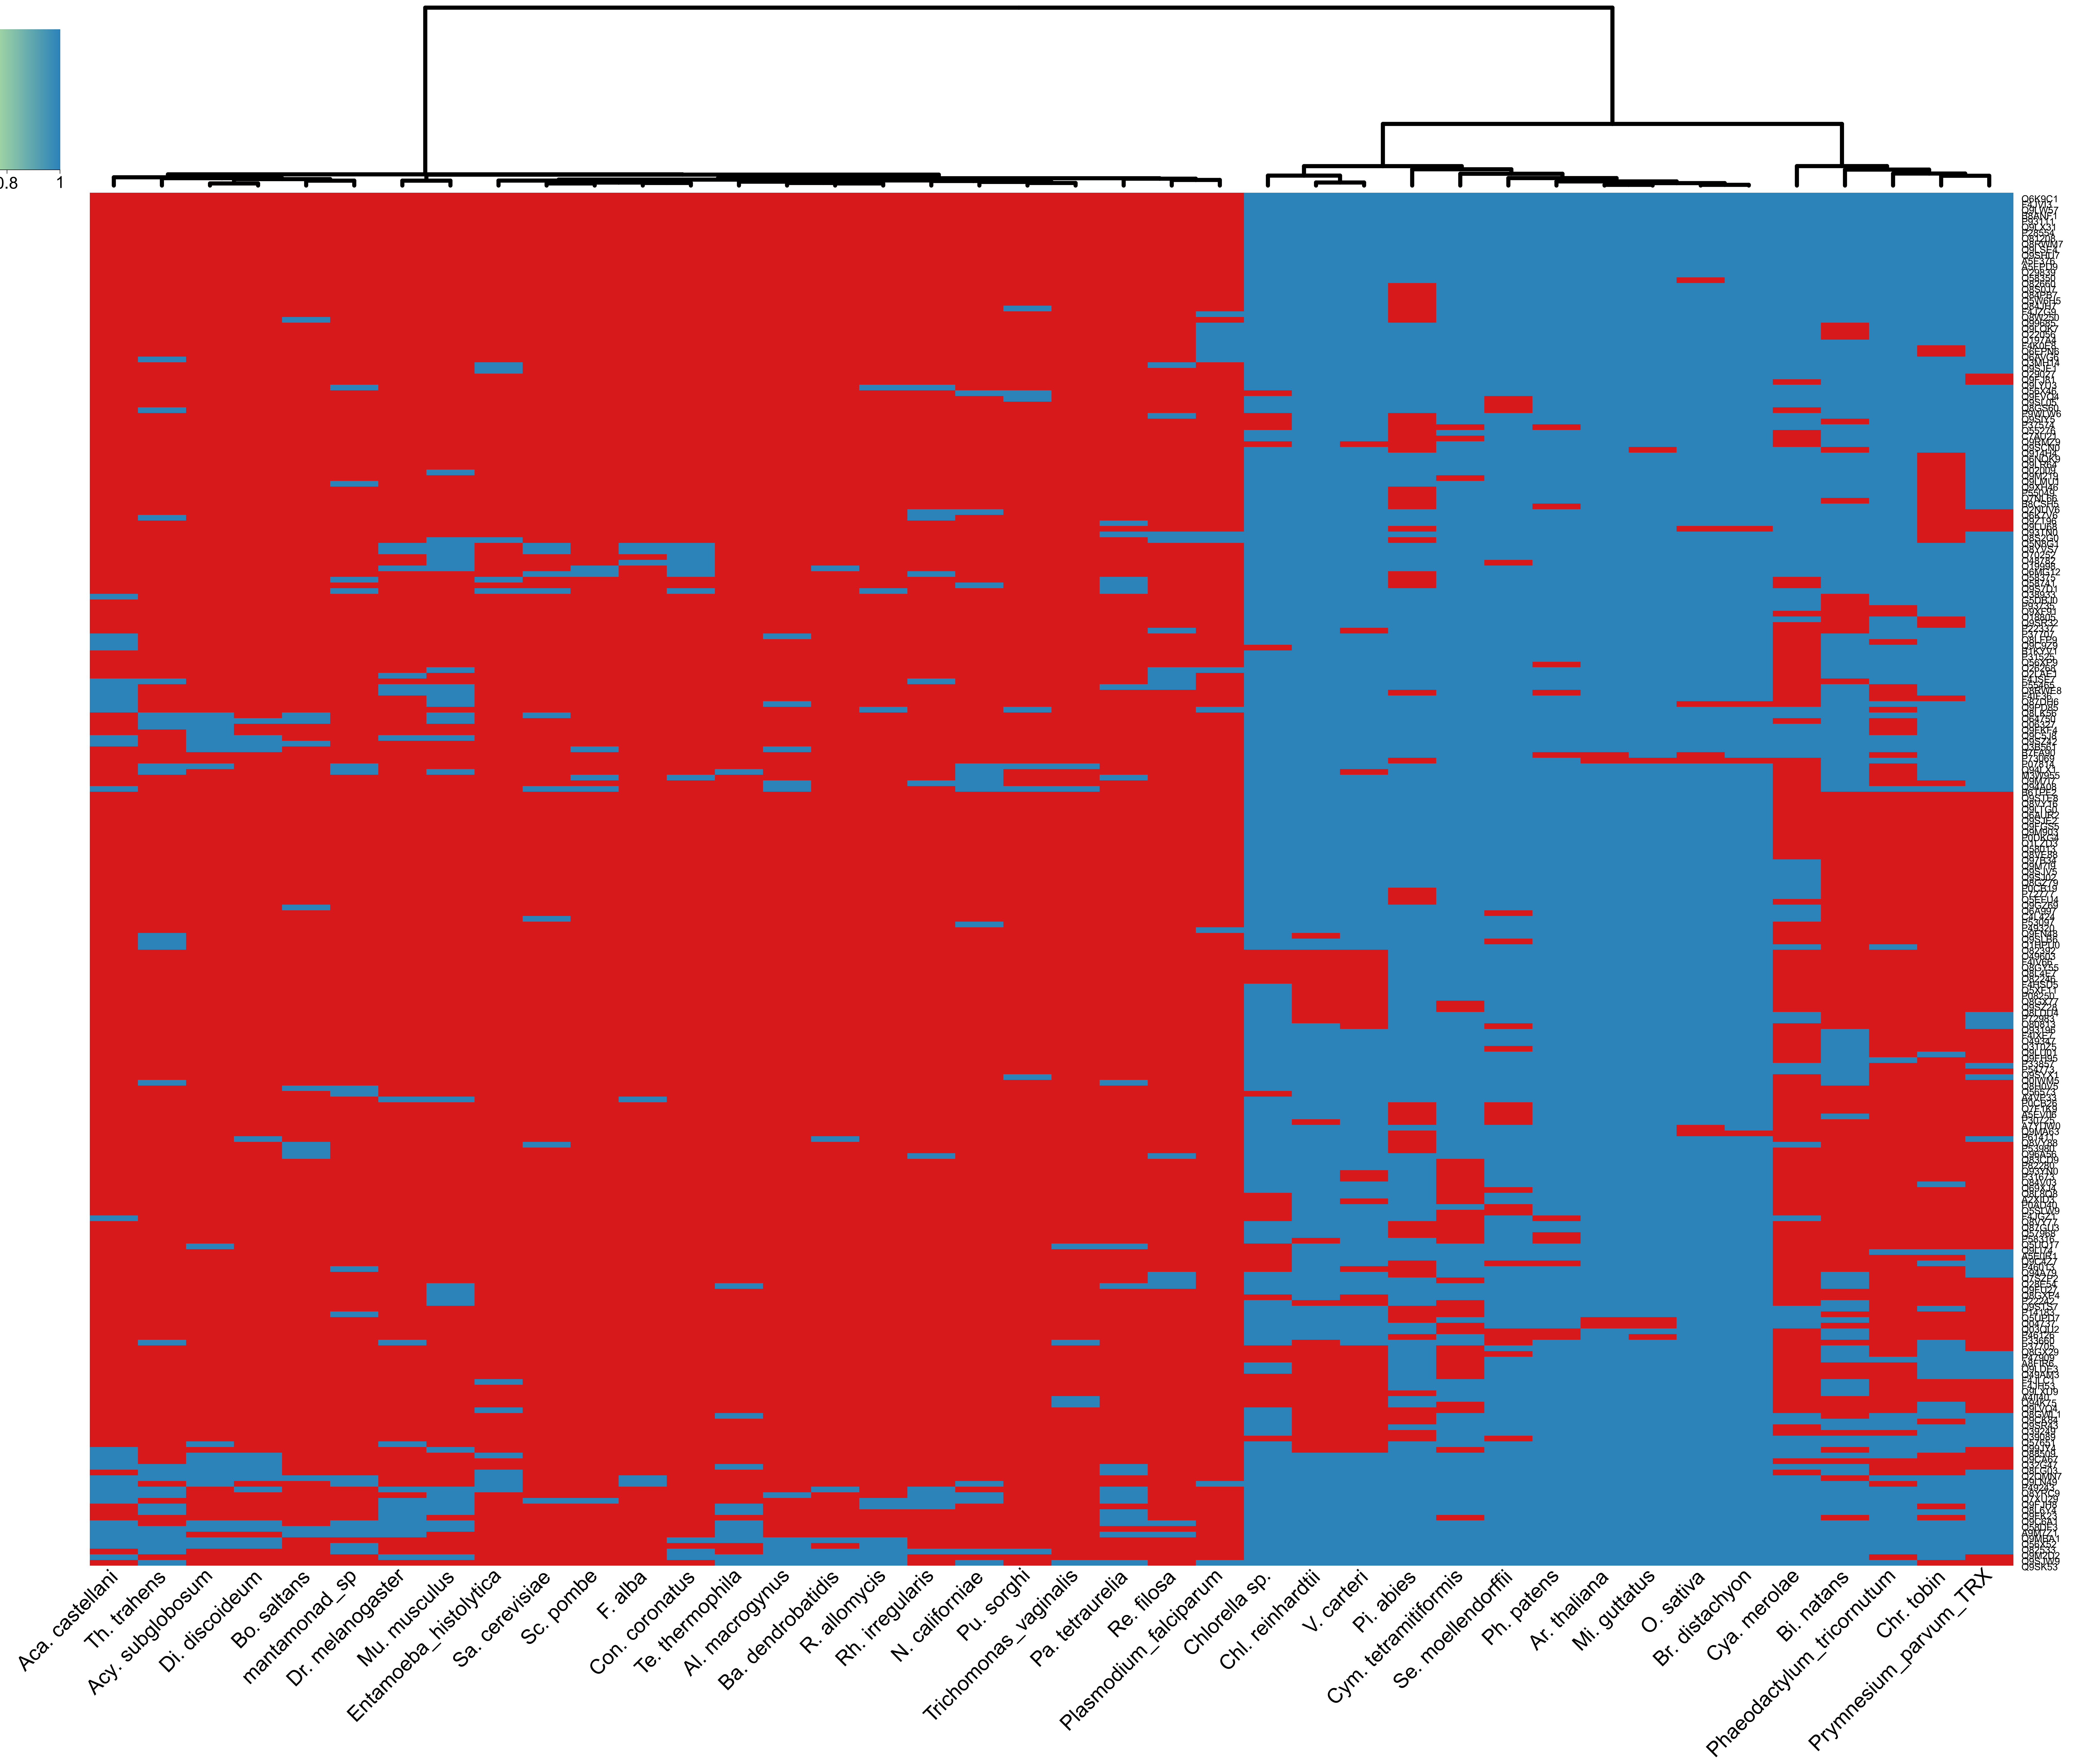

Supplement: 41559_2018_477_MOESM12_ESM.pdf [file 41559_2018_477_MOESM12_ESM.pdf]

Extended Data Figure 9

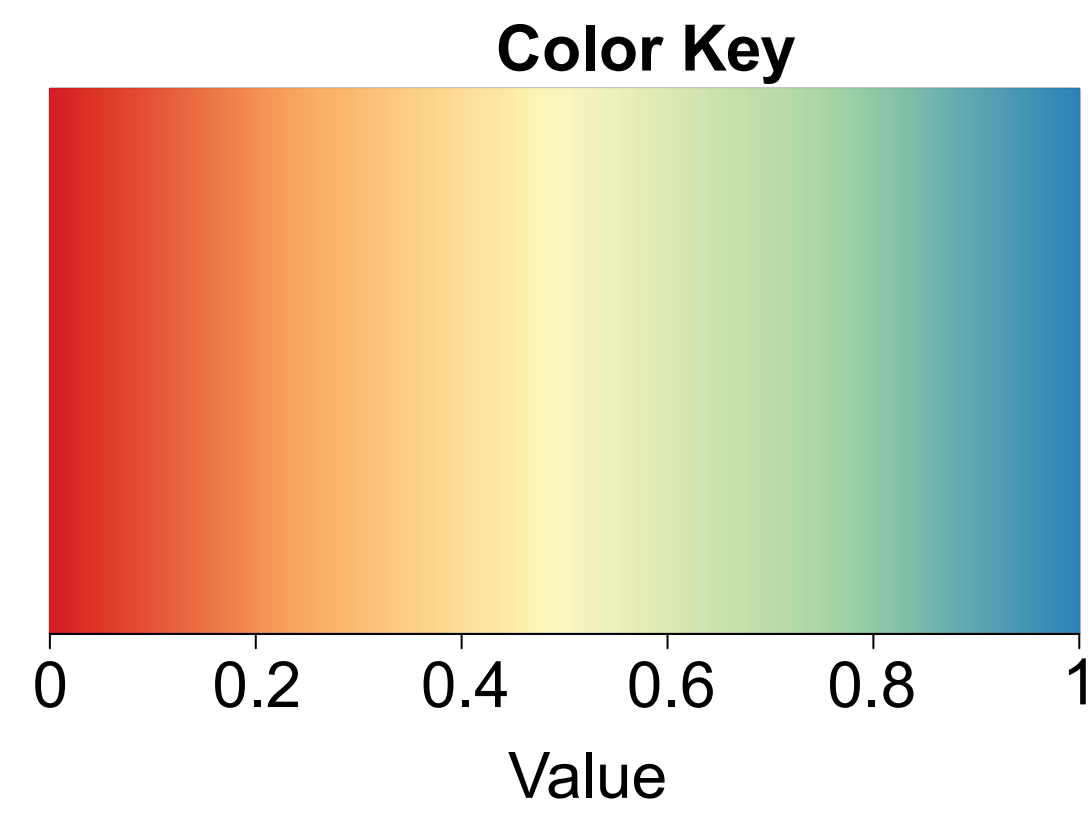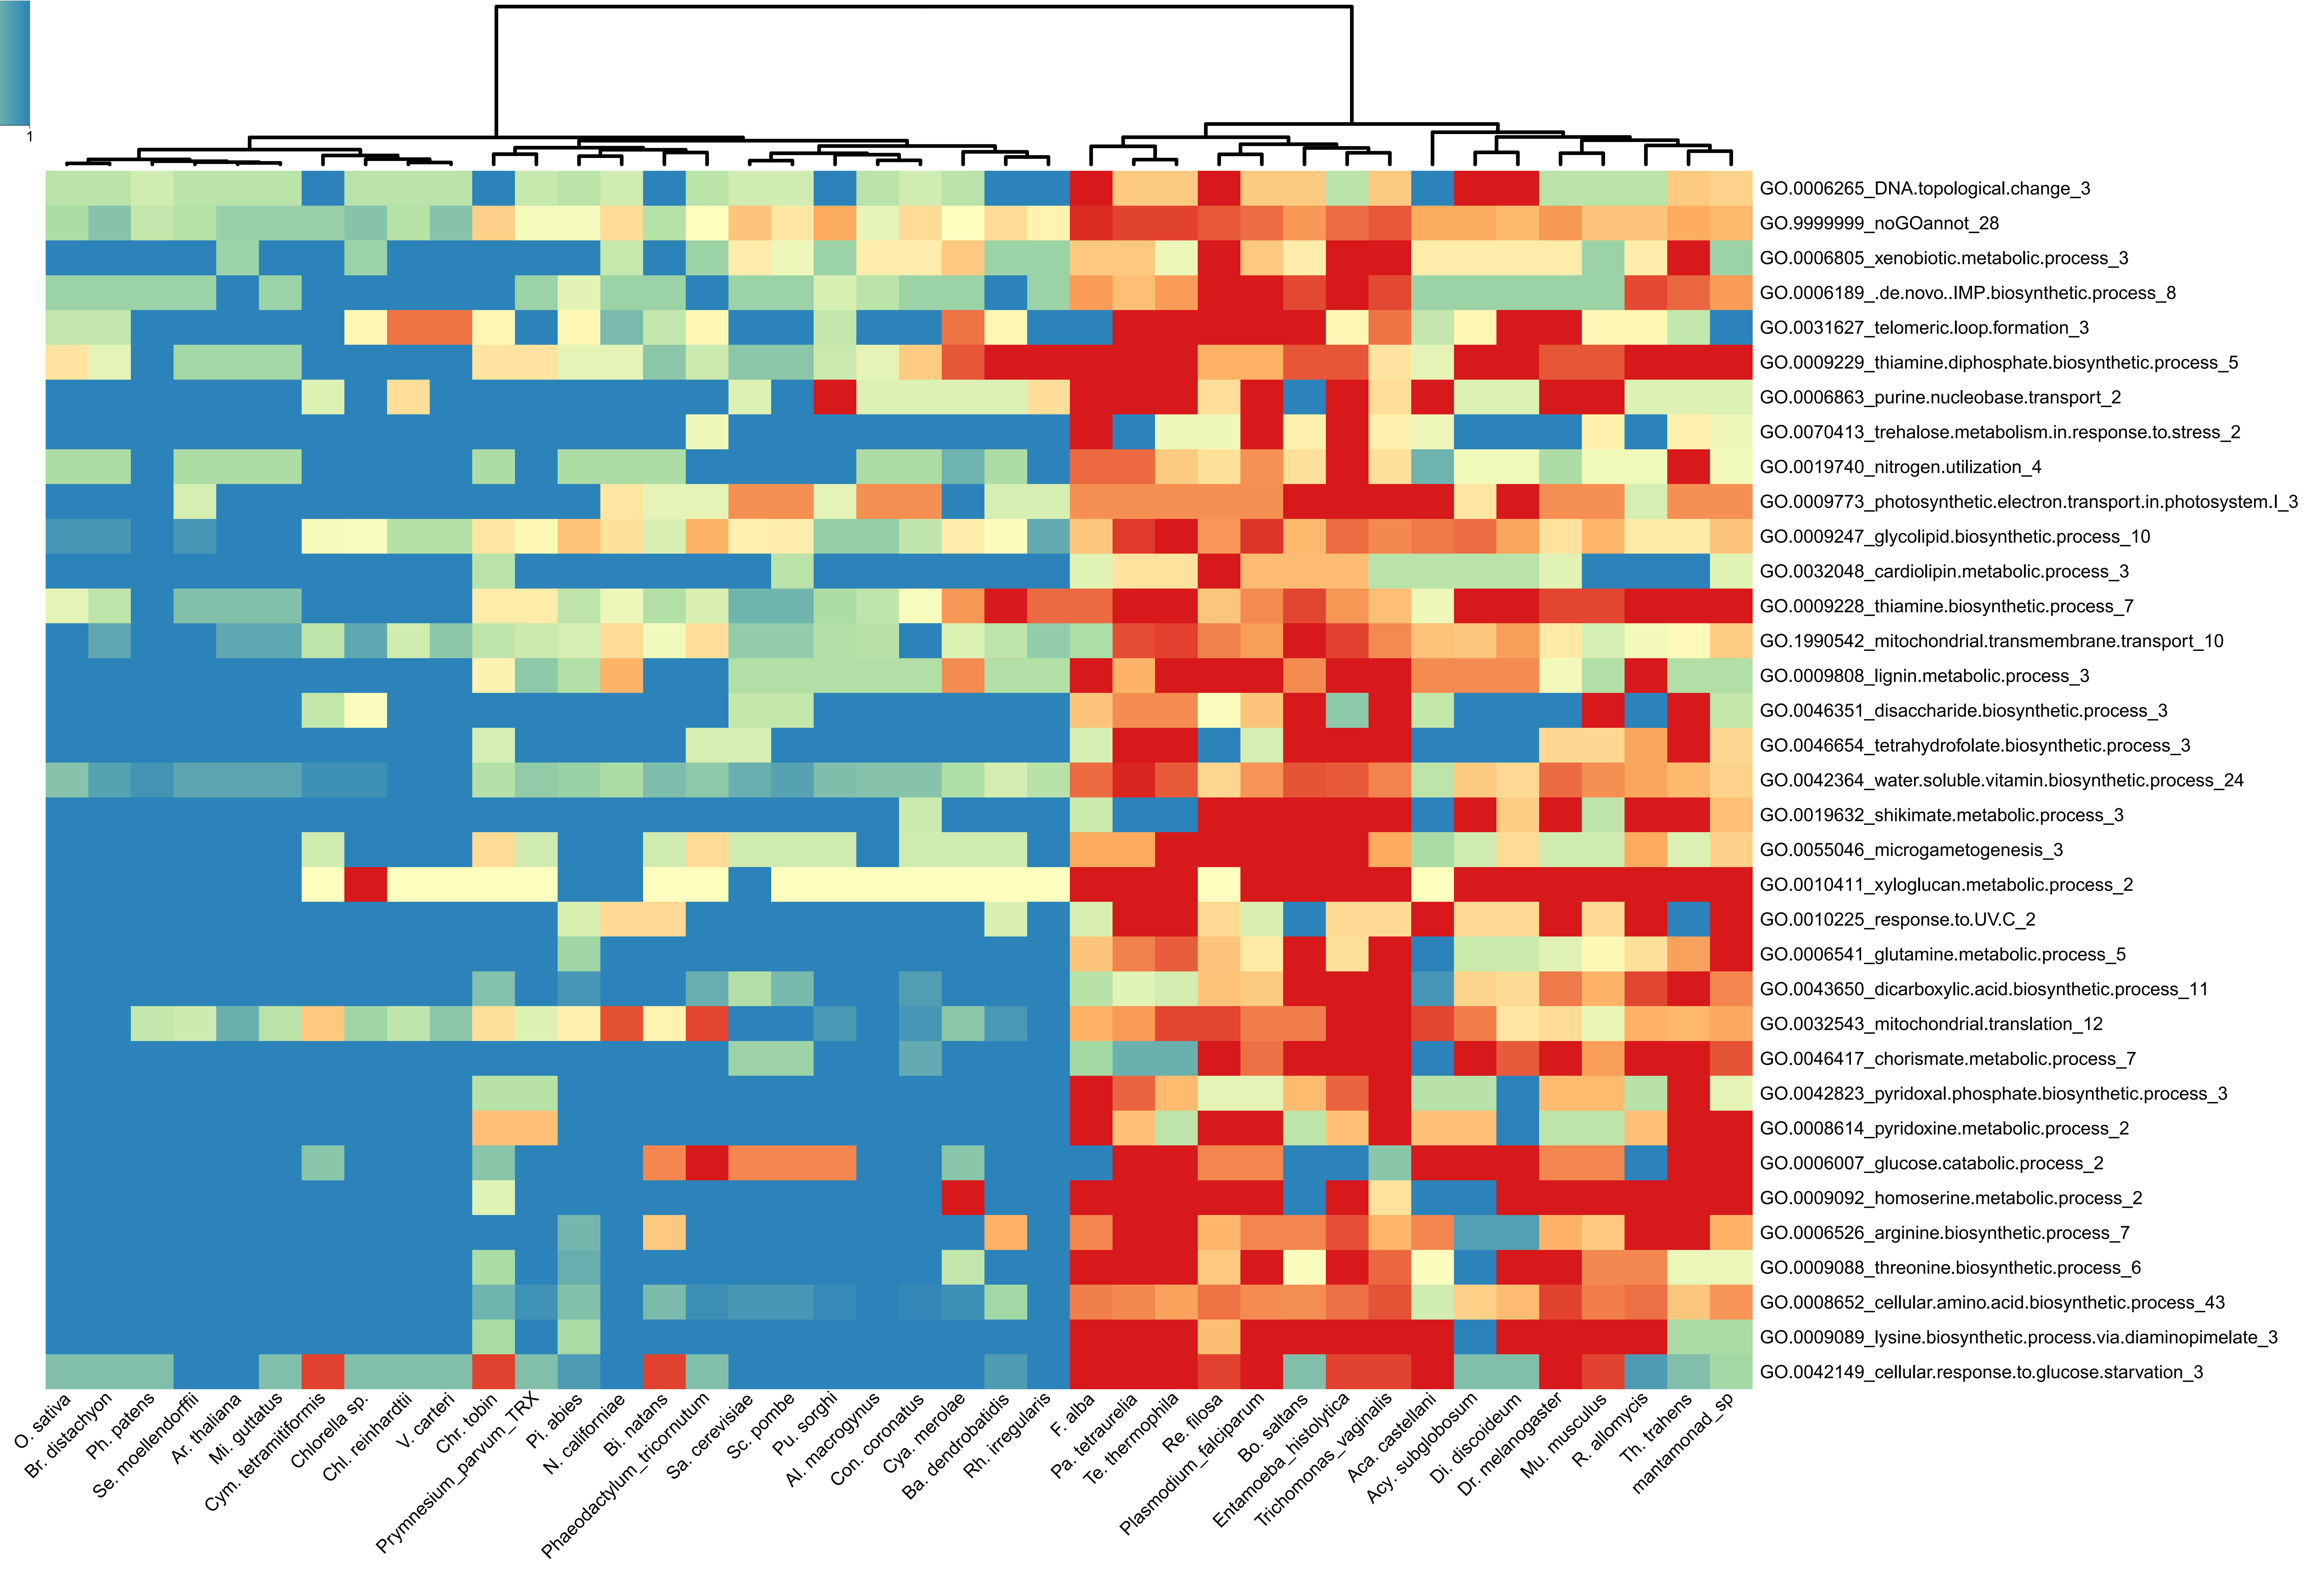

Supplement: 41559_2018_477_MOESM13_ESM.pdf [file 41559_2018_477_MOESM13_ESM.pdf]

Extended Data Figure 10

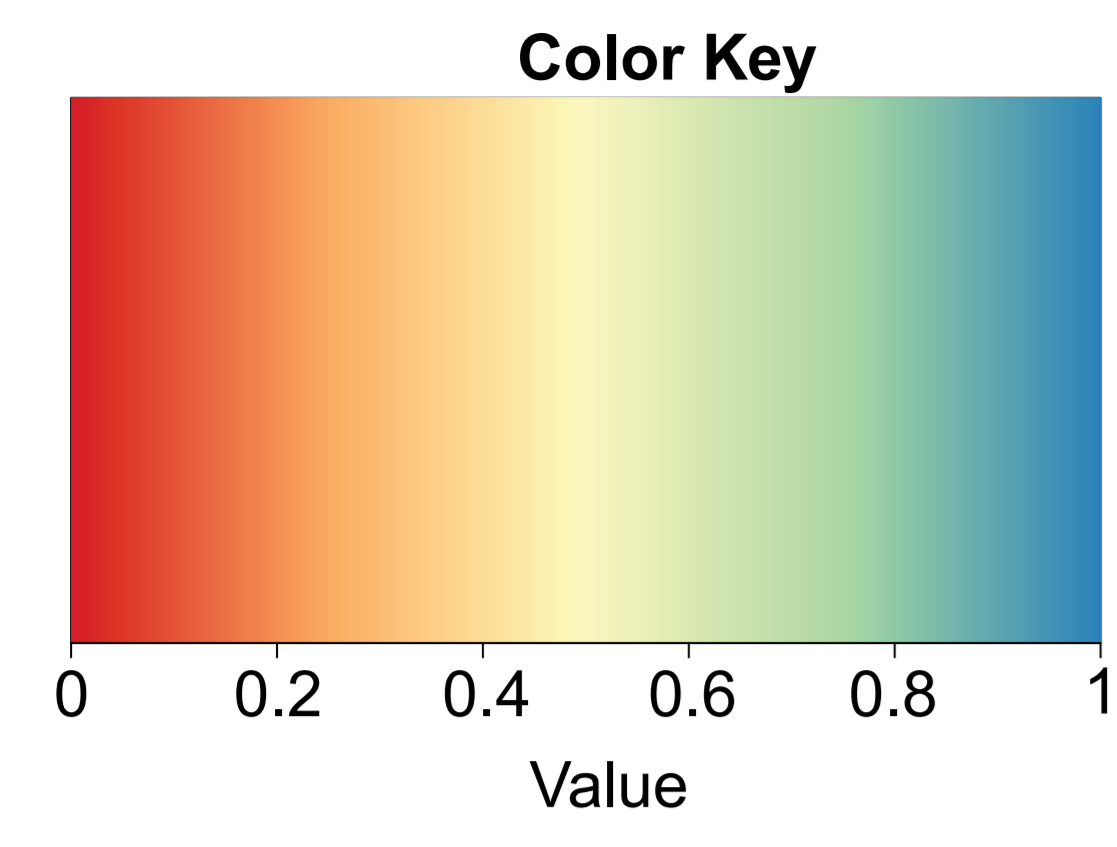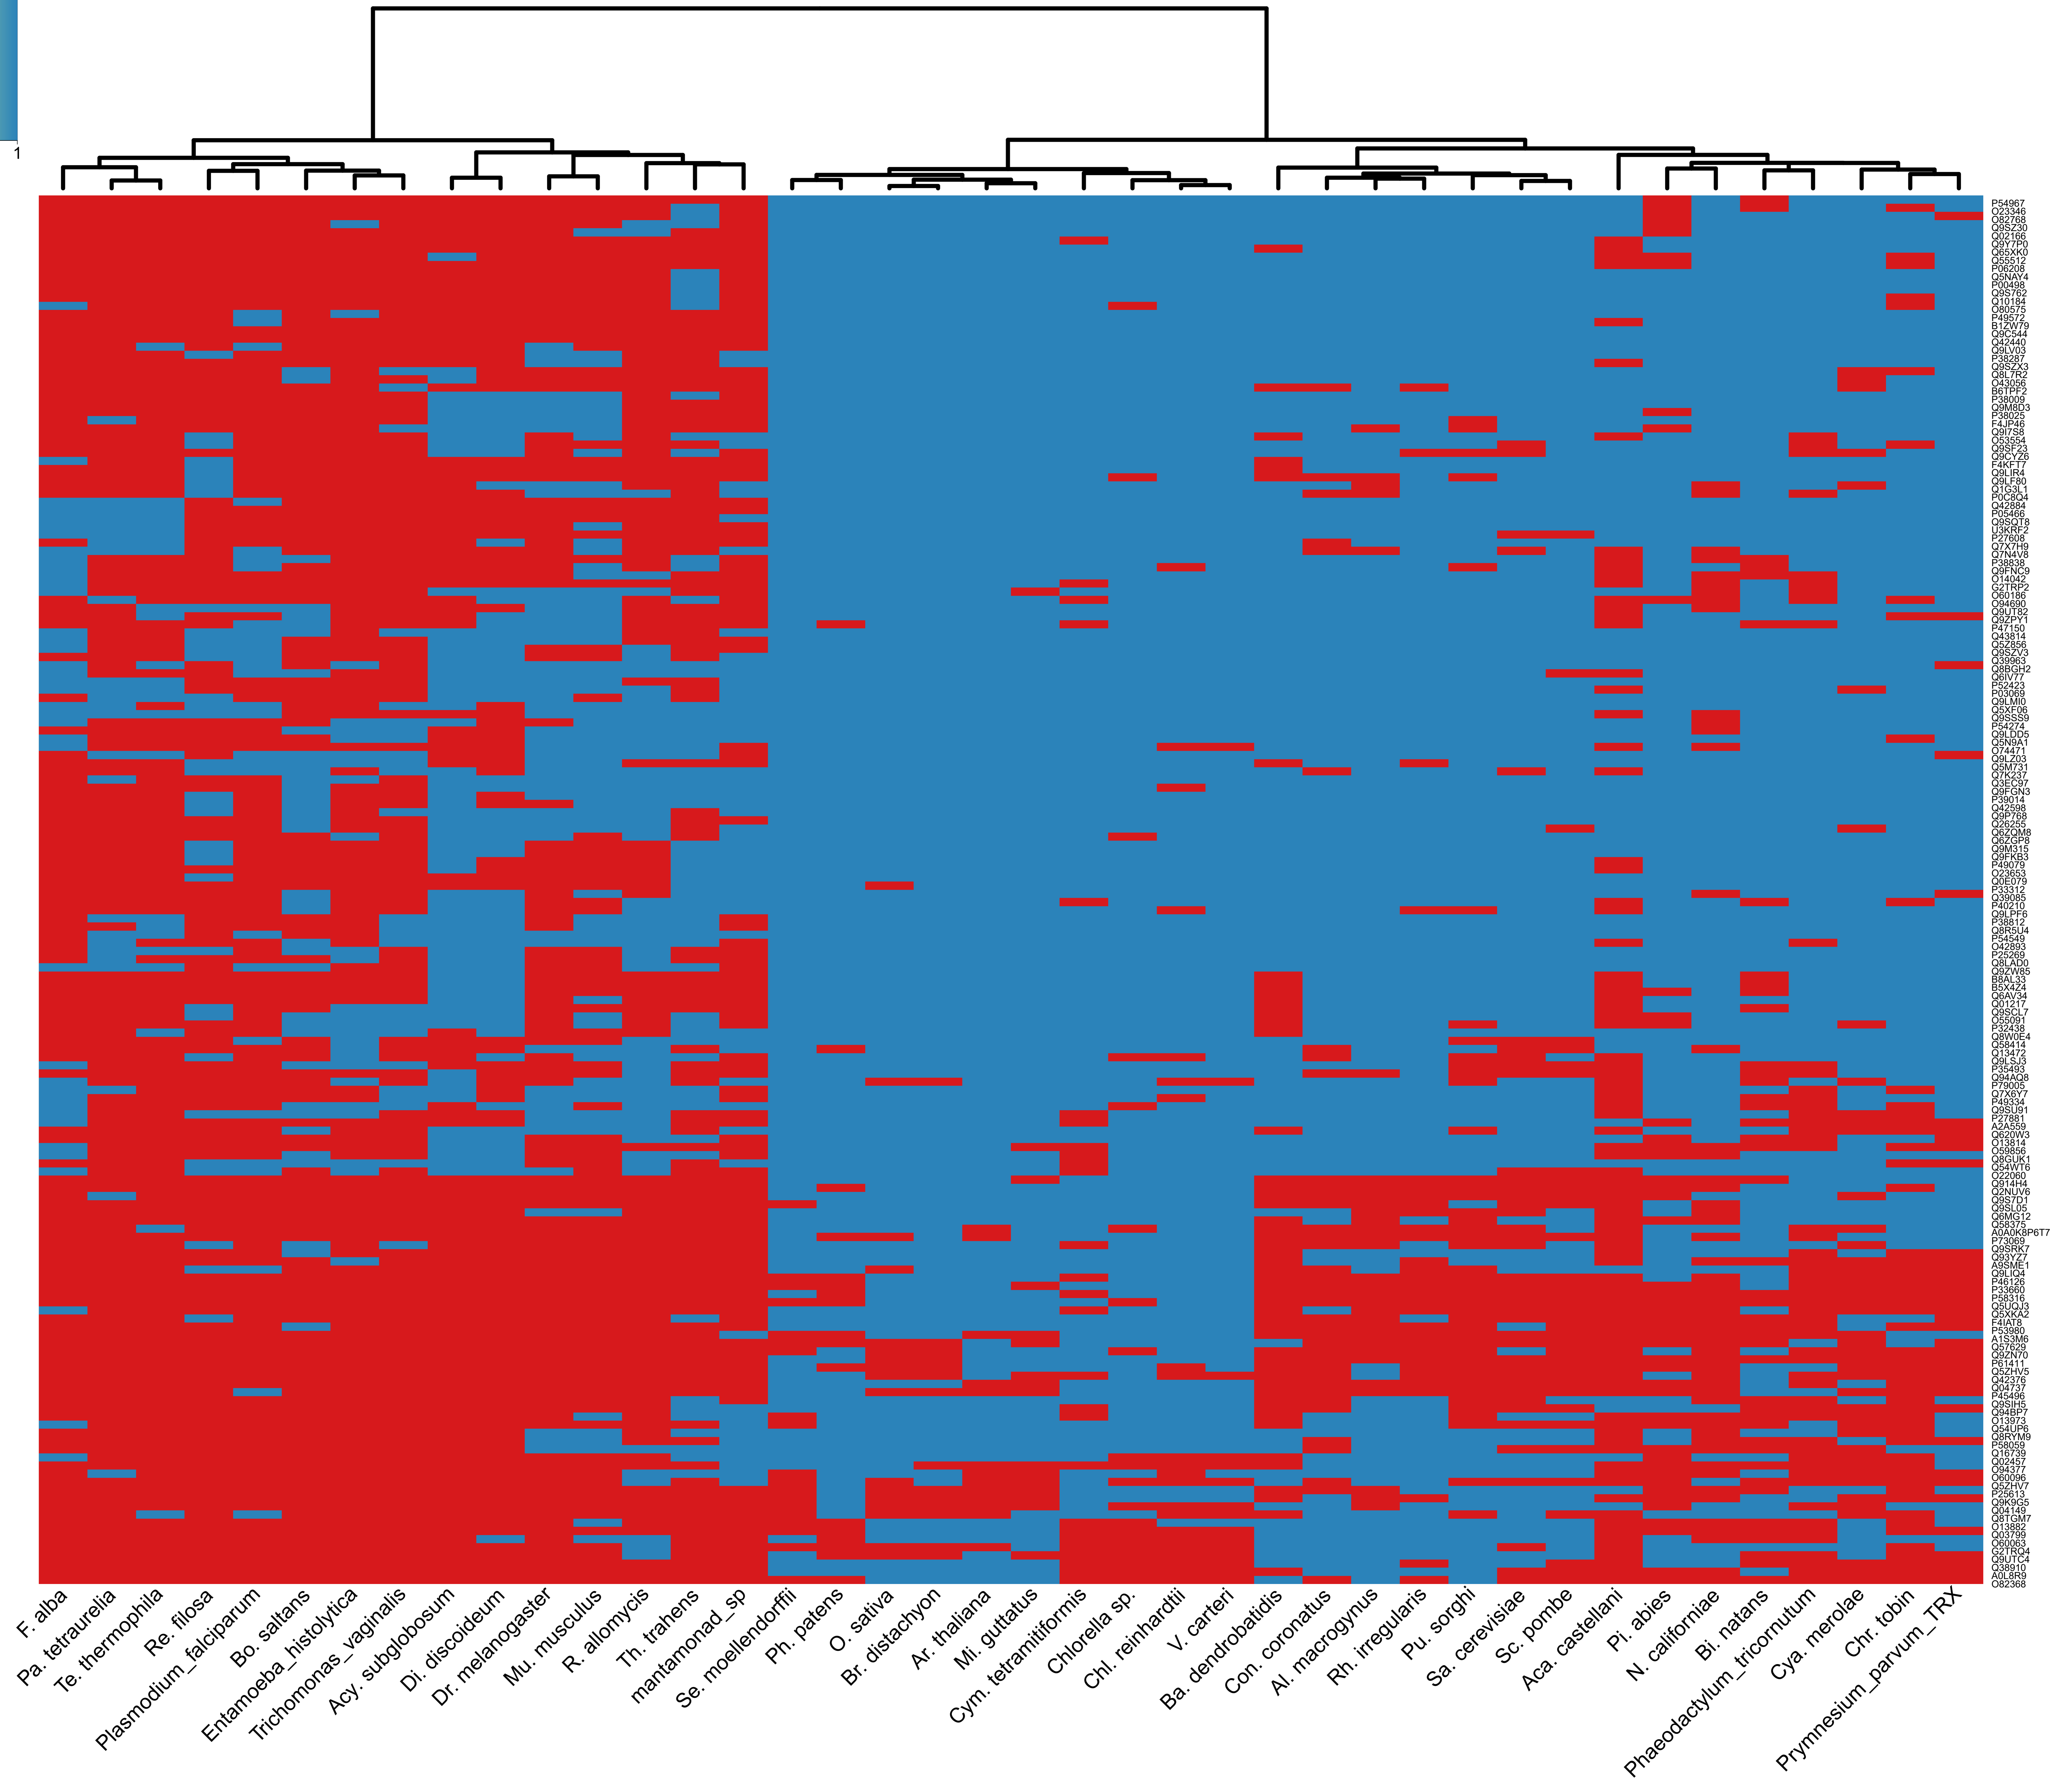

Supplement: 41559_2018_477_MOESM14_ESM.pdf [file 41559_2018_477_MOESM14_ESM.pdf]

Extended Data Figure 11

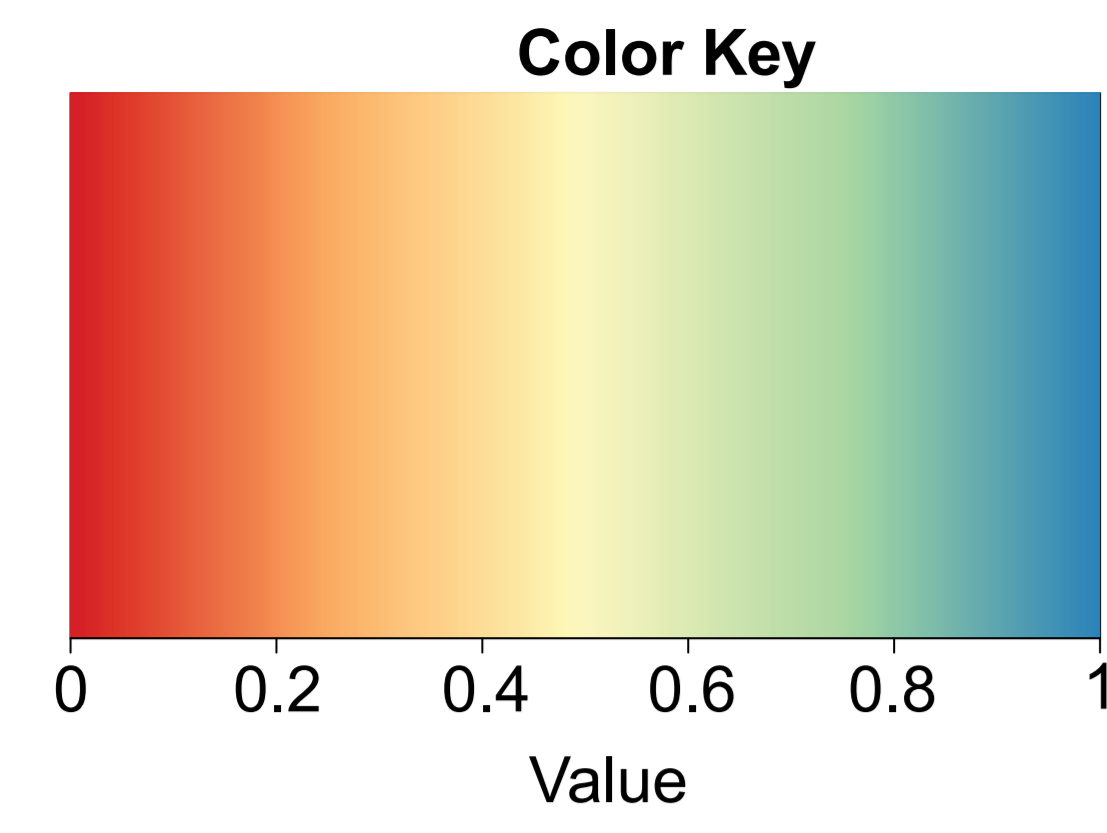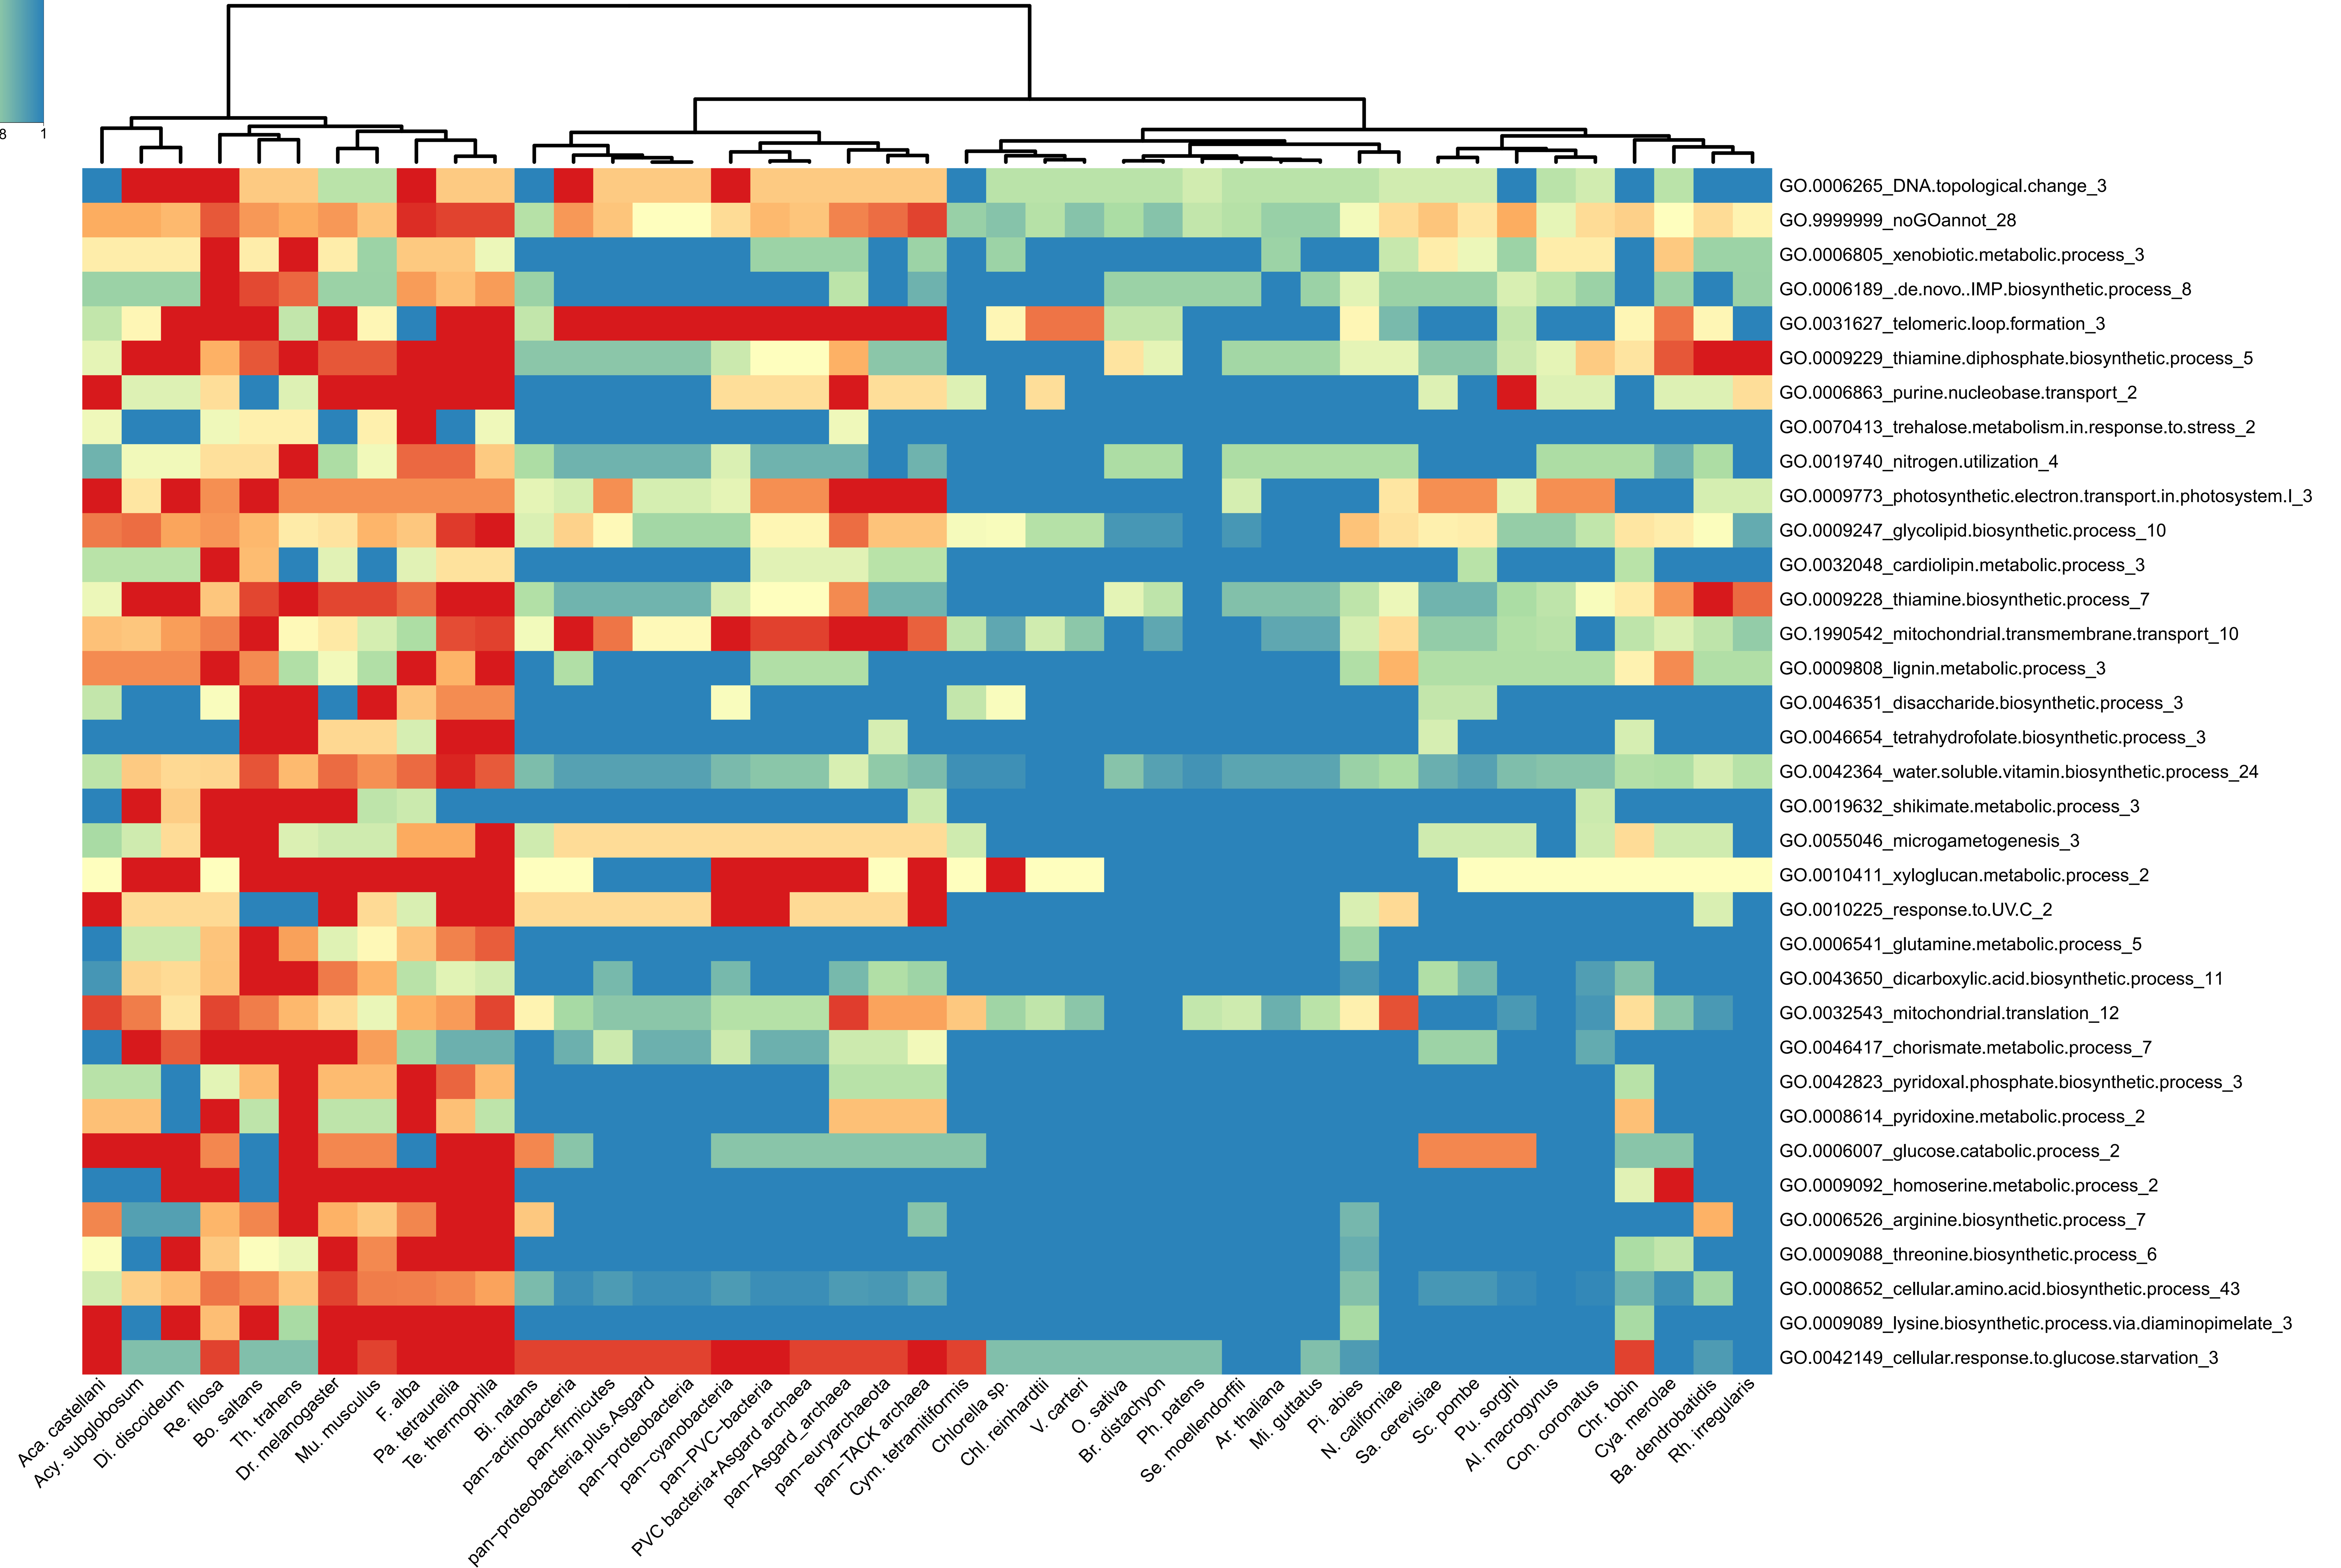

Supplement: 41559_2018_477_MOESM15_ESM.pdf [file 41559_2018_477_MOESM15_ESM.pdf]

Extended Data Figure 12

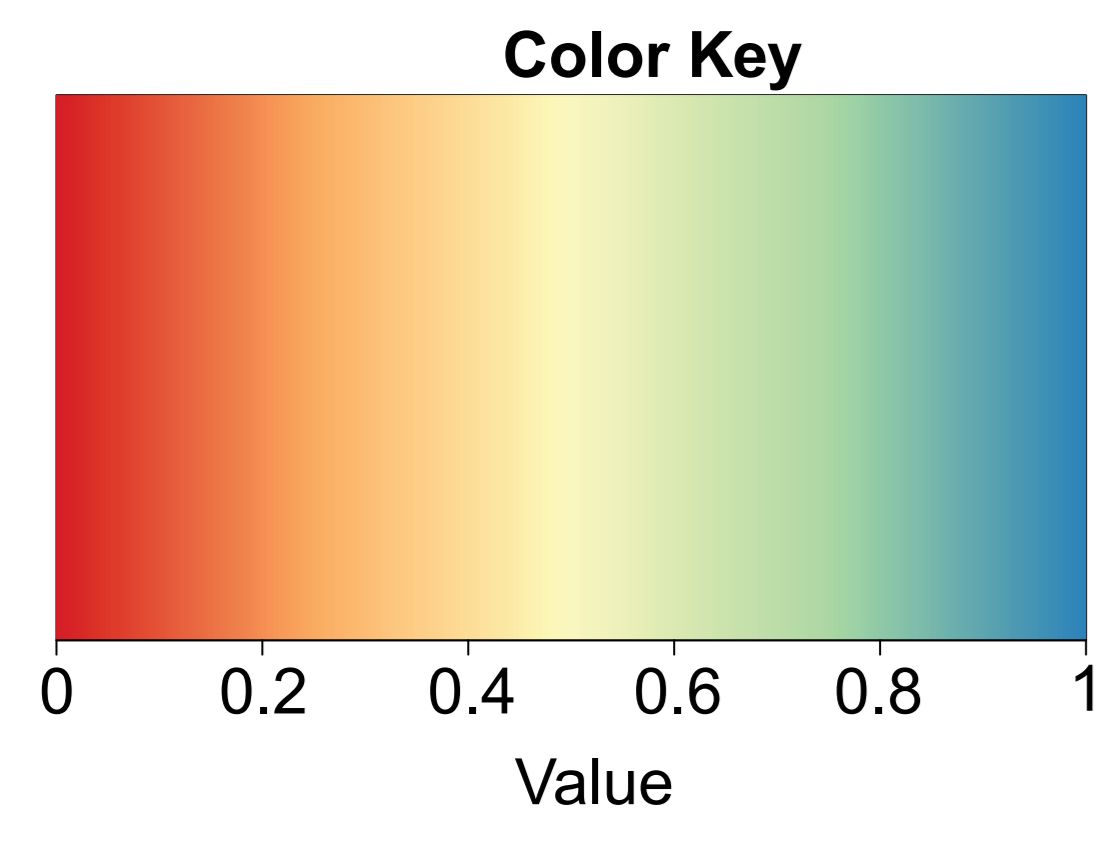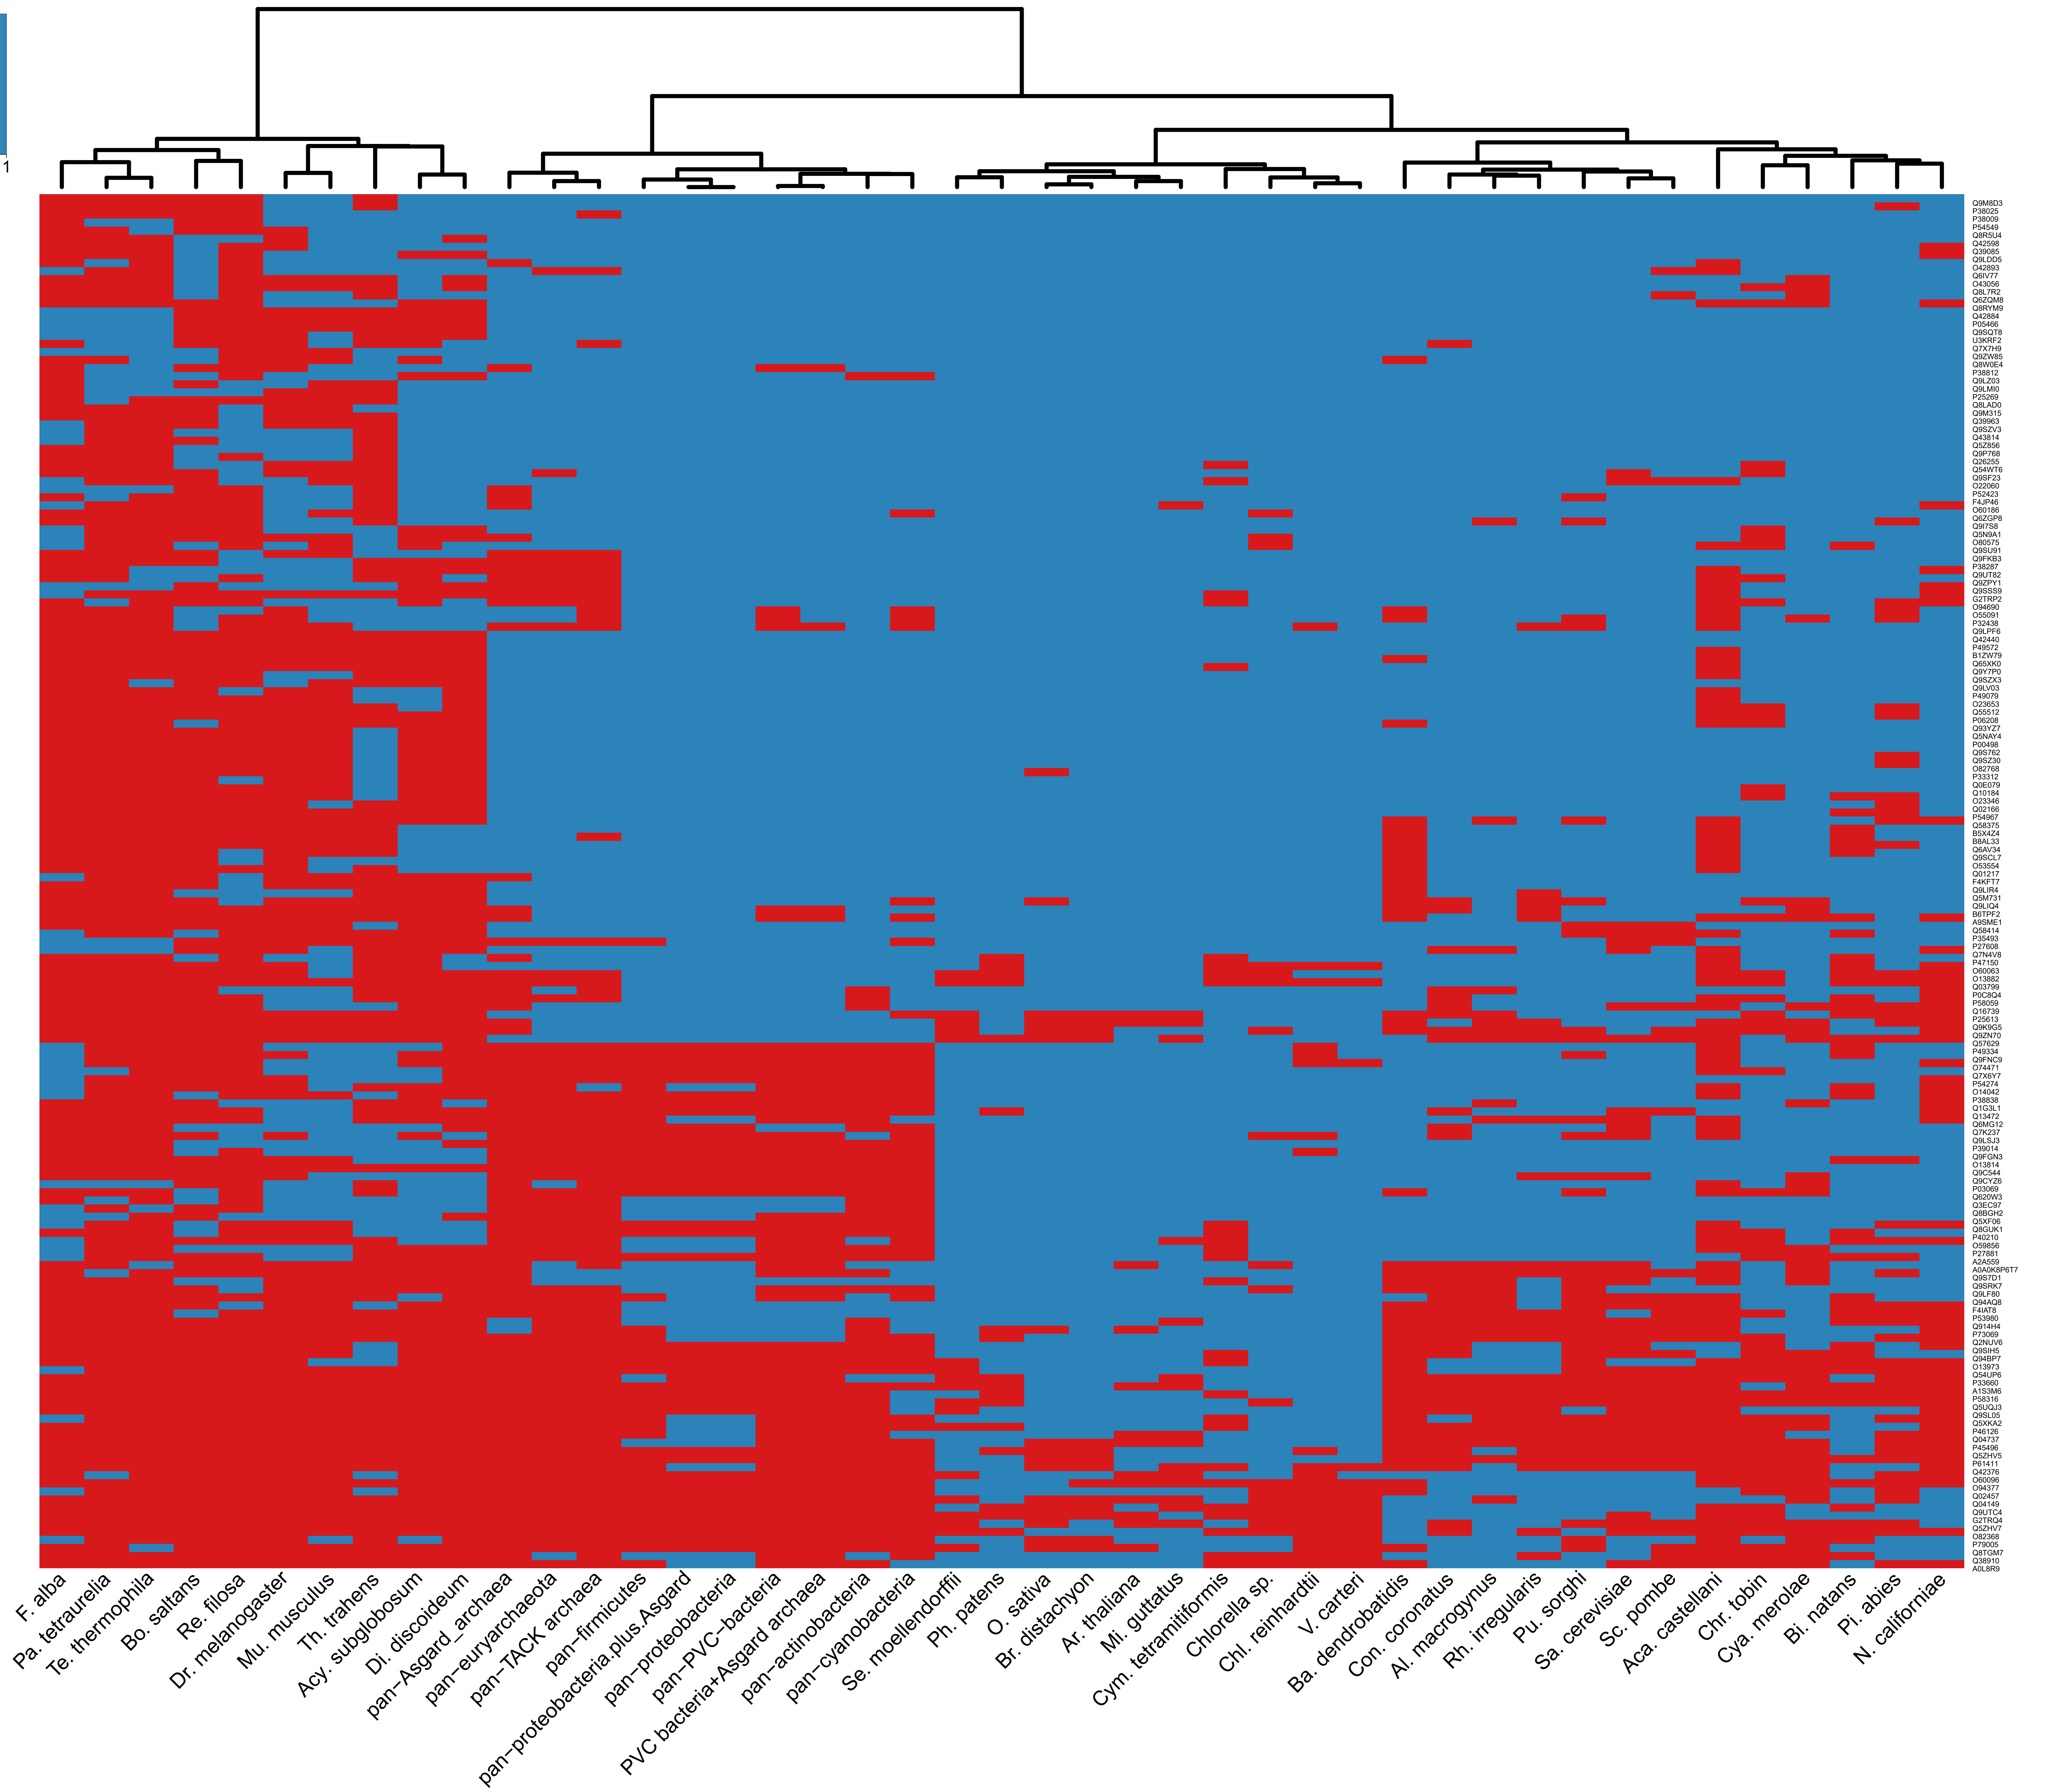

Supplement: 41559_2018_477_MOESM16_ESM.pdf [file 41559_2018_477_MOESM16_ESM.pdf]

Extended Data Figure 13

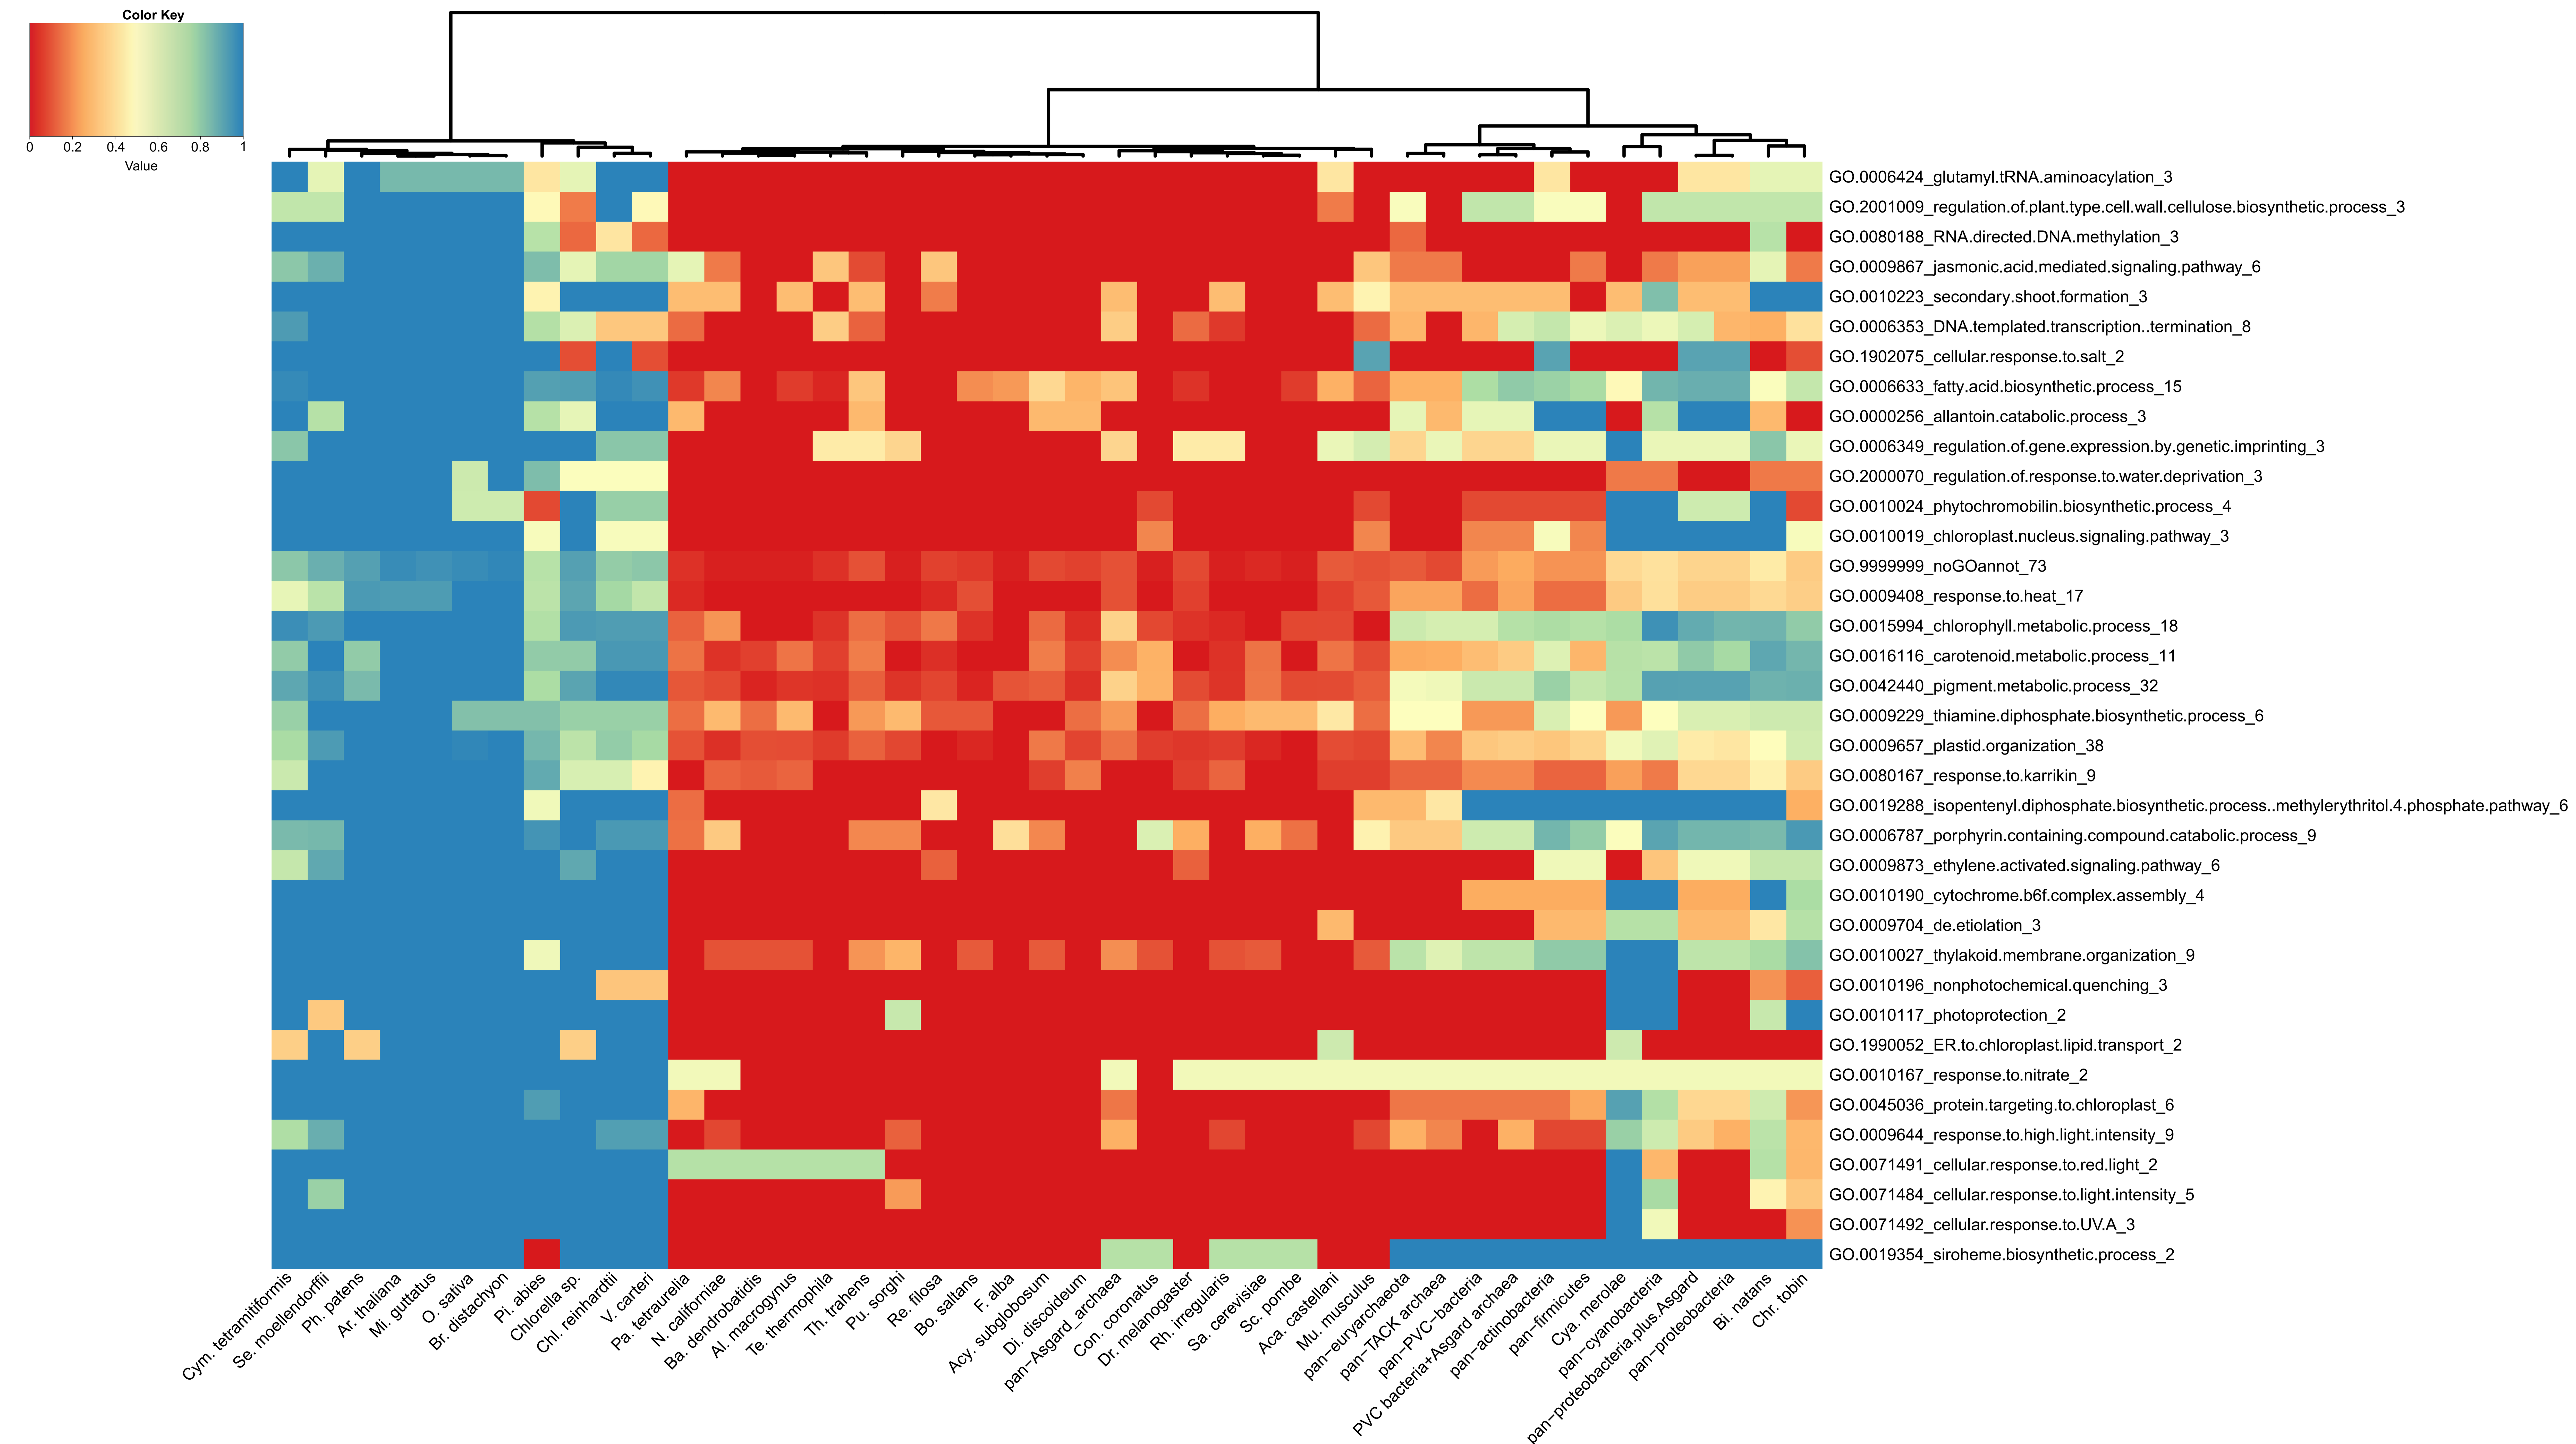

Supplement: 41559_2018_477_MOESM17_ESM.pdf [file 41559_2018_477_MOESM17_ESM.pdf]

Extended Data Figure 14

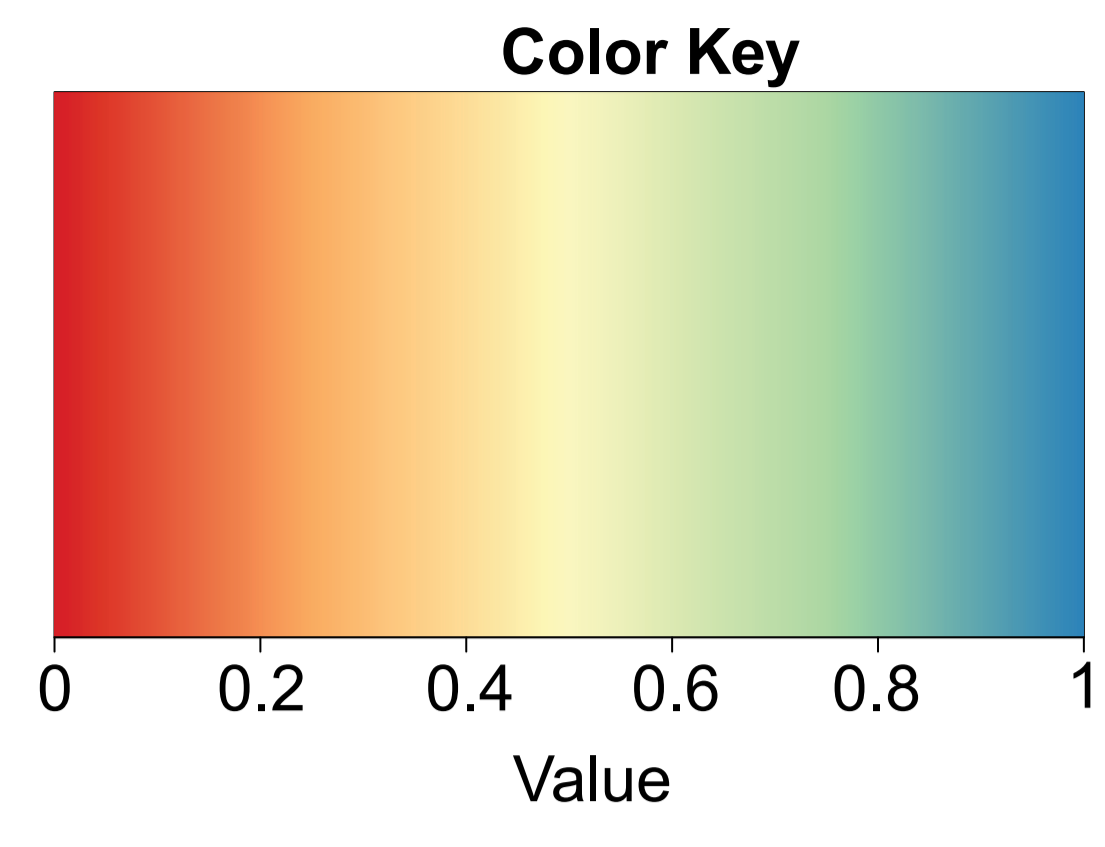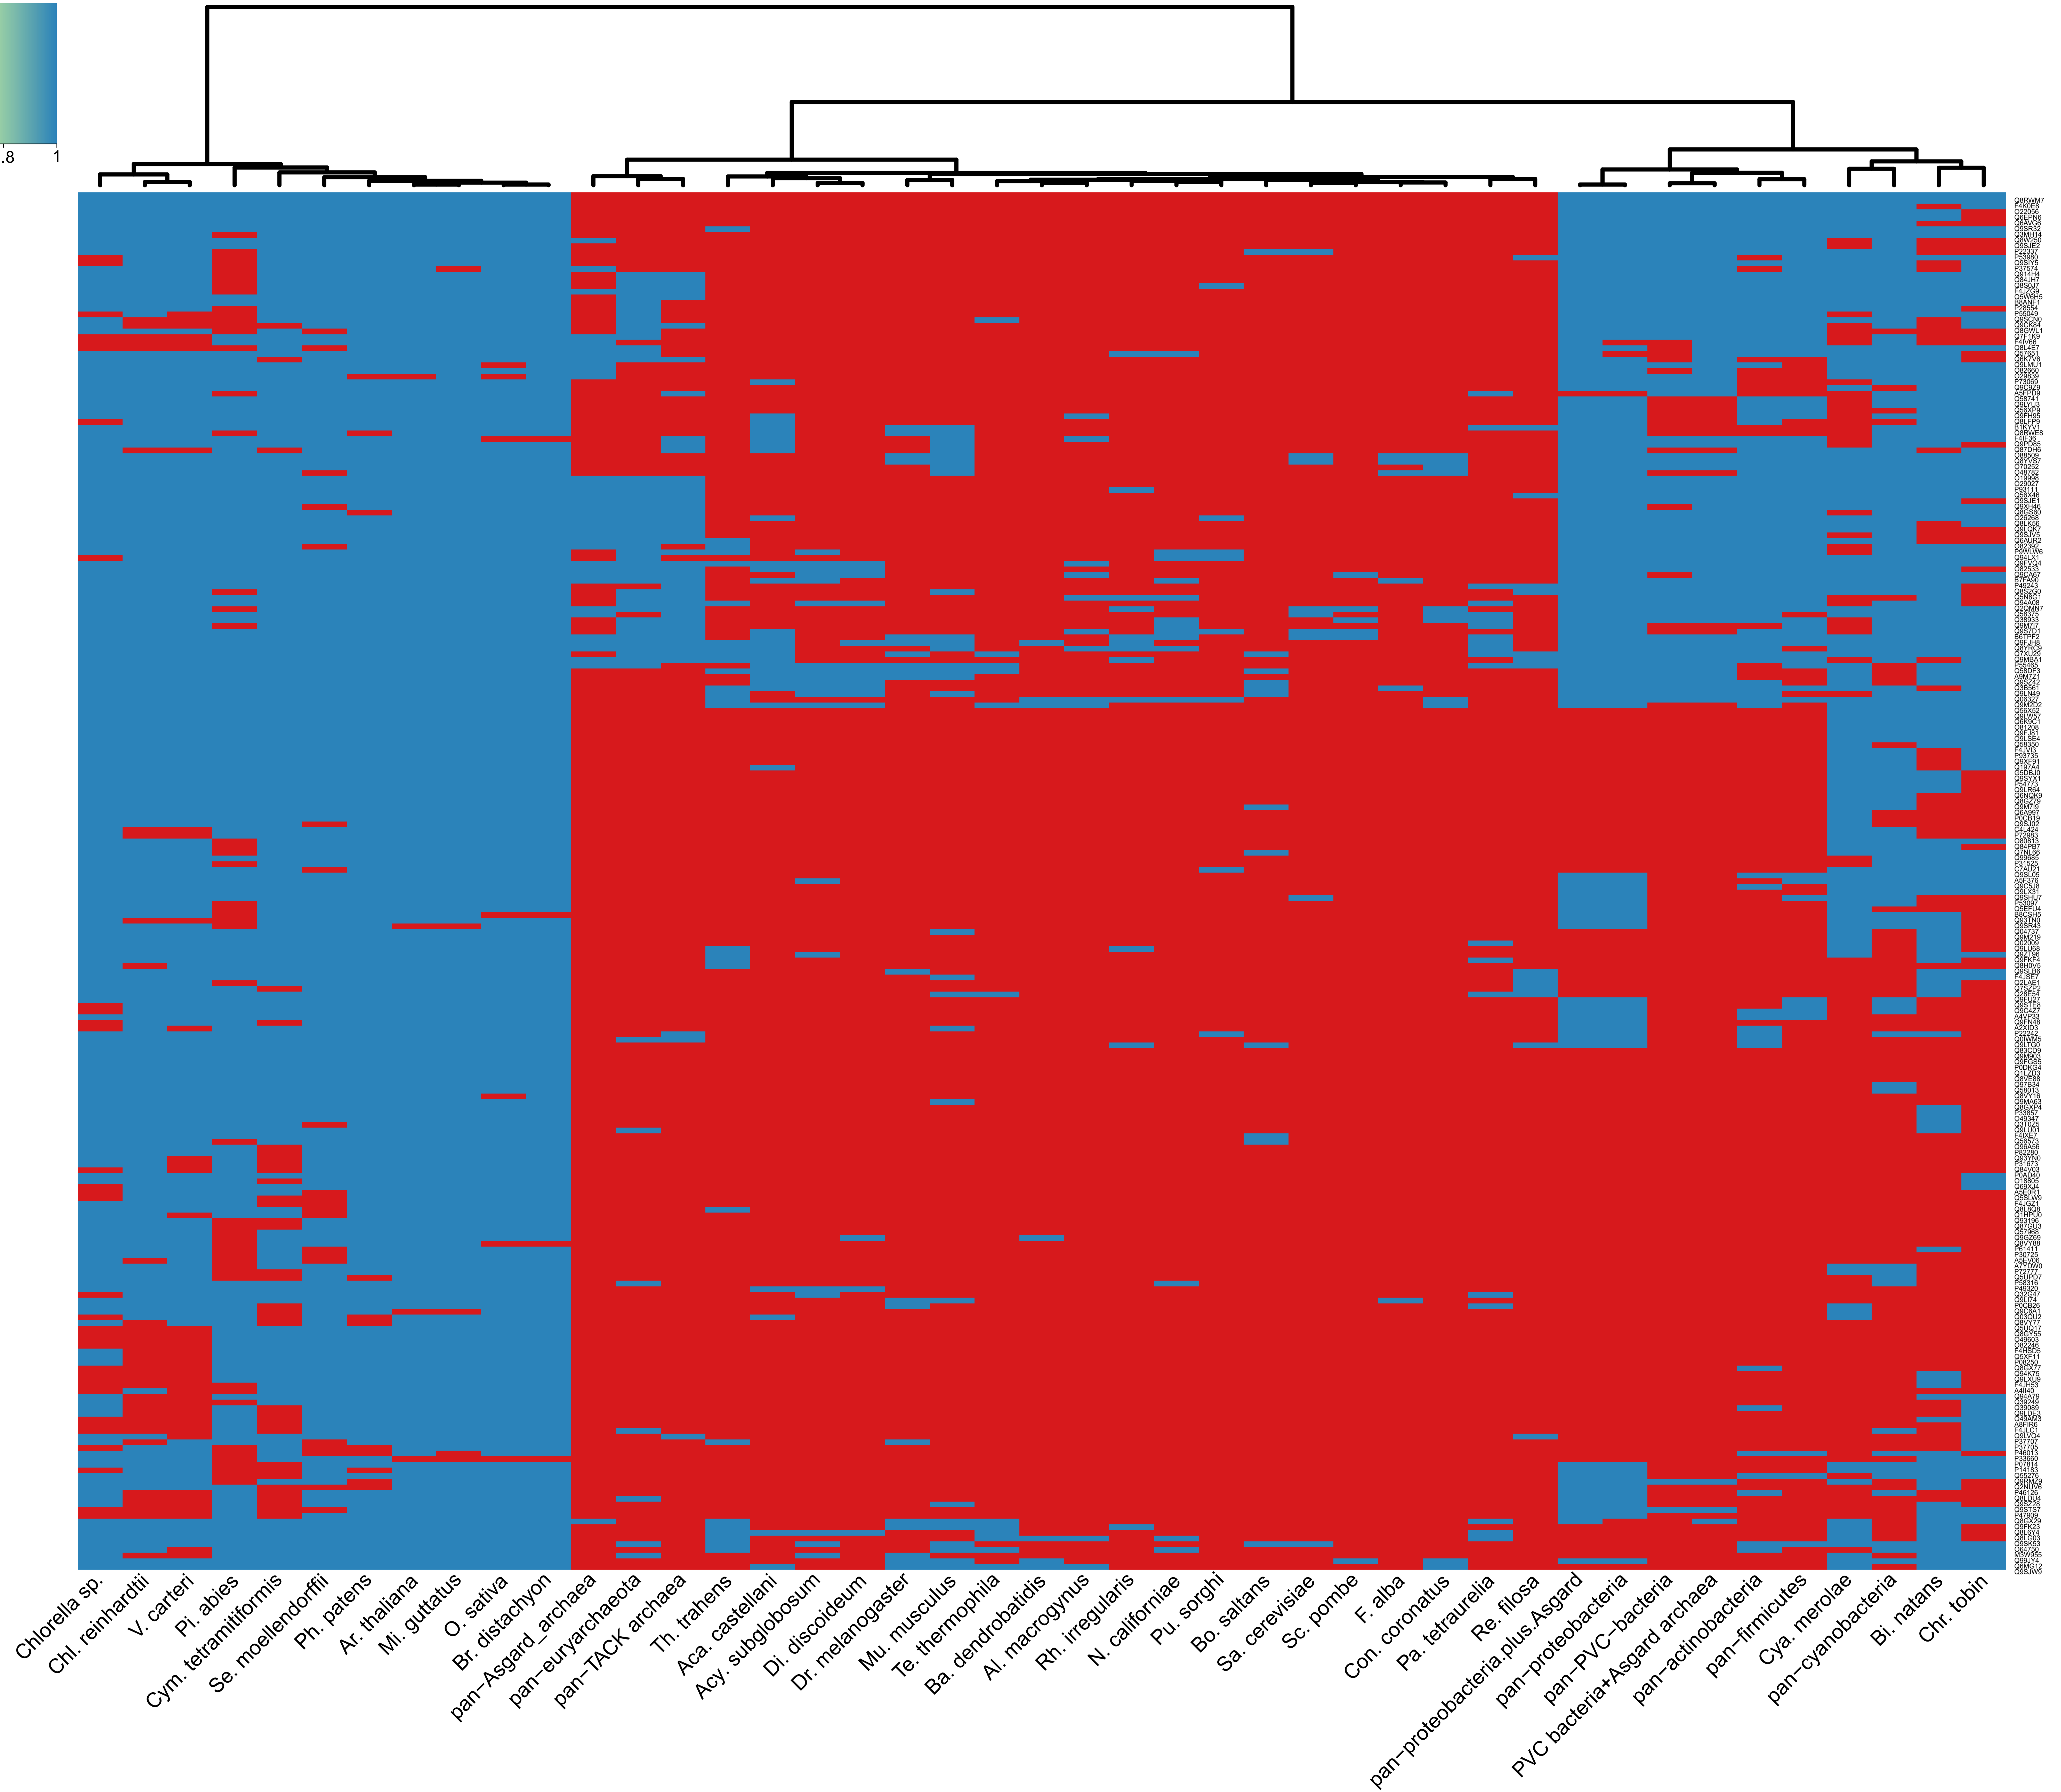

Supplement: 41559_2018_477_MOESM18_ESM.pdf [file 41559_2018_477_MOESM18_ESM.pdf]

Extended Data Figure 15

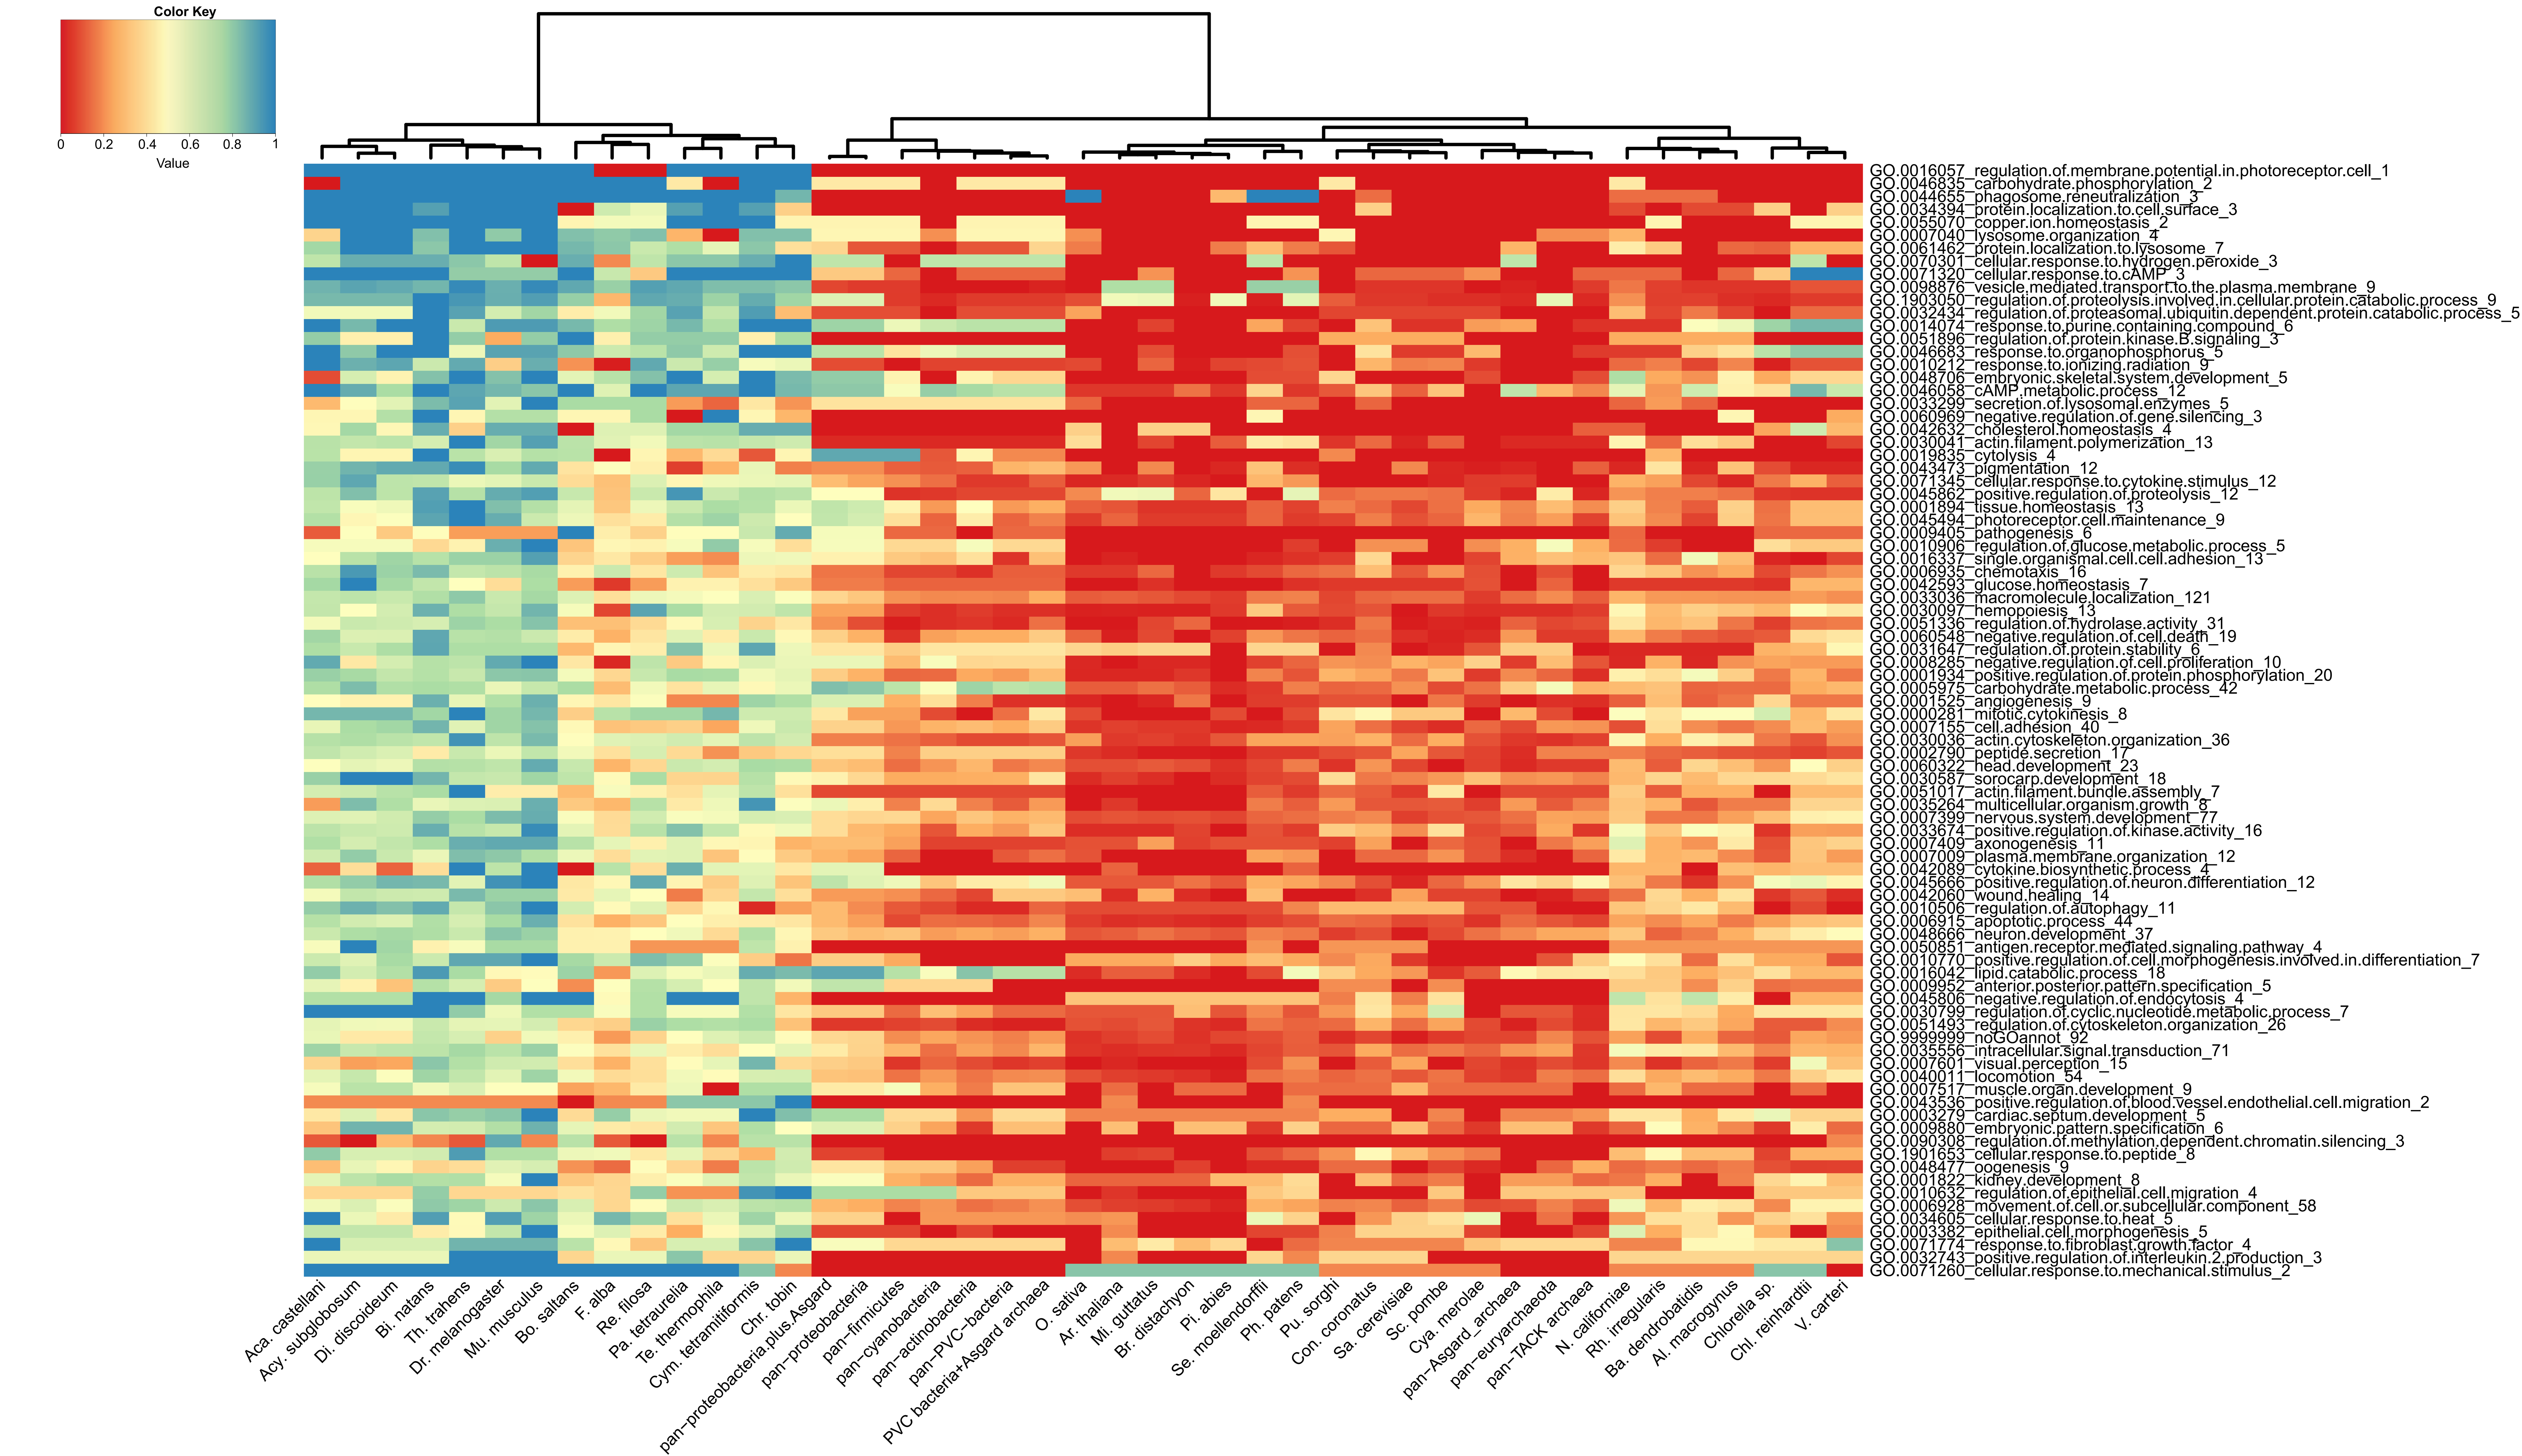

Supplement: 41559_2018_477_MOESM19_ESM.pdf [file 41559_2018_477_MOESM19_ESM.pdf]

Extended Data Figure 16

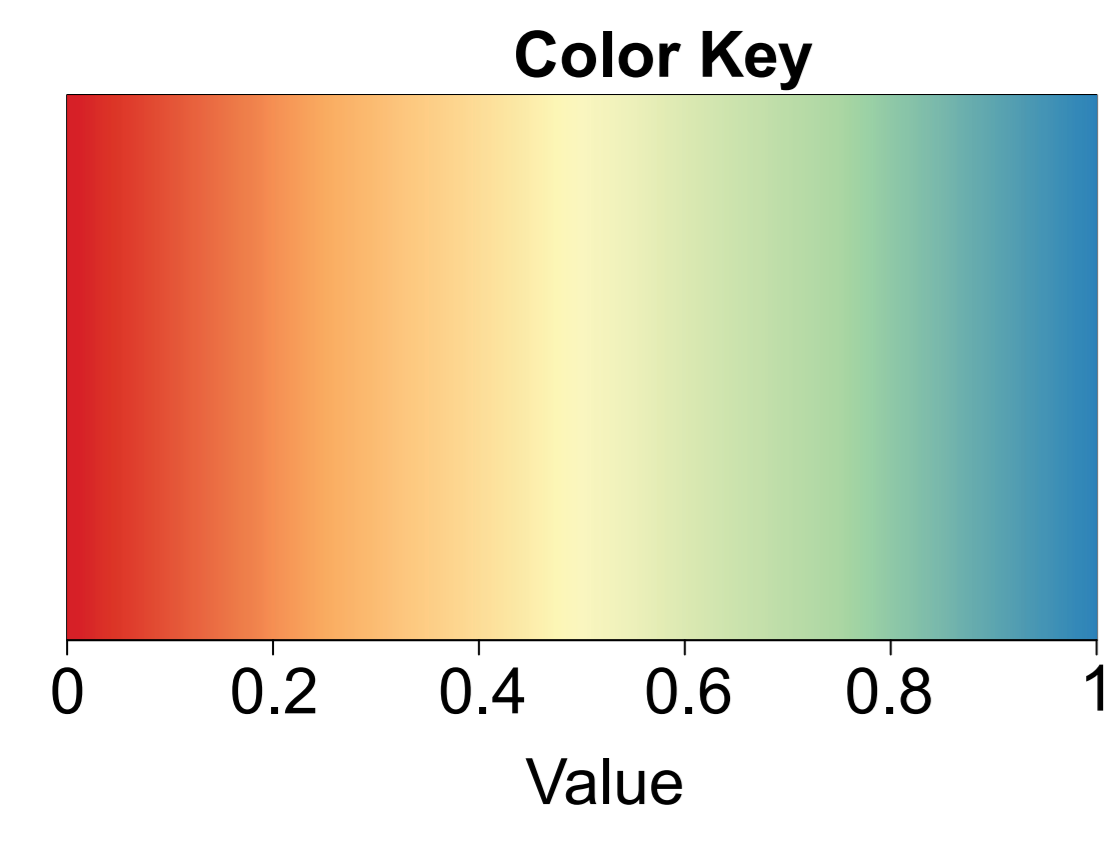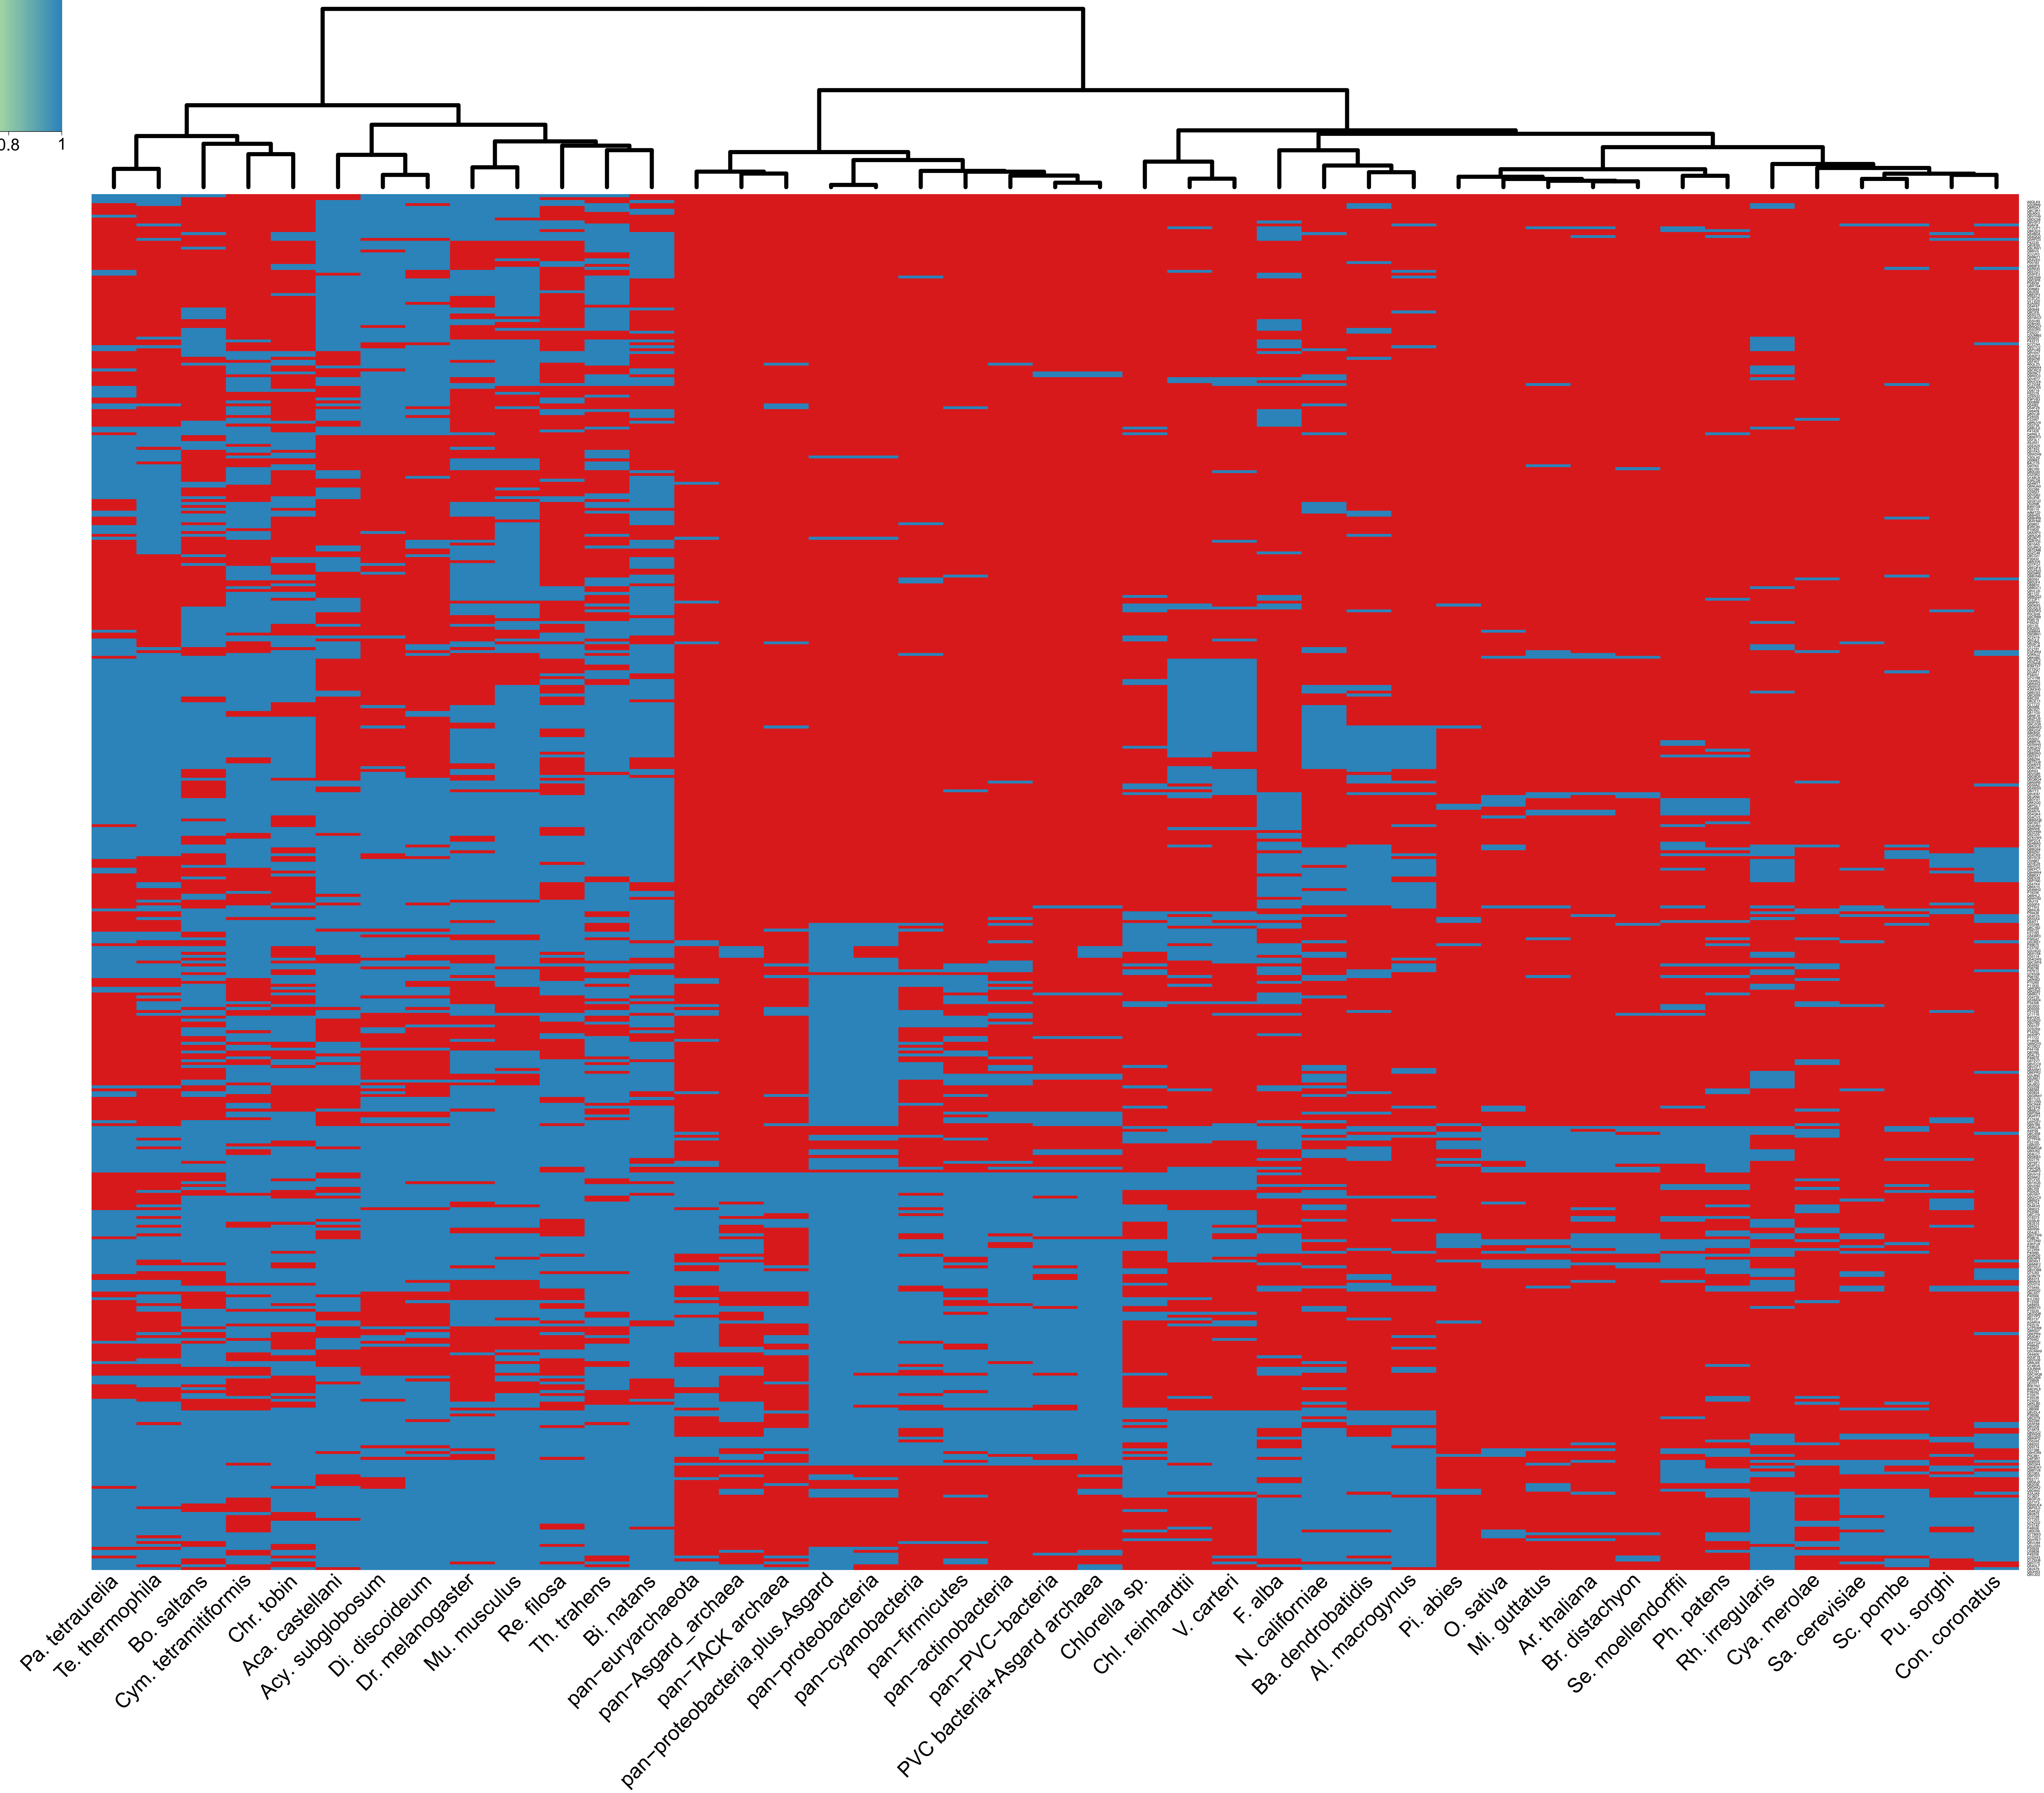

Supplement: 41559_2018_477_MOESM20_ESM.pdf [file 41559_2018_477_MOESM20_ESM.pdf]

Extended Data Figure 17

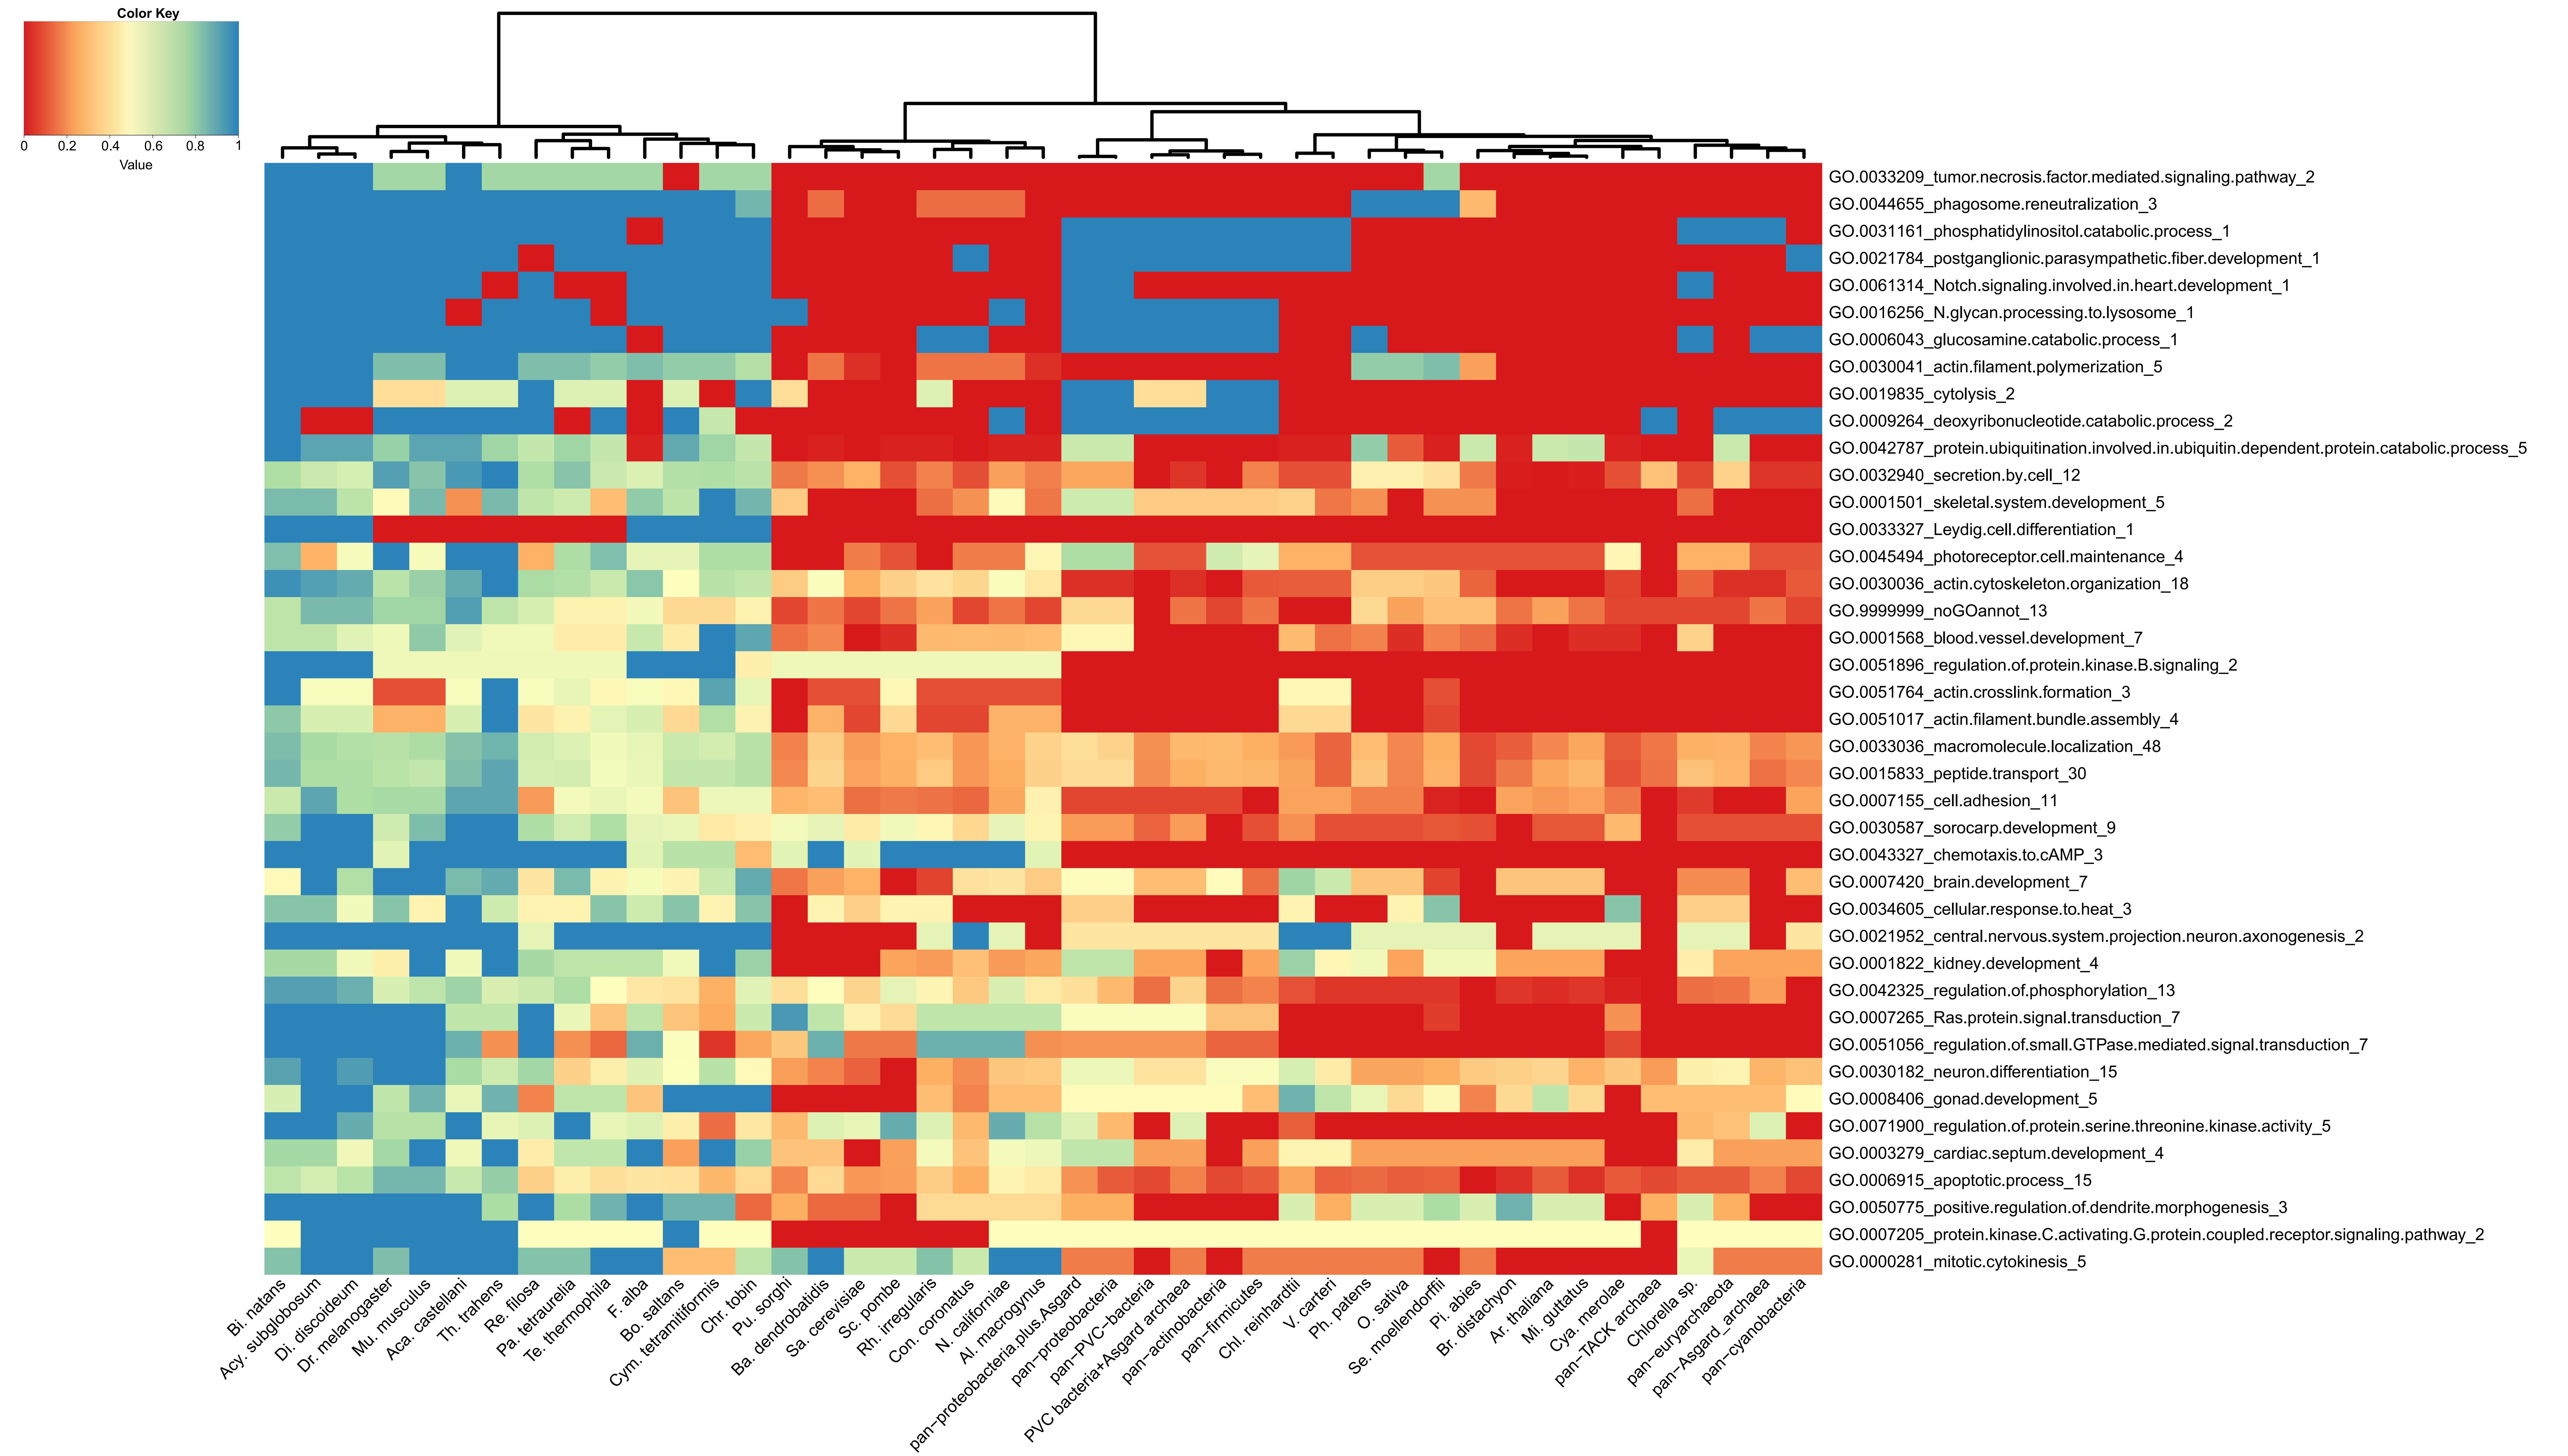

Supplement: 41559_2018_477_MOESM21_ESM.pdf [file 41559_2018_477_MOESM21_ESM.pdf]

Extended Data Figure 18

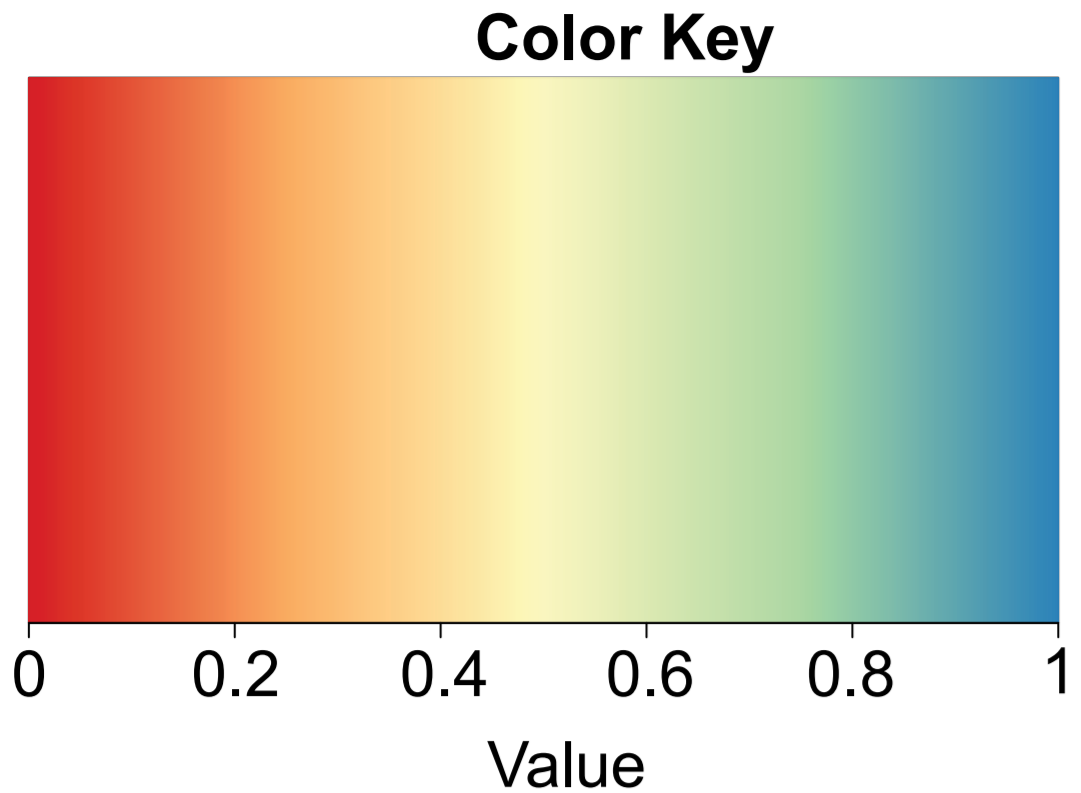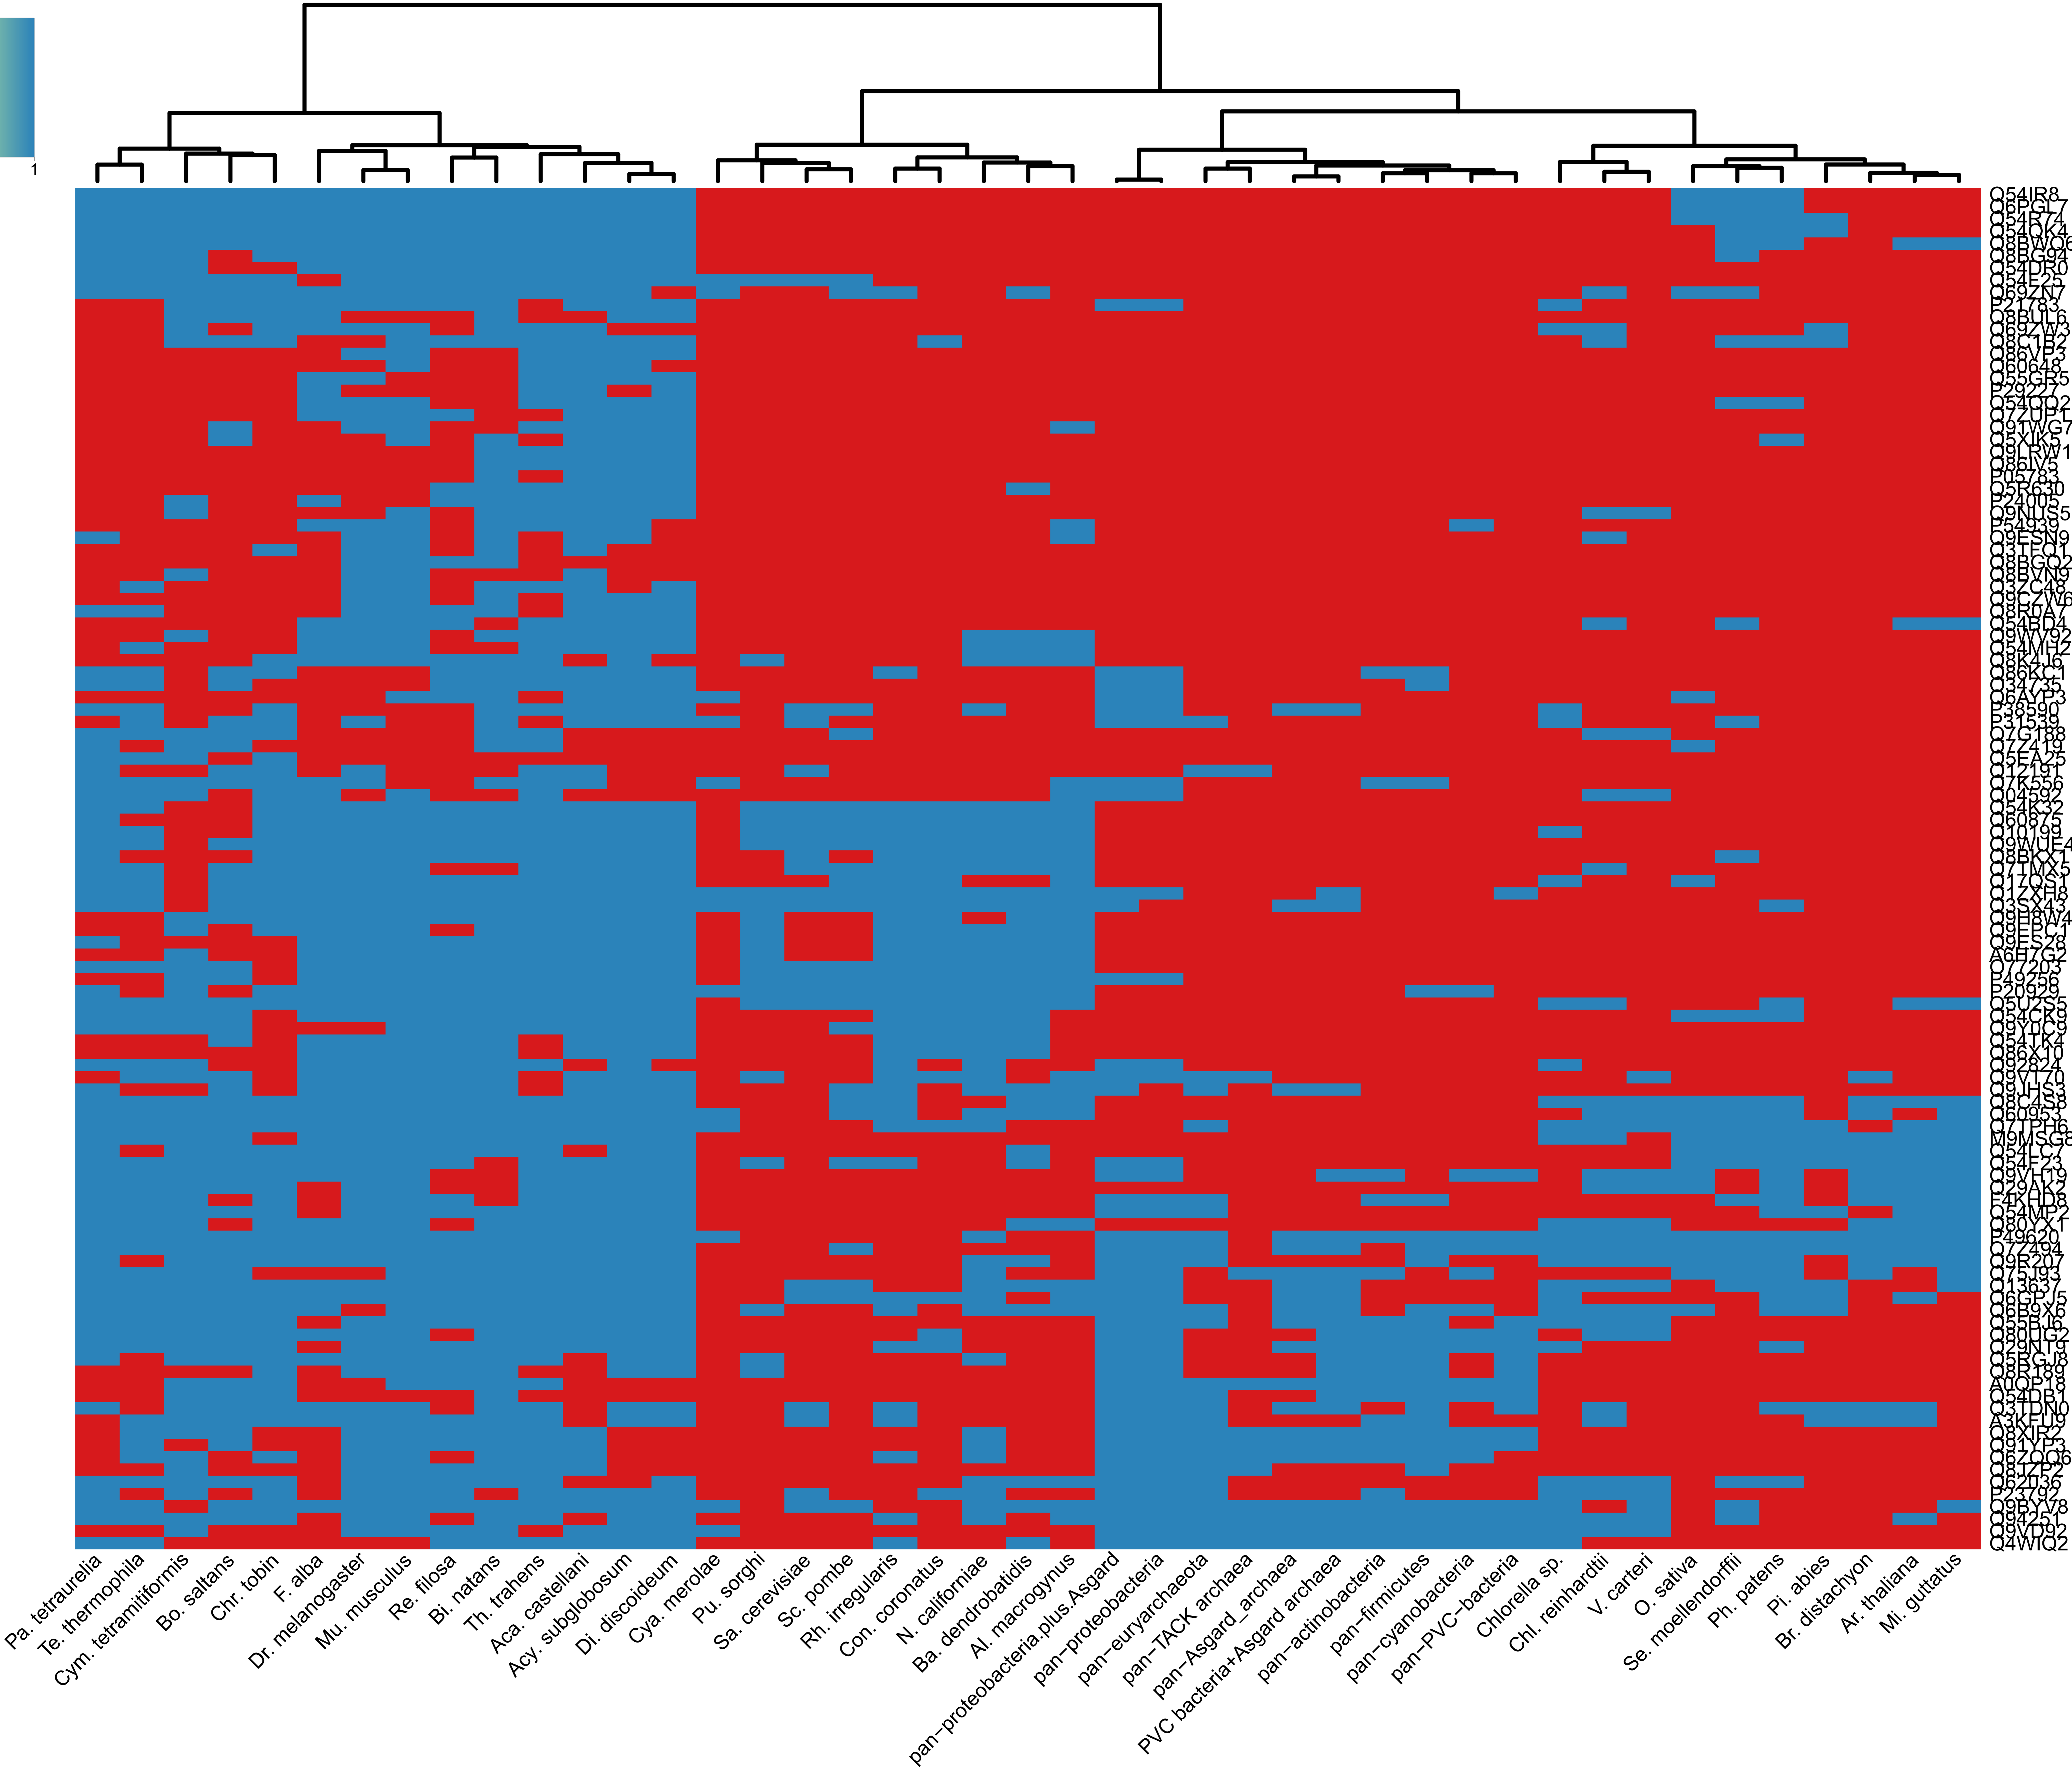

Supplement: 41559_2018_477_MOESM22_ESM.pdf [file 41559_2018_477_MOESM22_ESM.pdf]

Extended Data Figure 19

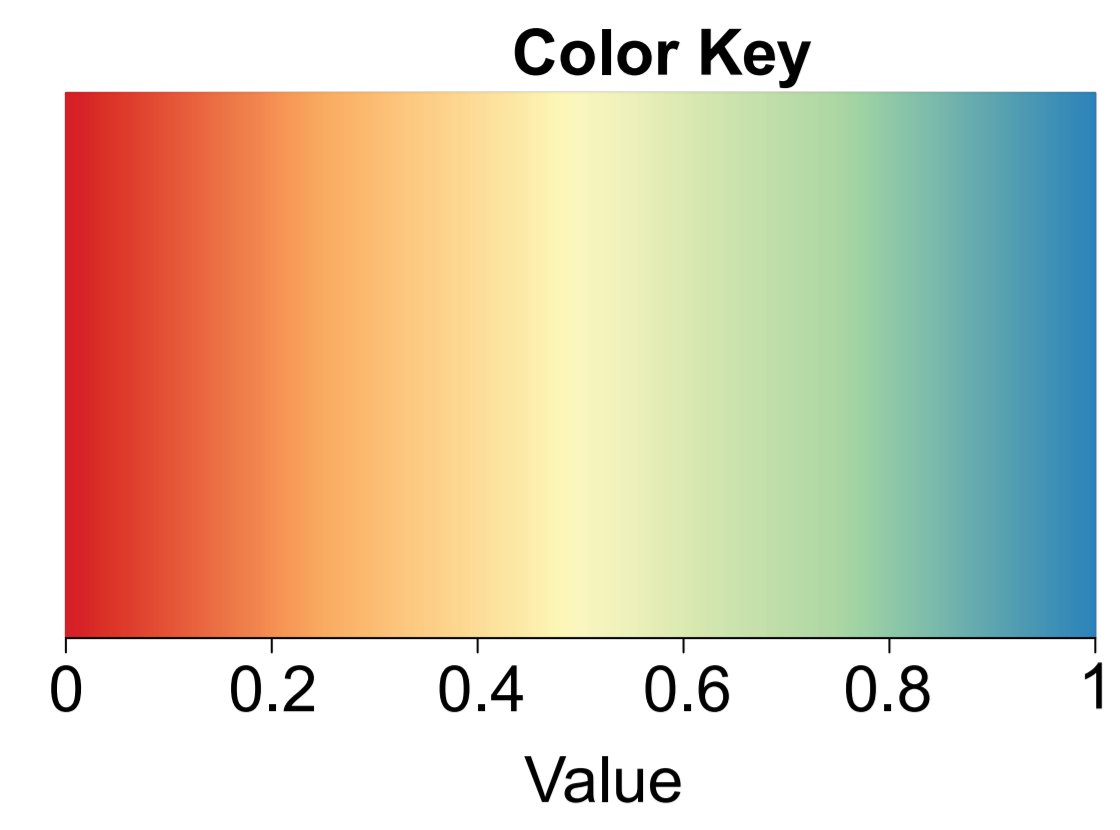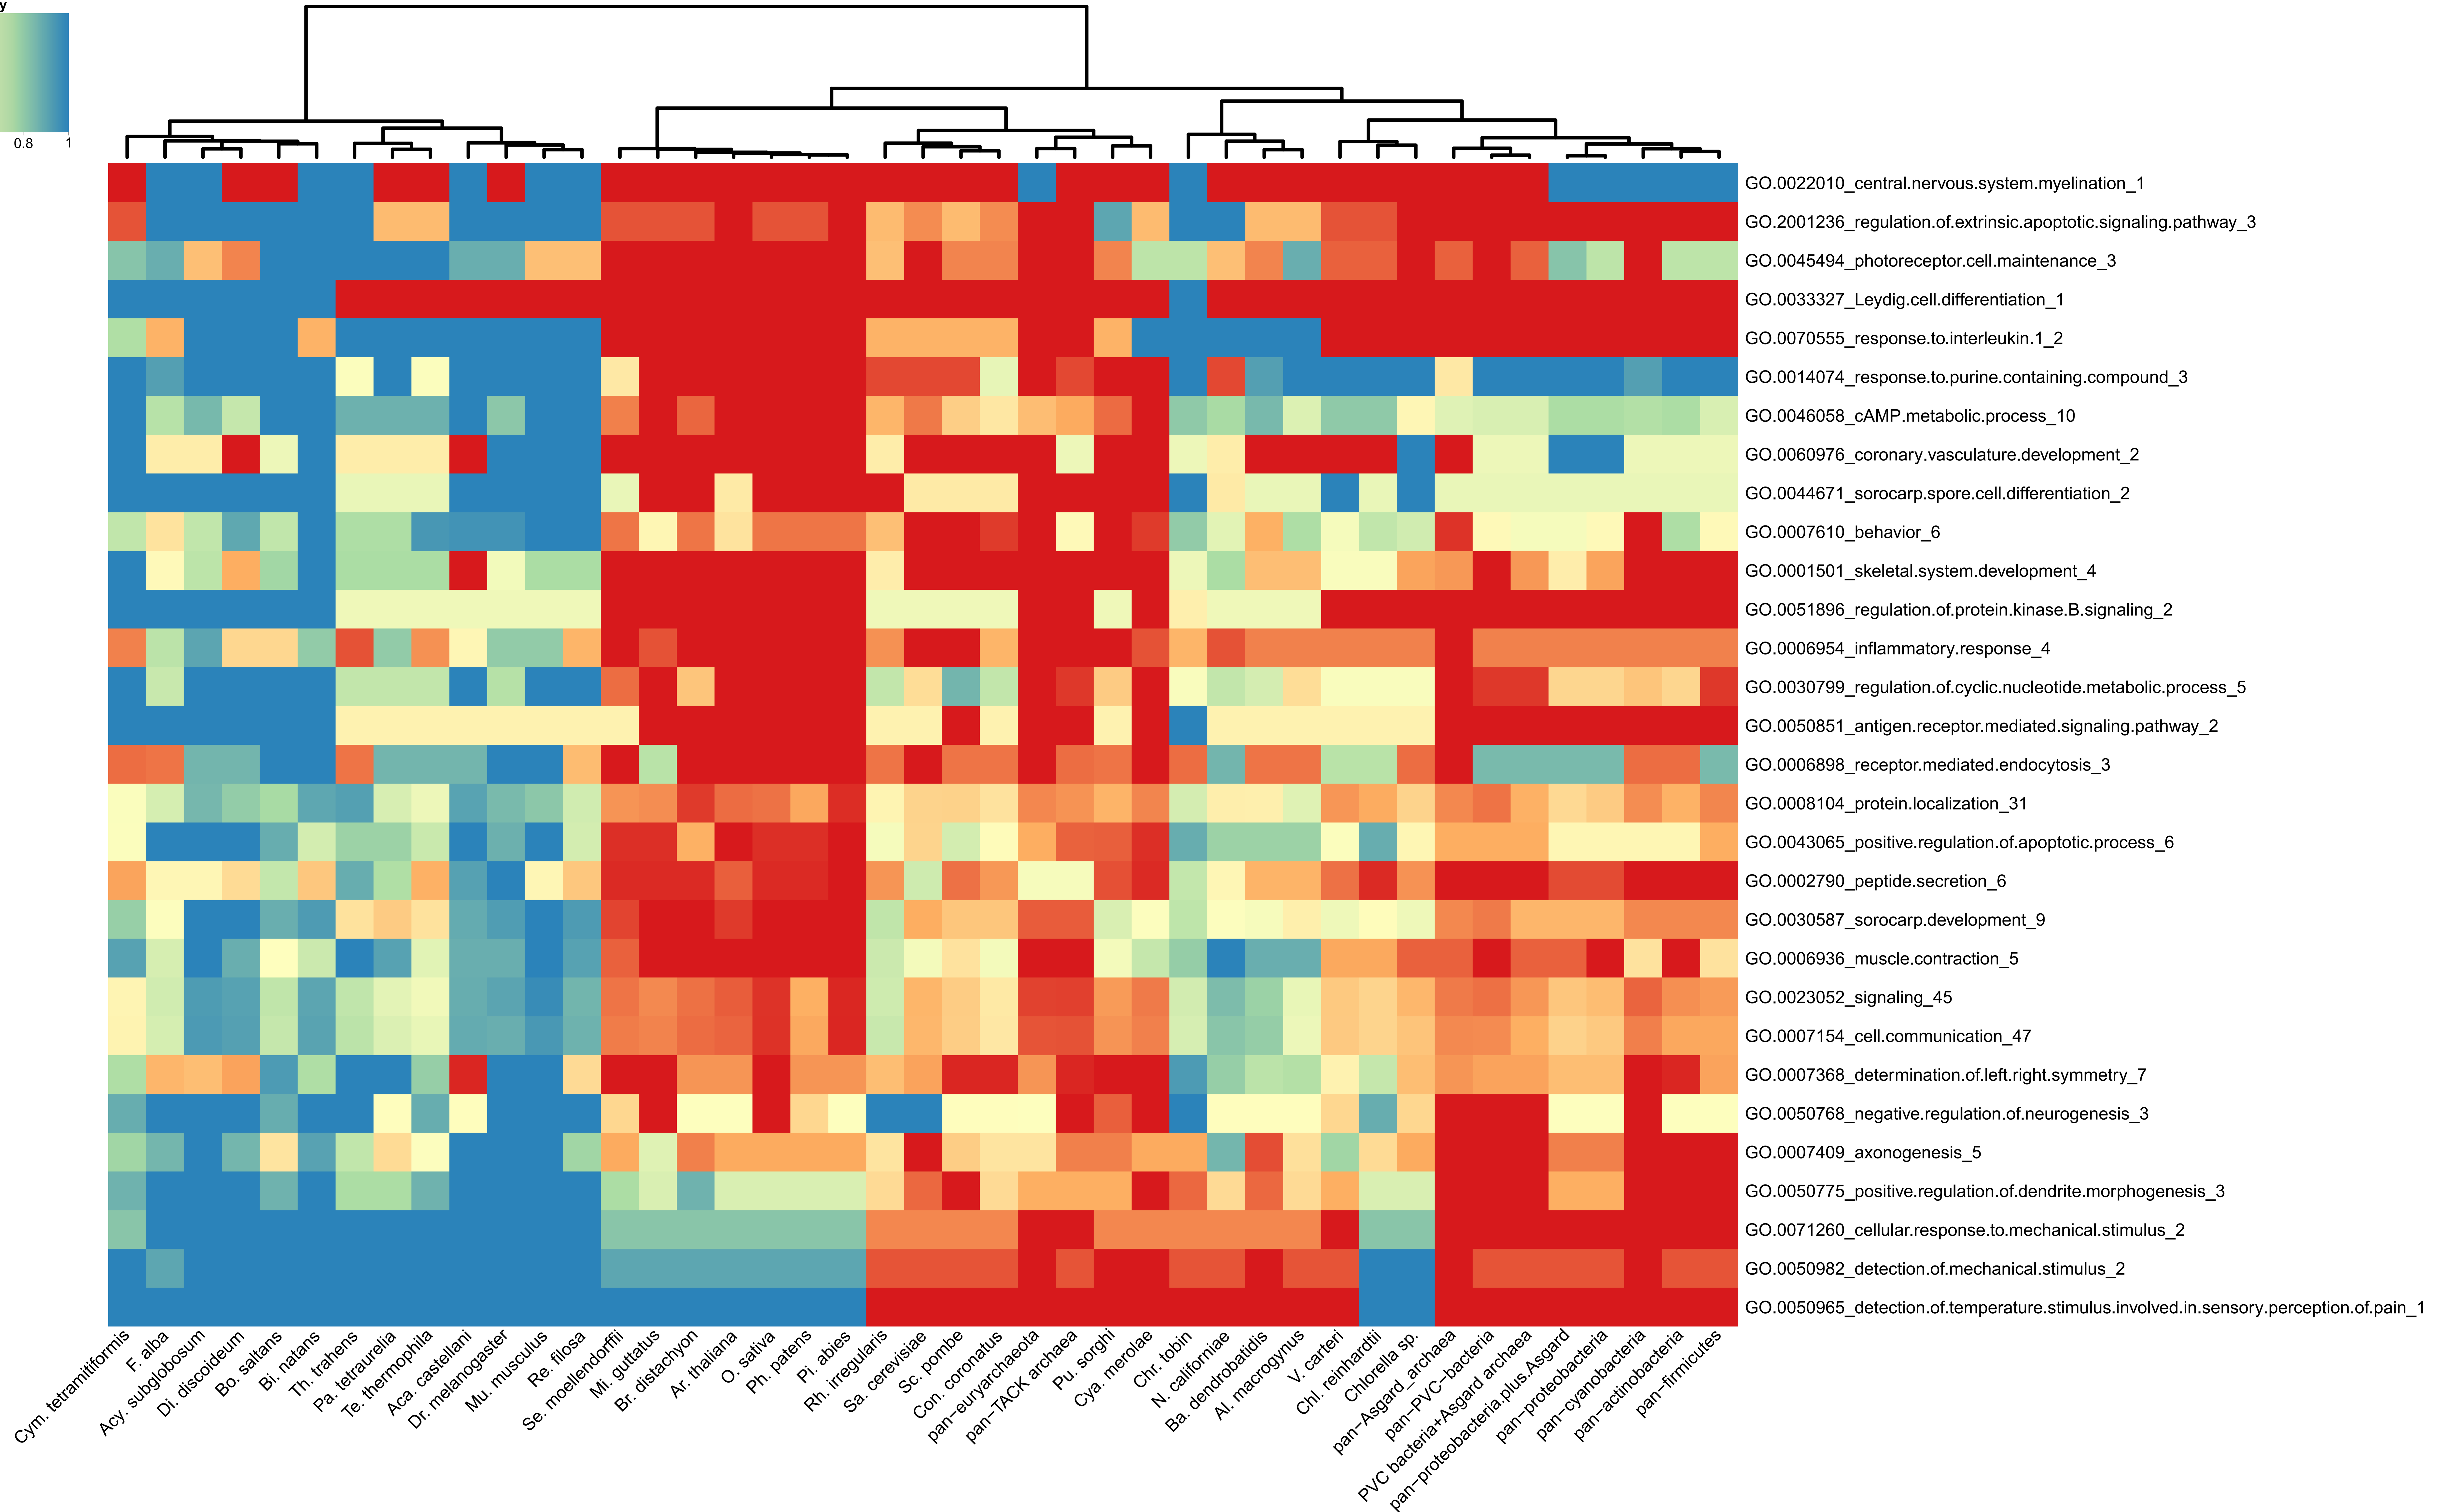

Supplement: 41559_2018_477_MOESM23_ESM.pdf [file 41559_2018_477_MOESM23_ESM.pdf]

Extended Data Figure 20

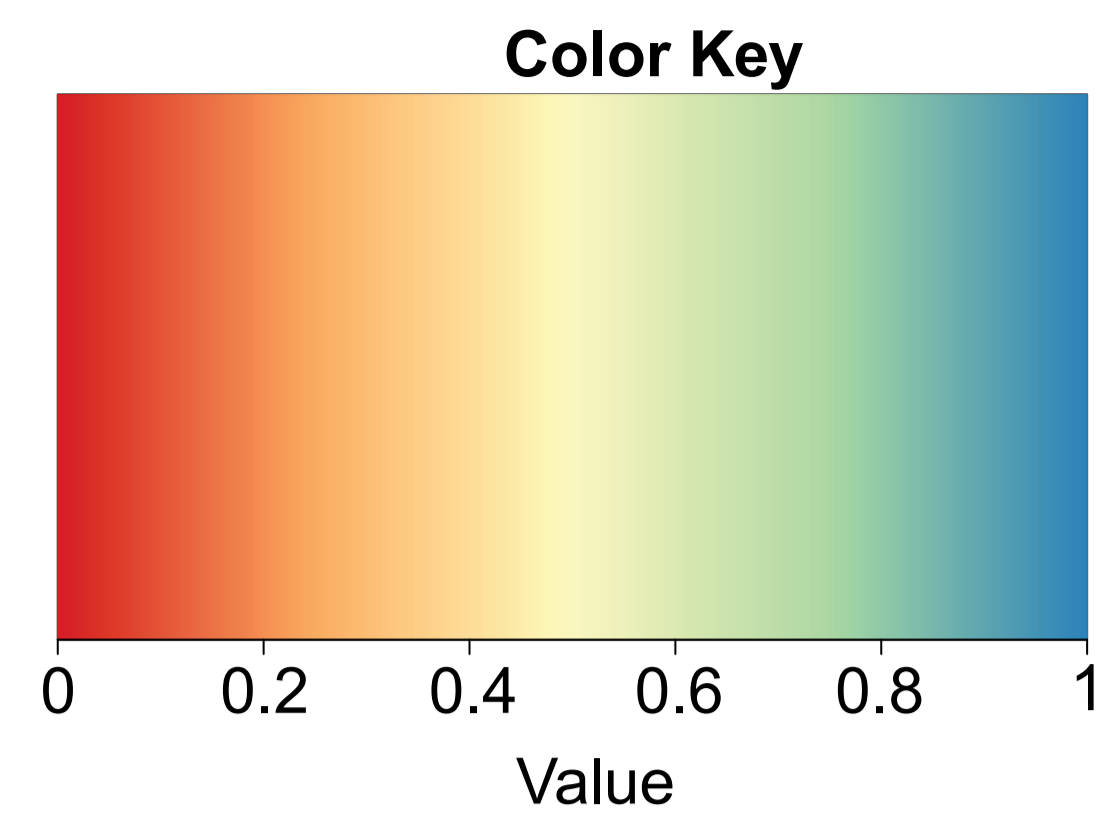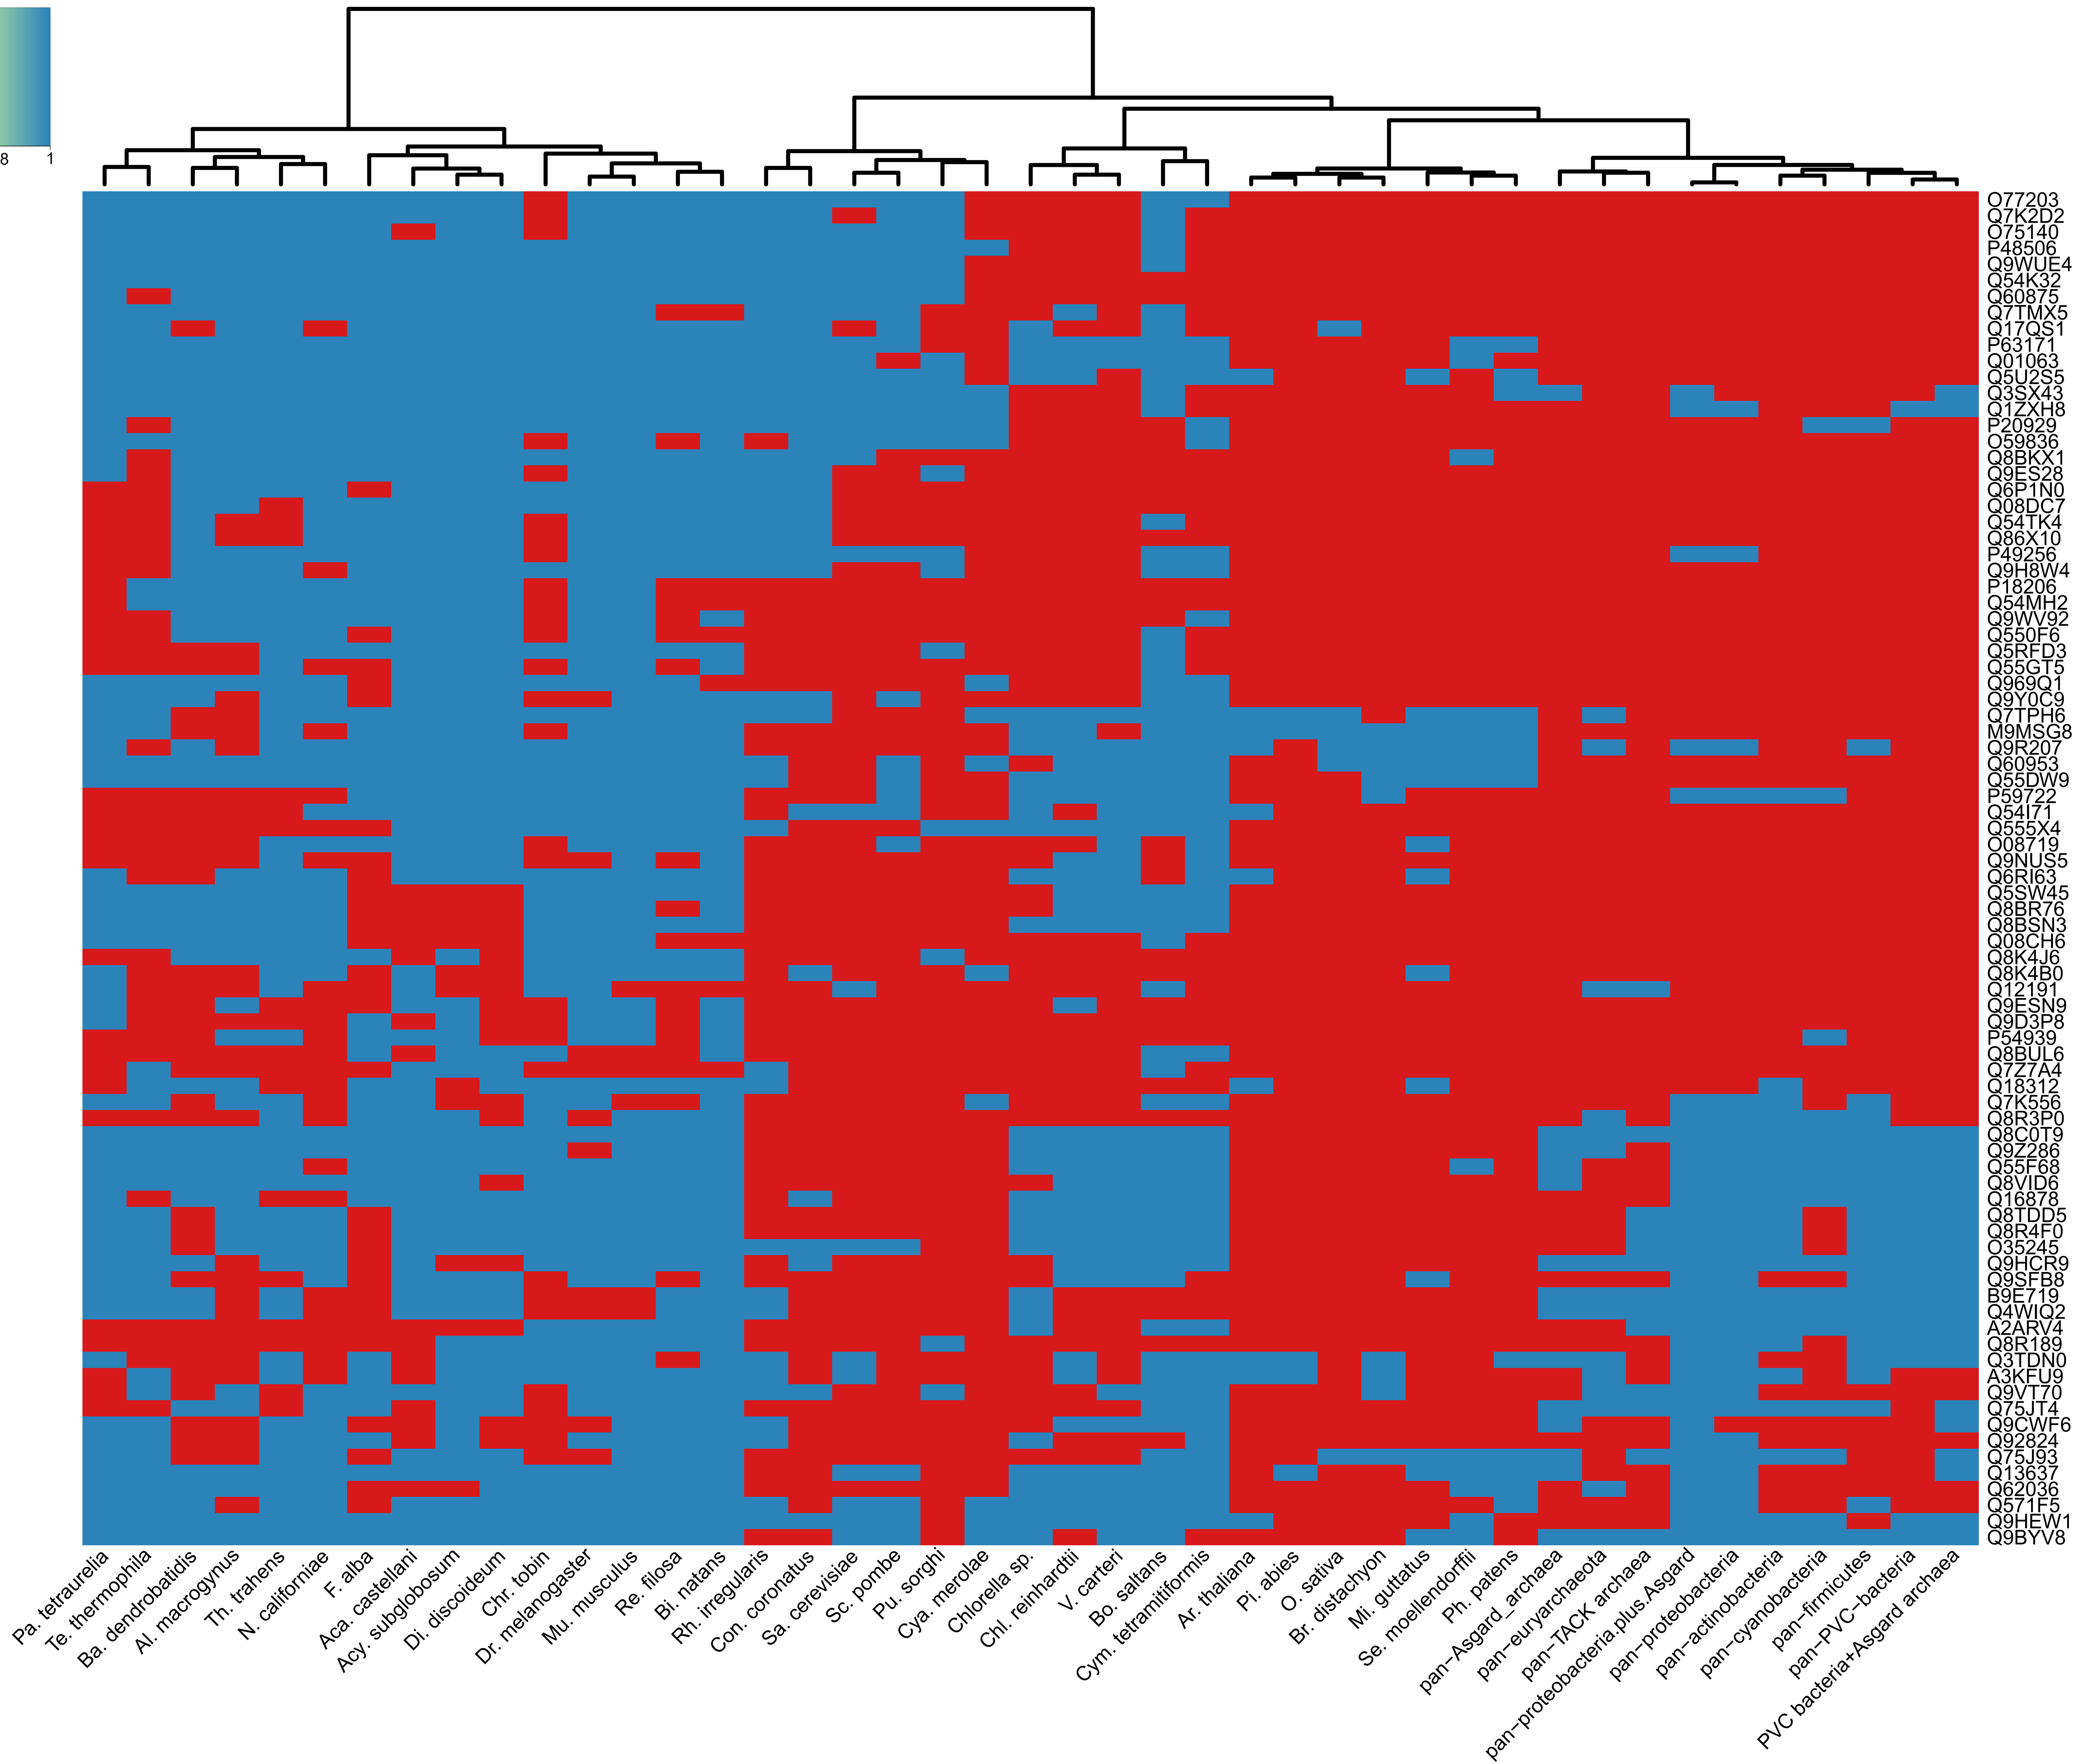

Supplement: 41559_2018_477_MOESM24_ESM.pdf [file 41559_2018_477_MOESM24_ESM.pdf]

Extended Data Figure 1

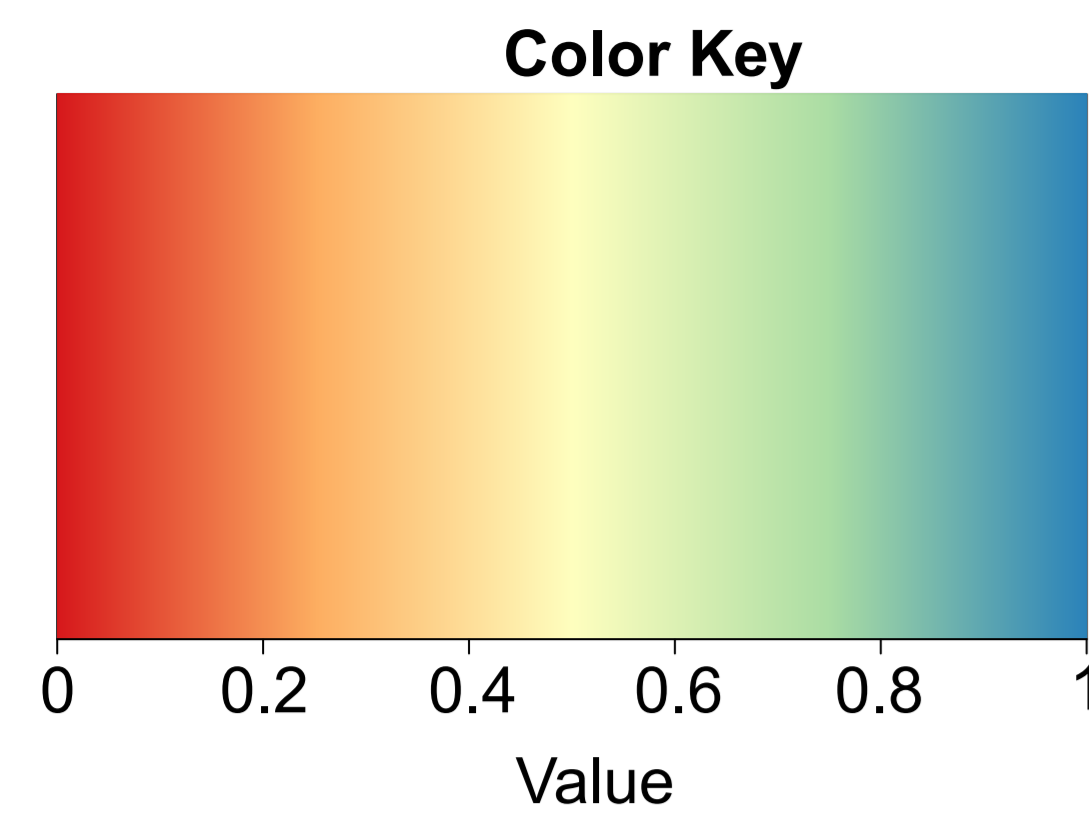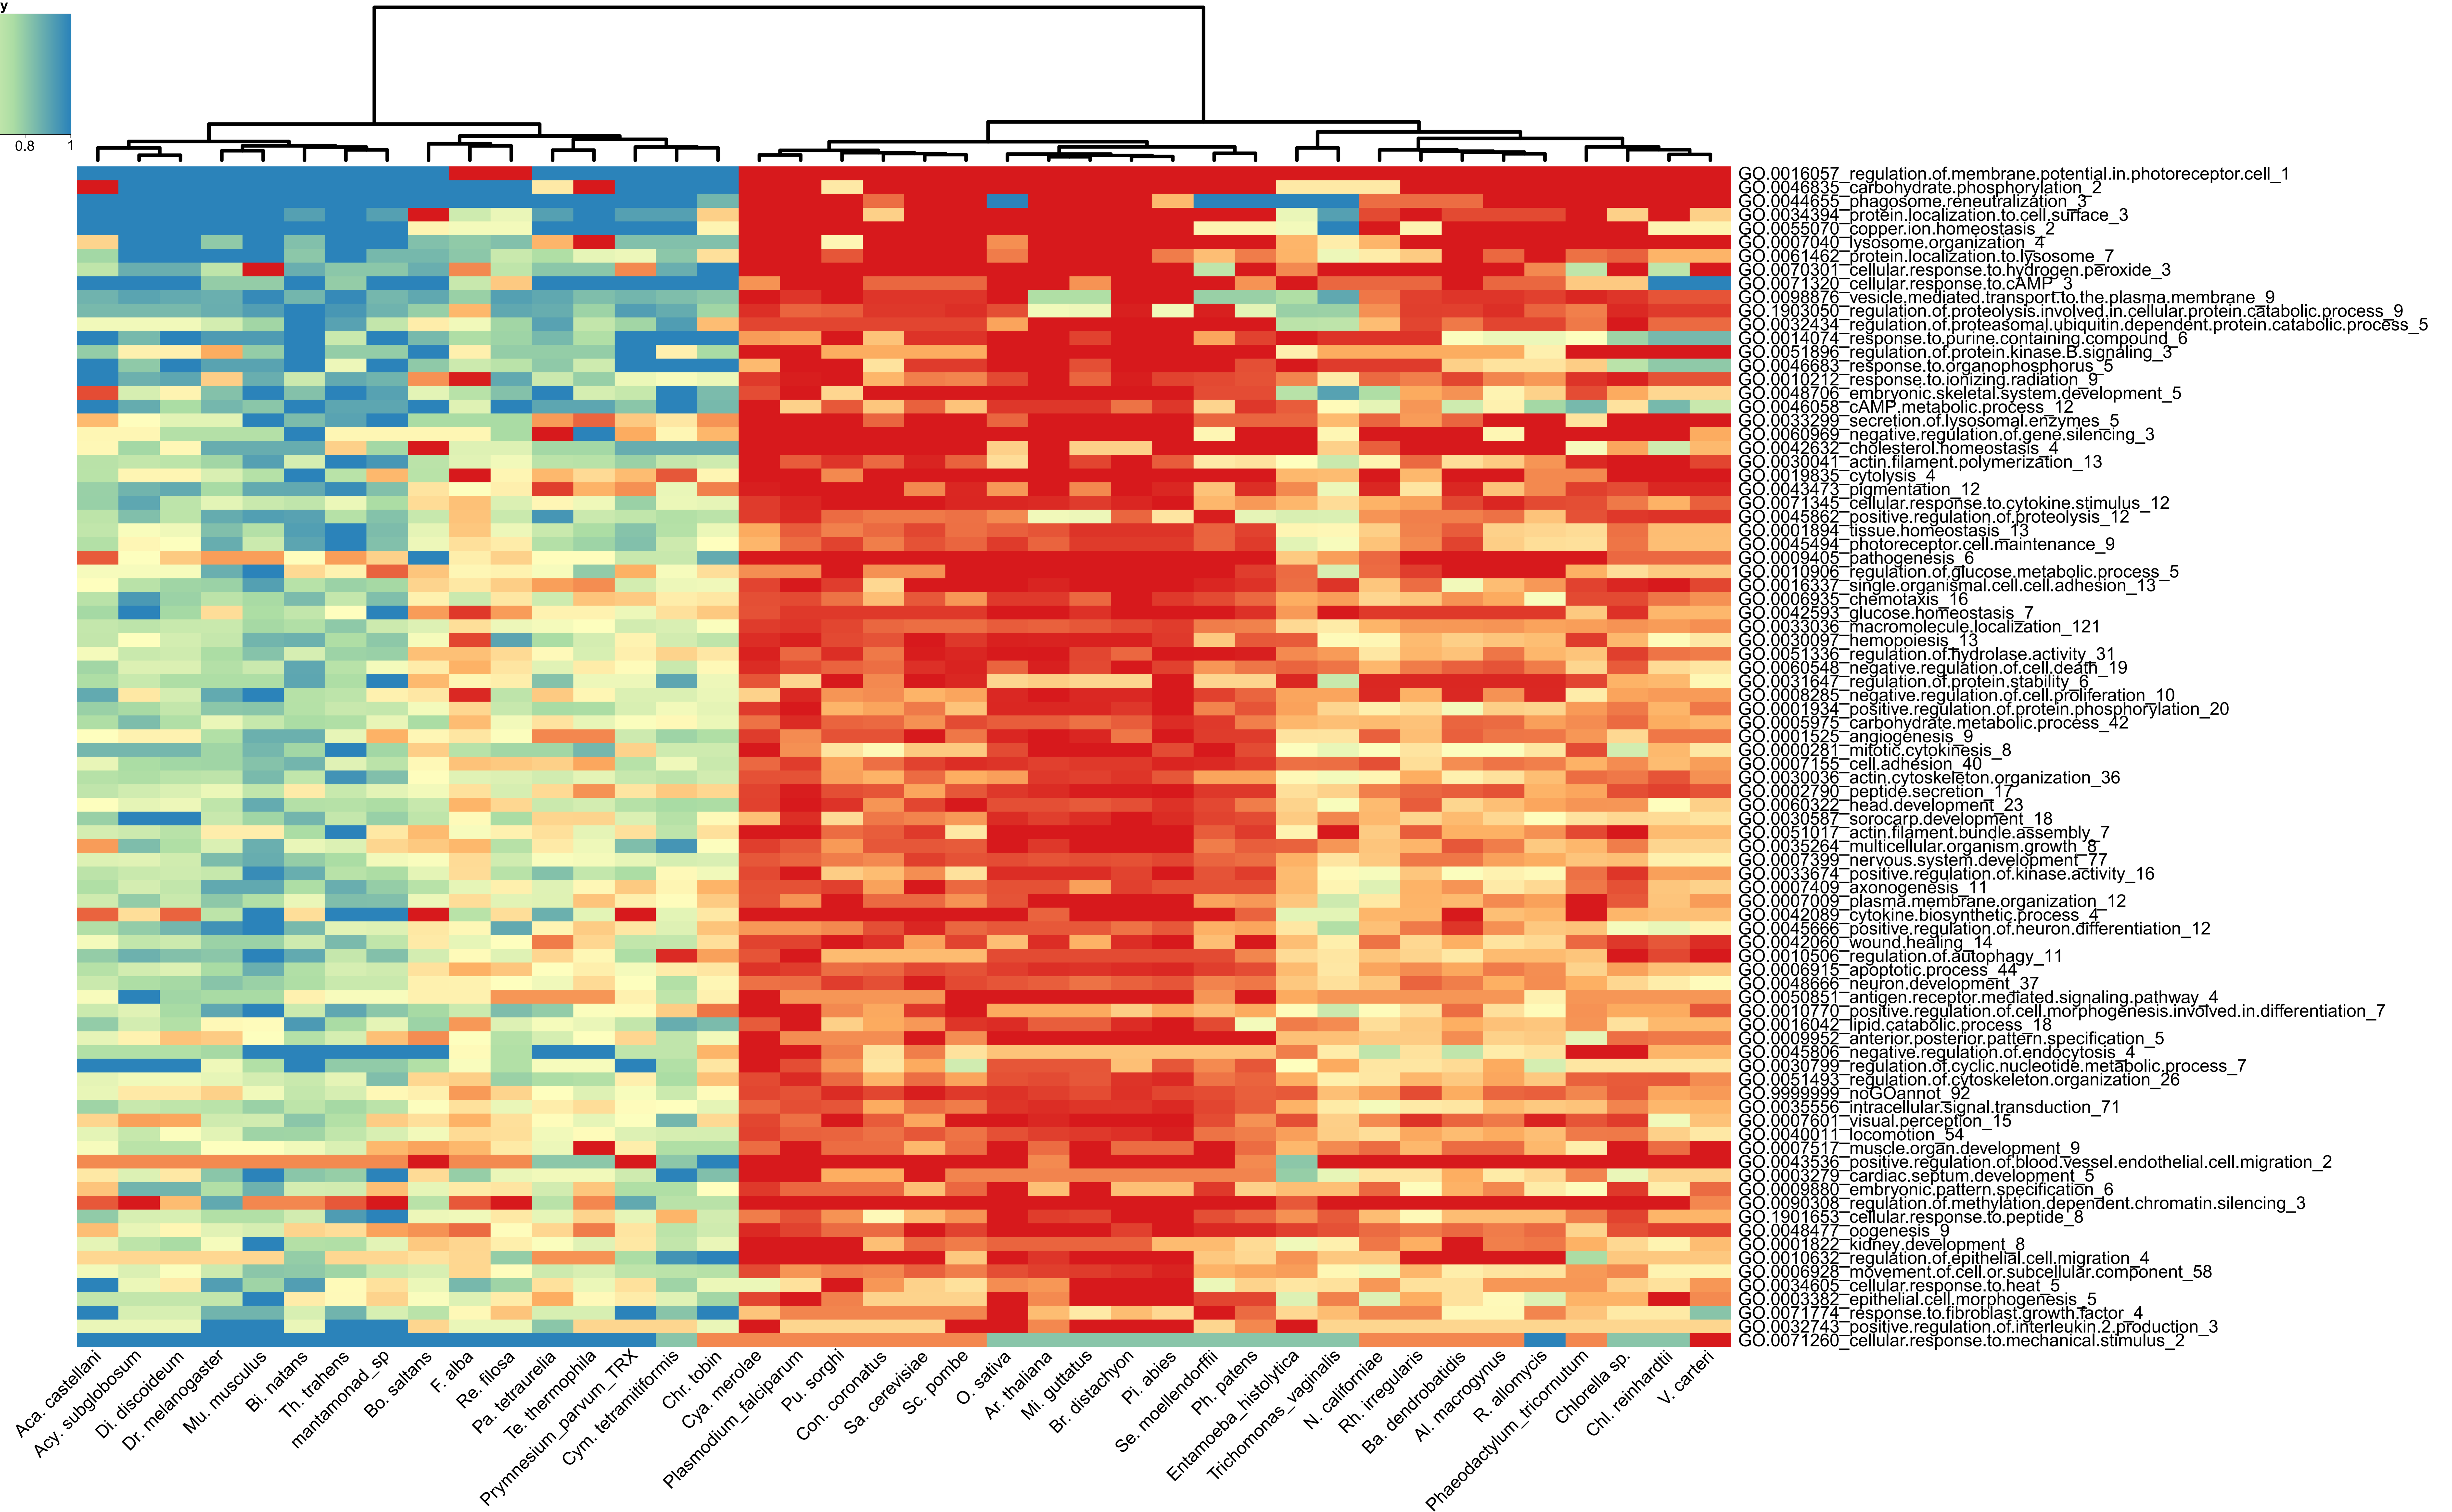

Supplement: 41559_2018_477_MOESM5_ESM.pdf [file 41559_2018_477_MOESM5_ESM.pdf]

Extended Data Figure 2

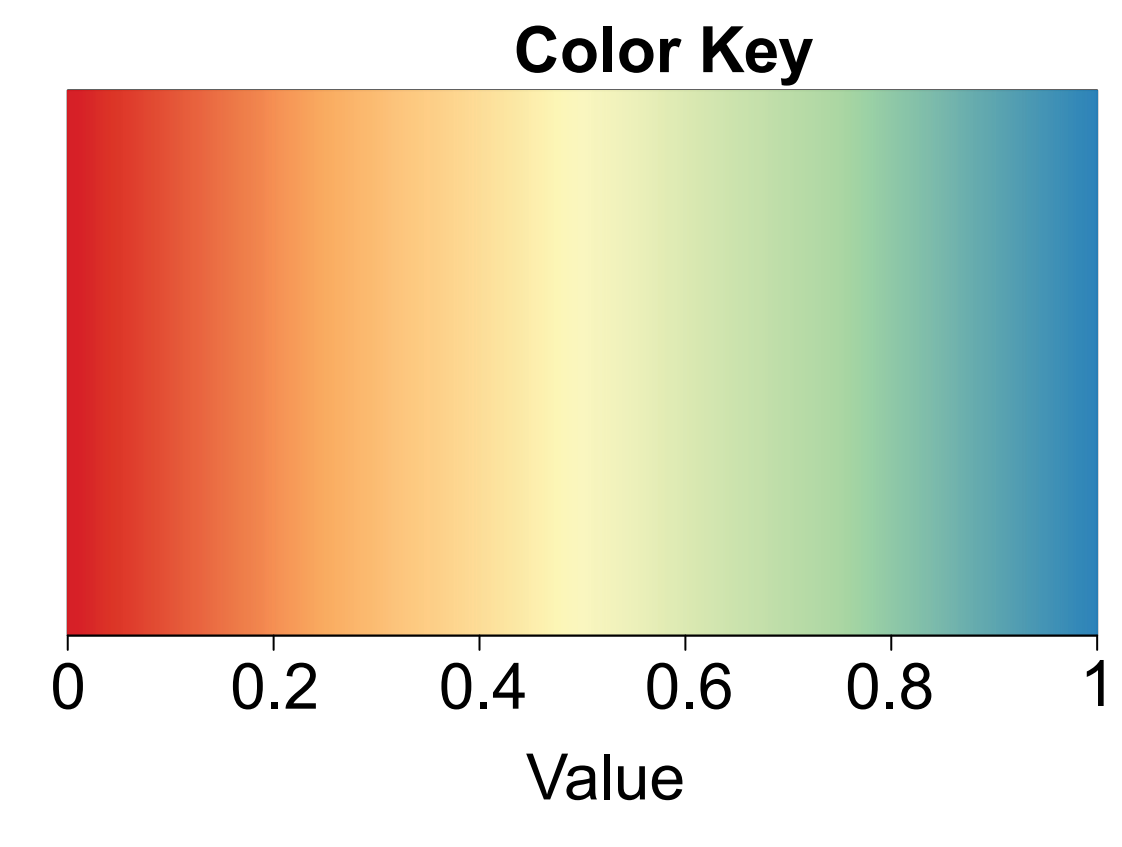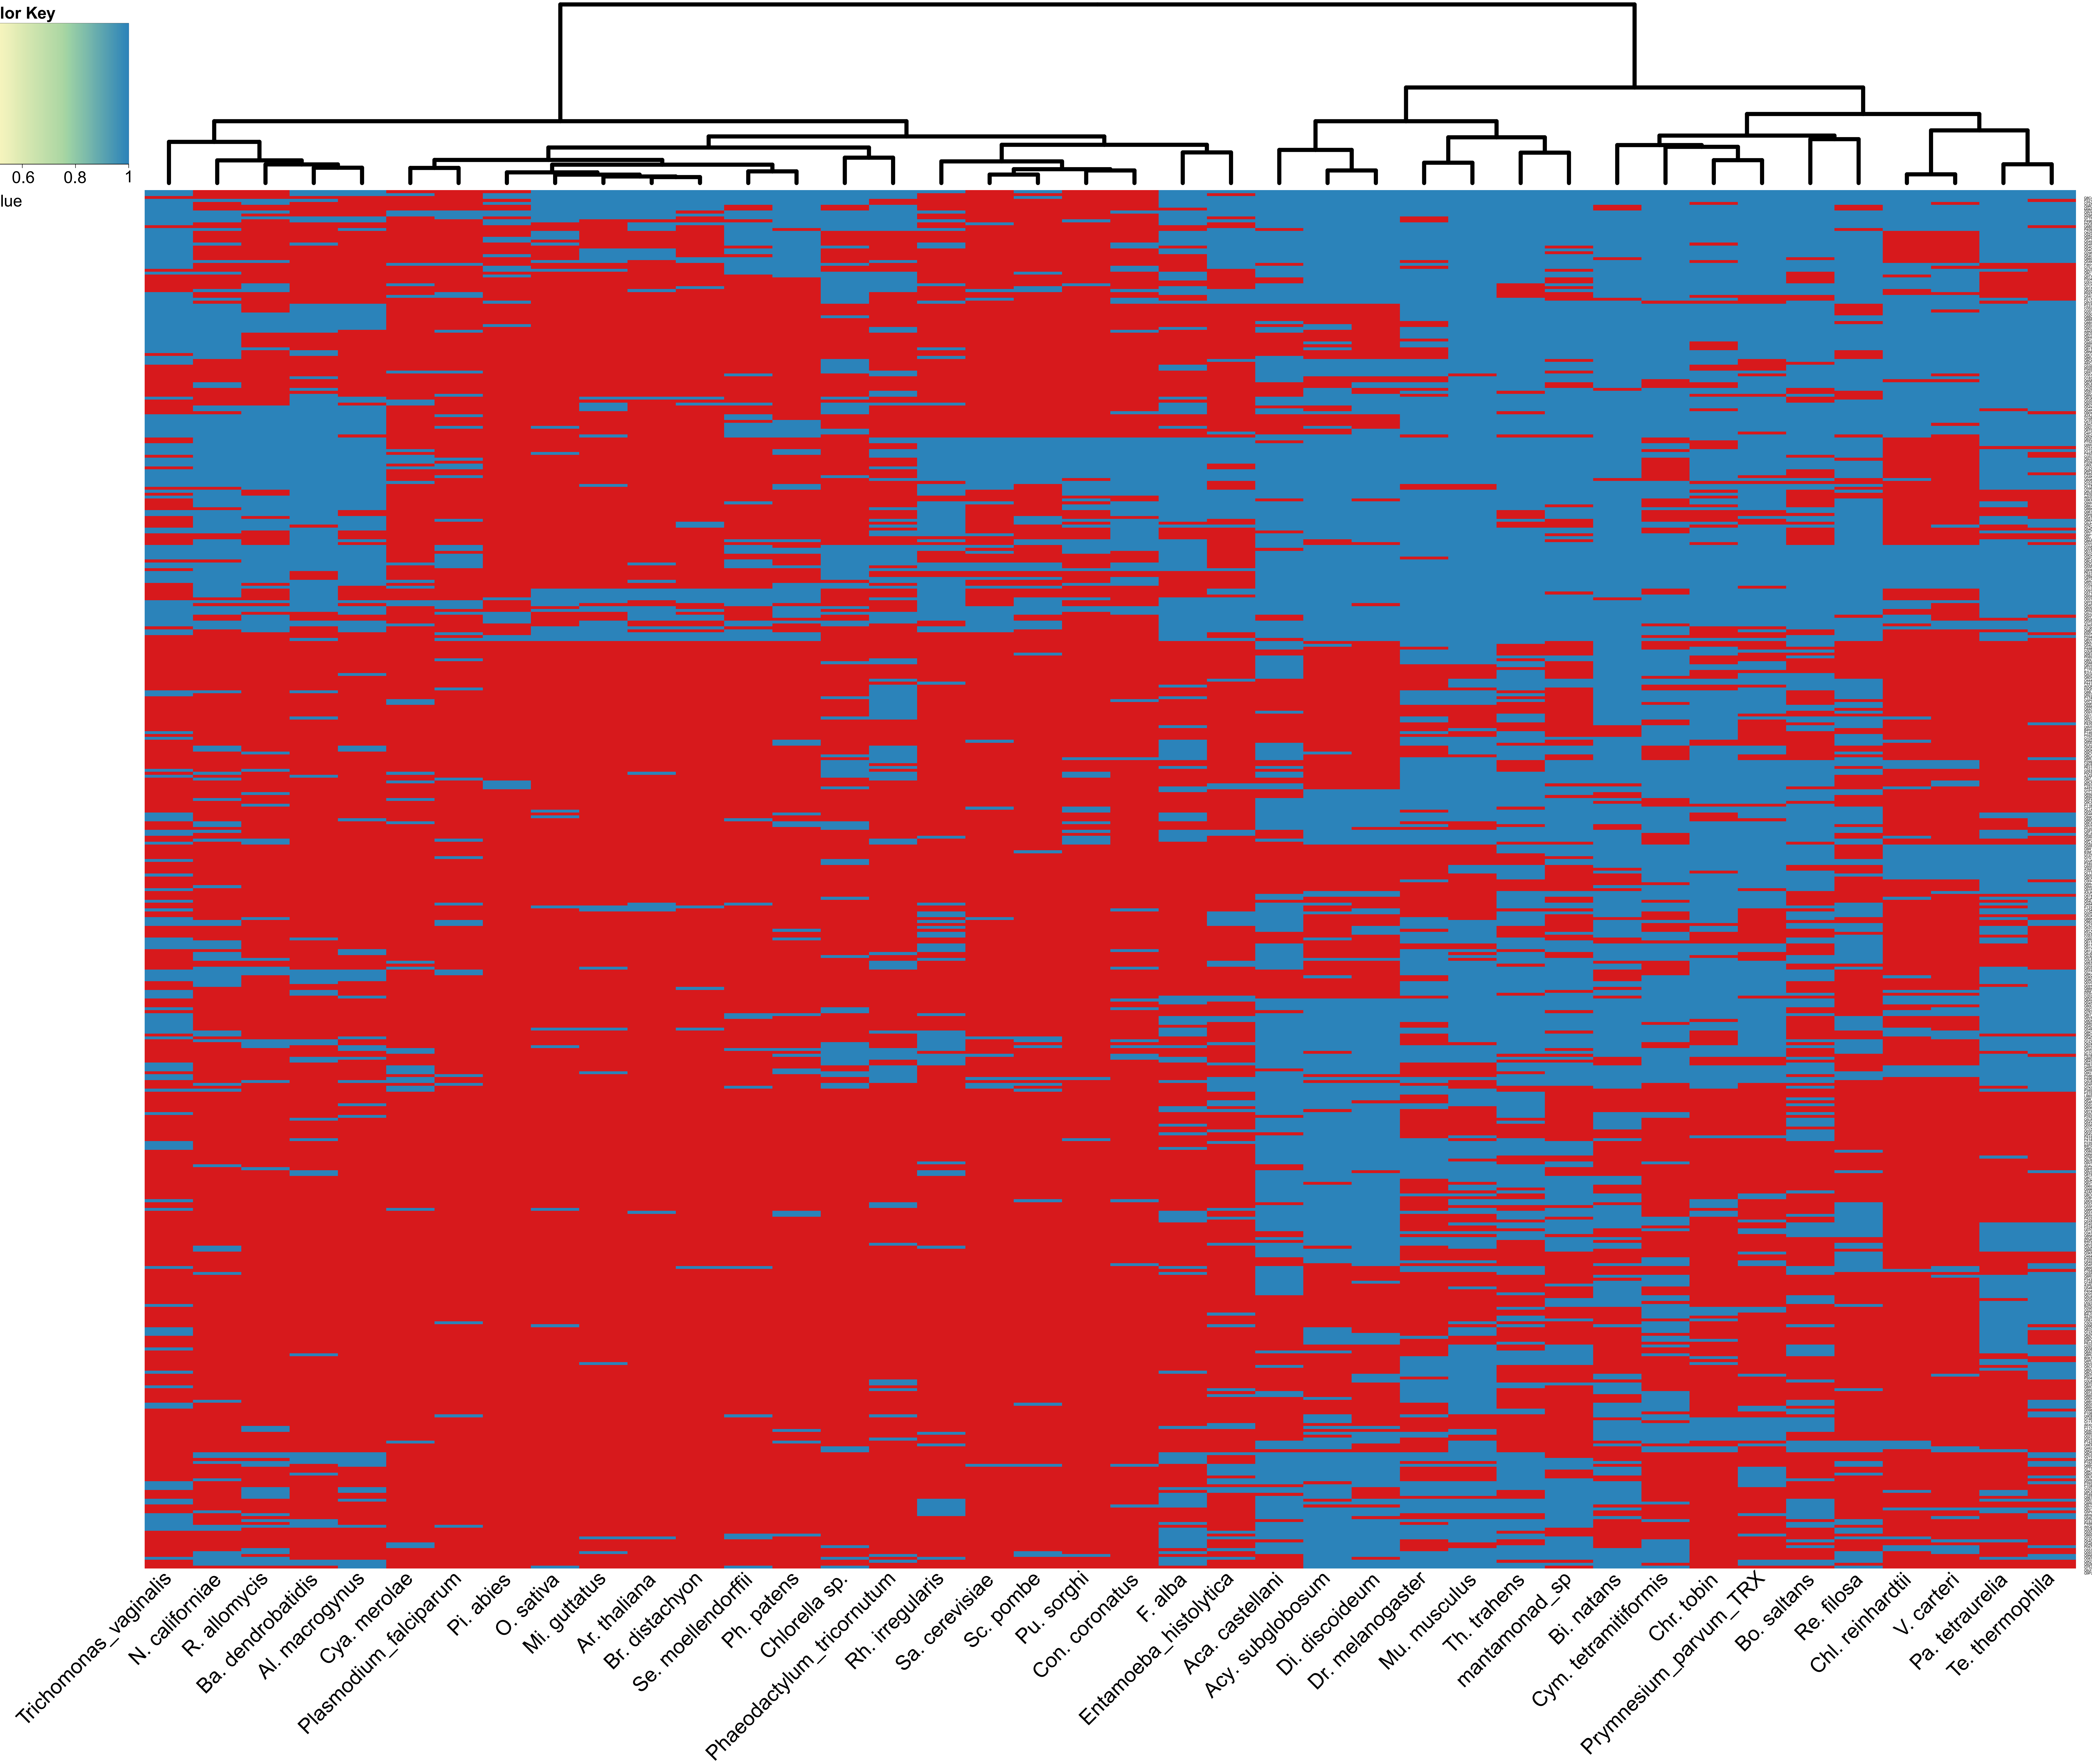

Supplement: 41559_2018_477_MOESM6_ESM.pdf [file 41559_2018_477_MOESM6_ESM.pdf]

Extended Data Figure 3

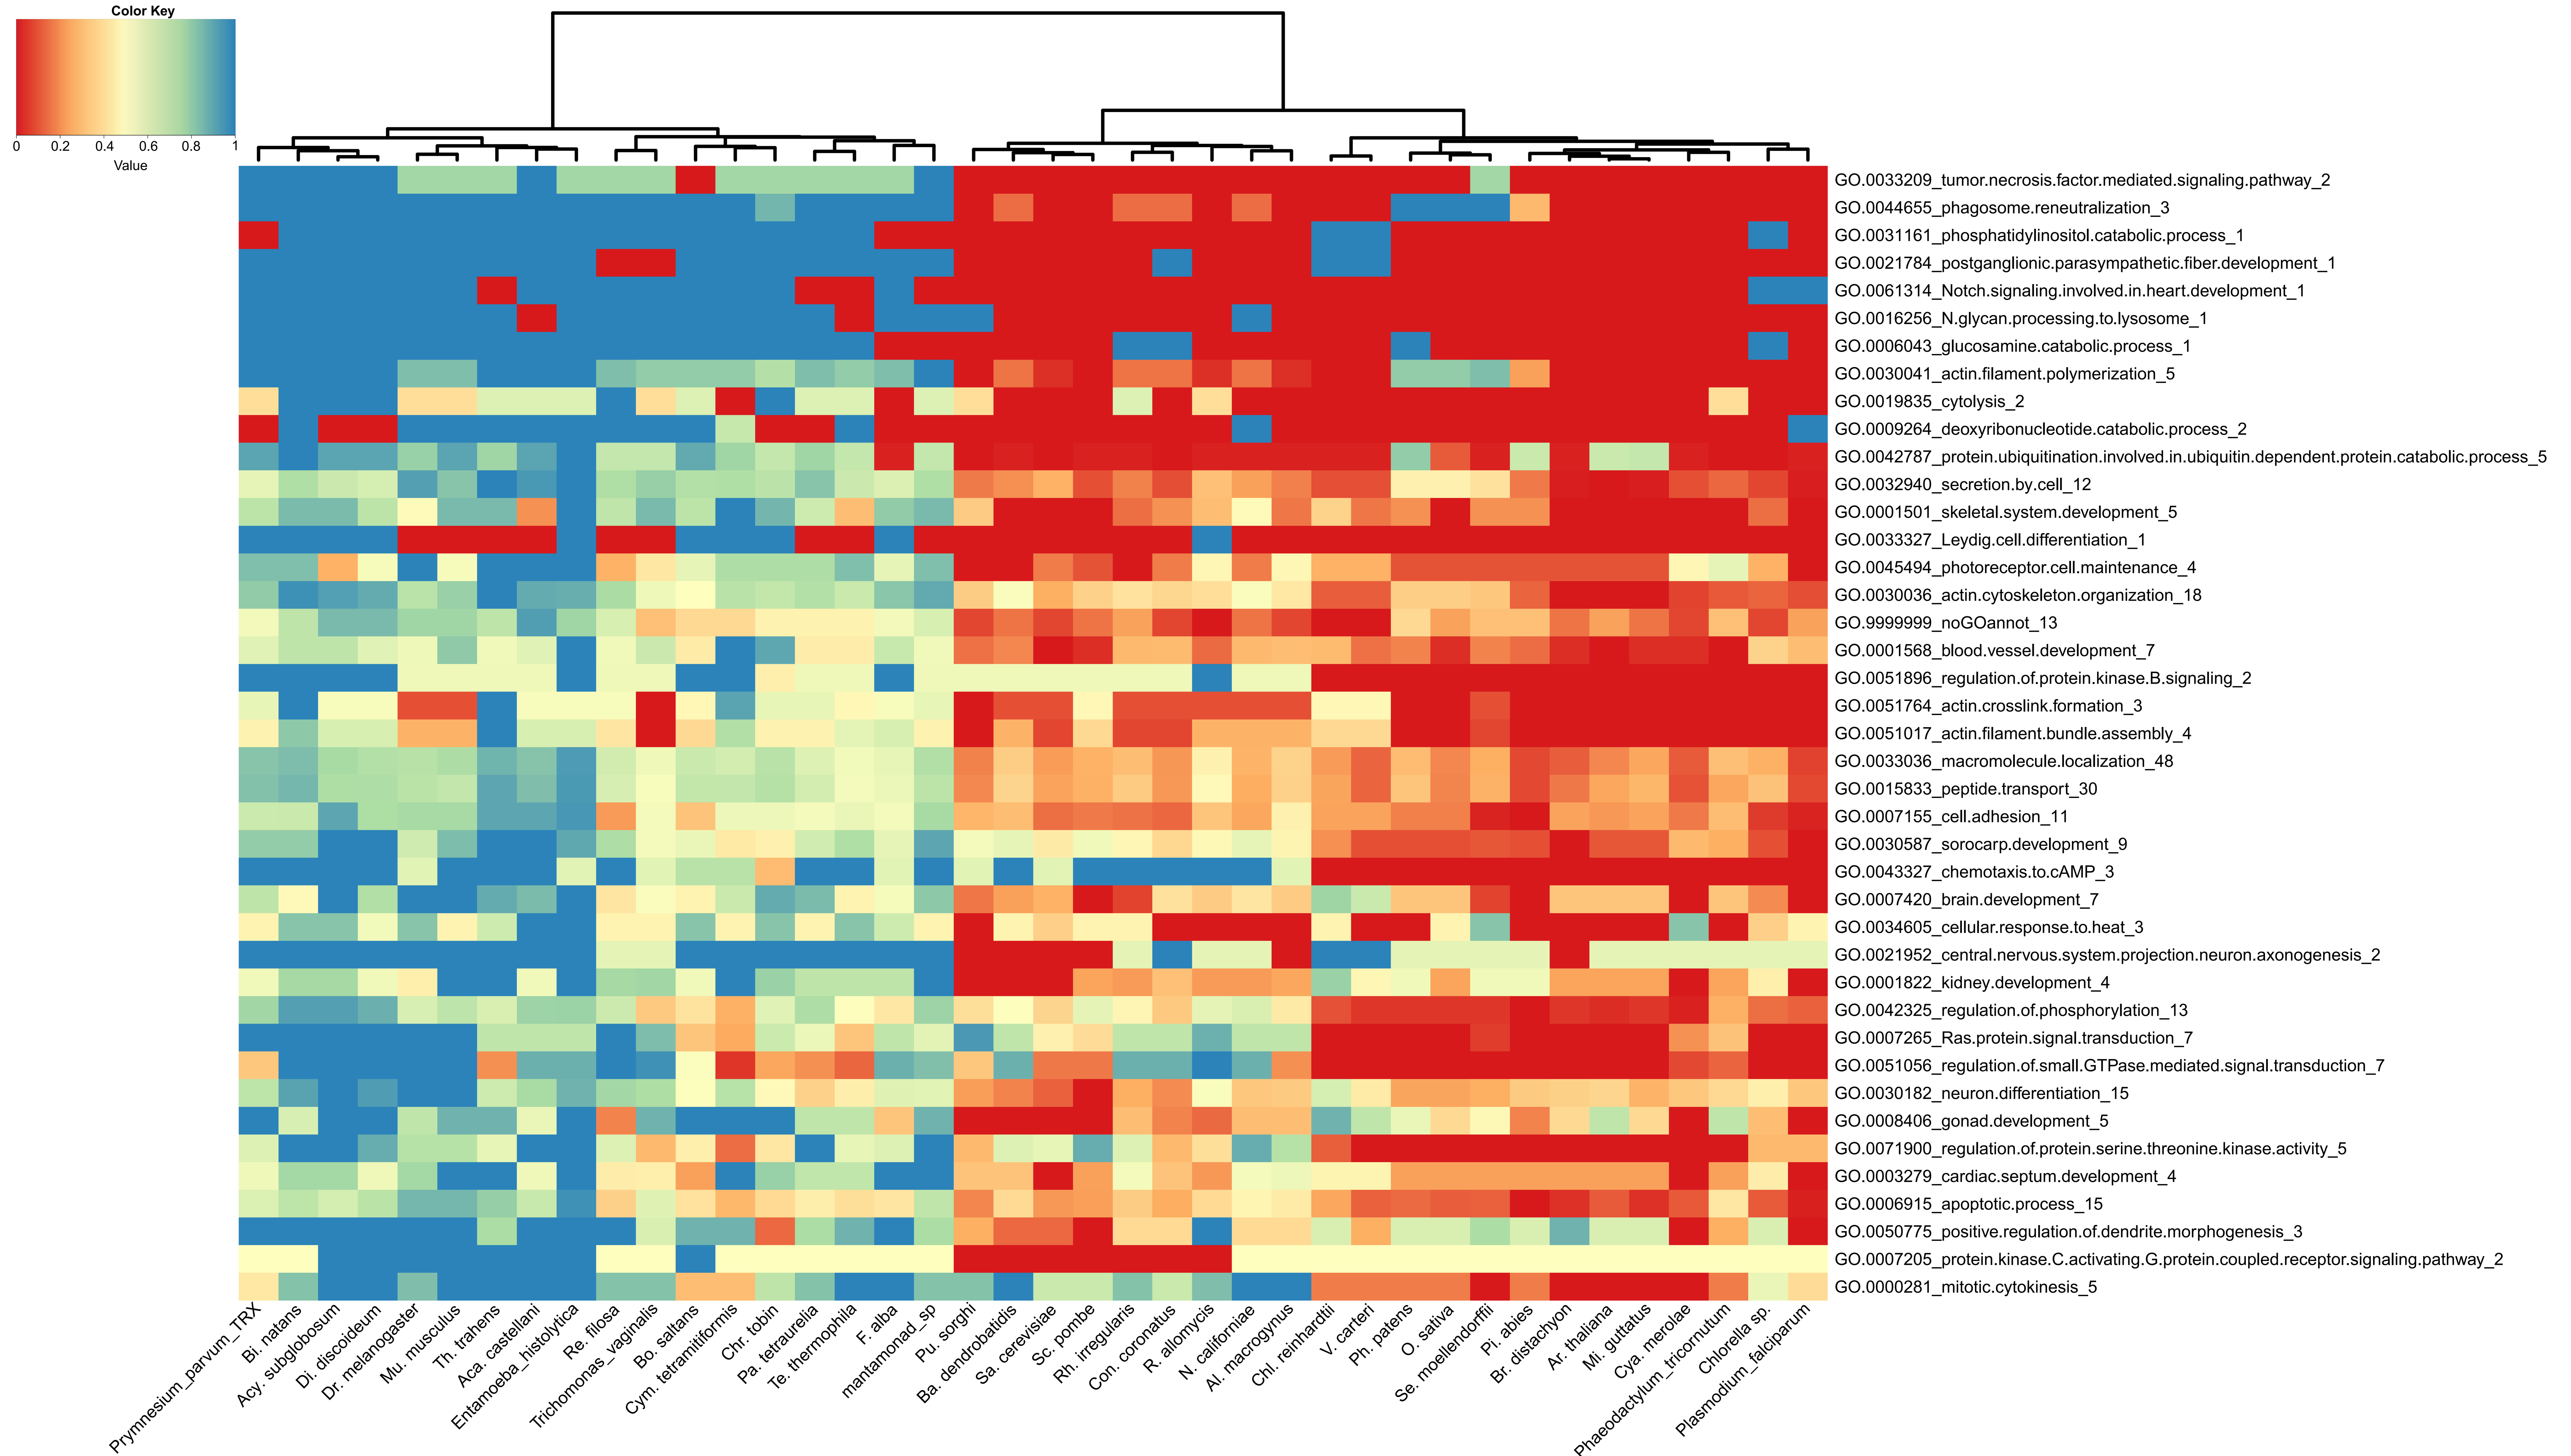

Supplement: 41559_2018_477_MOESM7_ESM.pdf [file 41559_2018_477_MOESM7_ESM.pdf]

Extended Data Figure 4

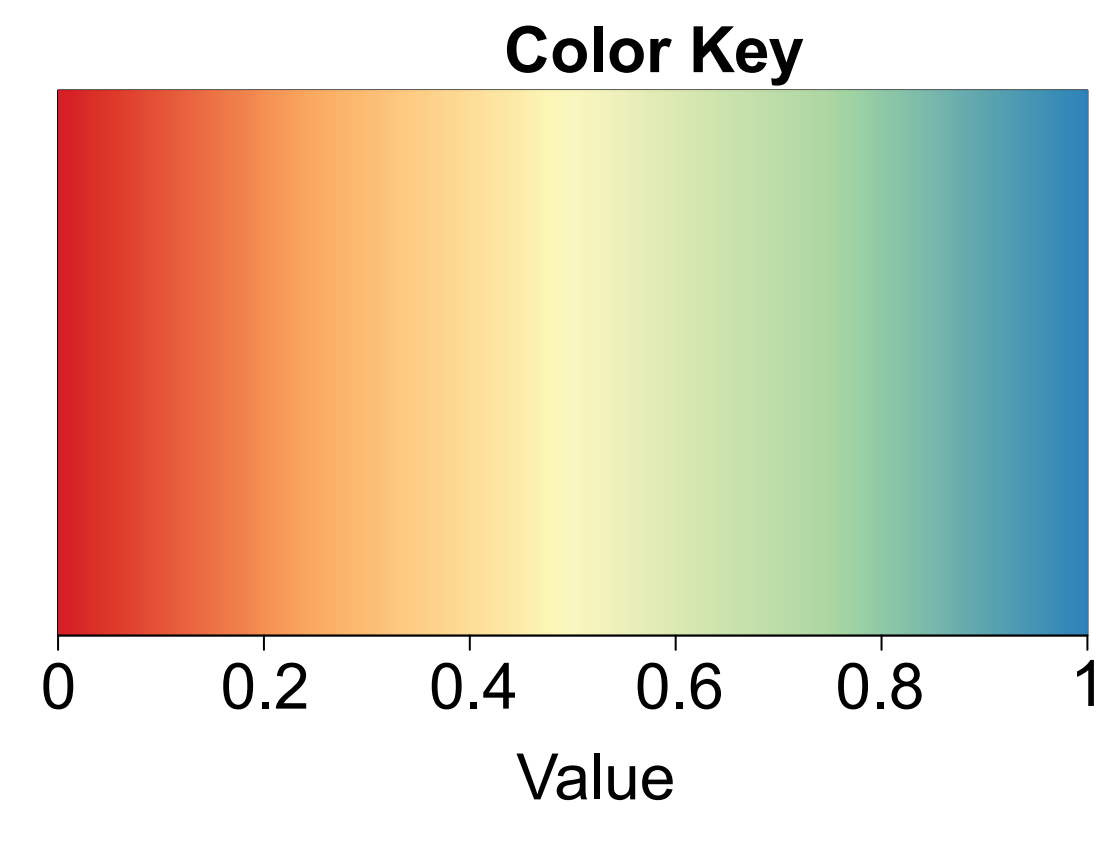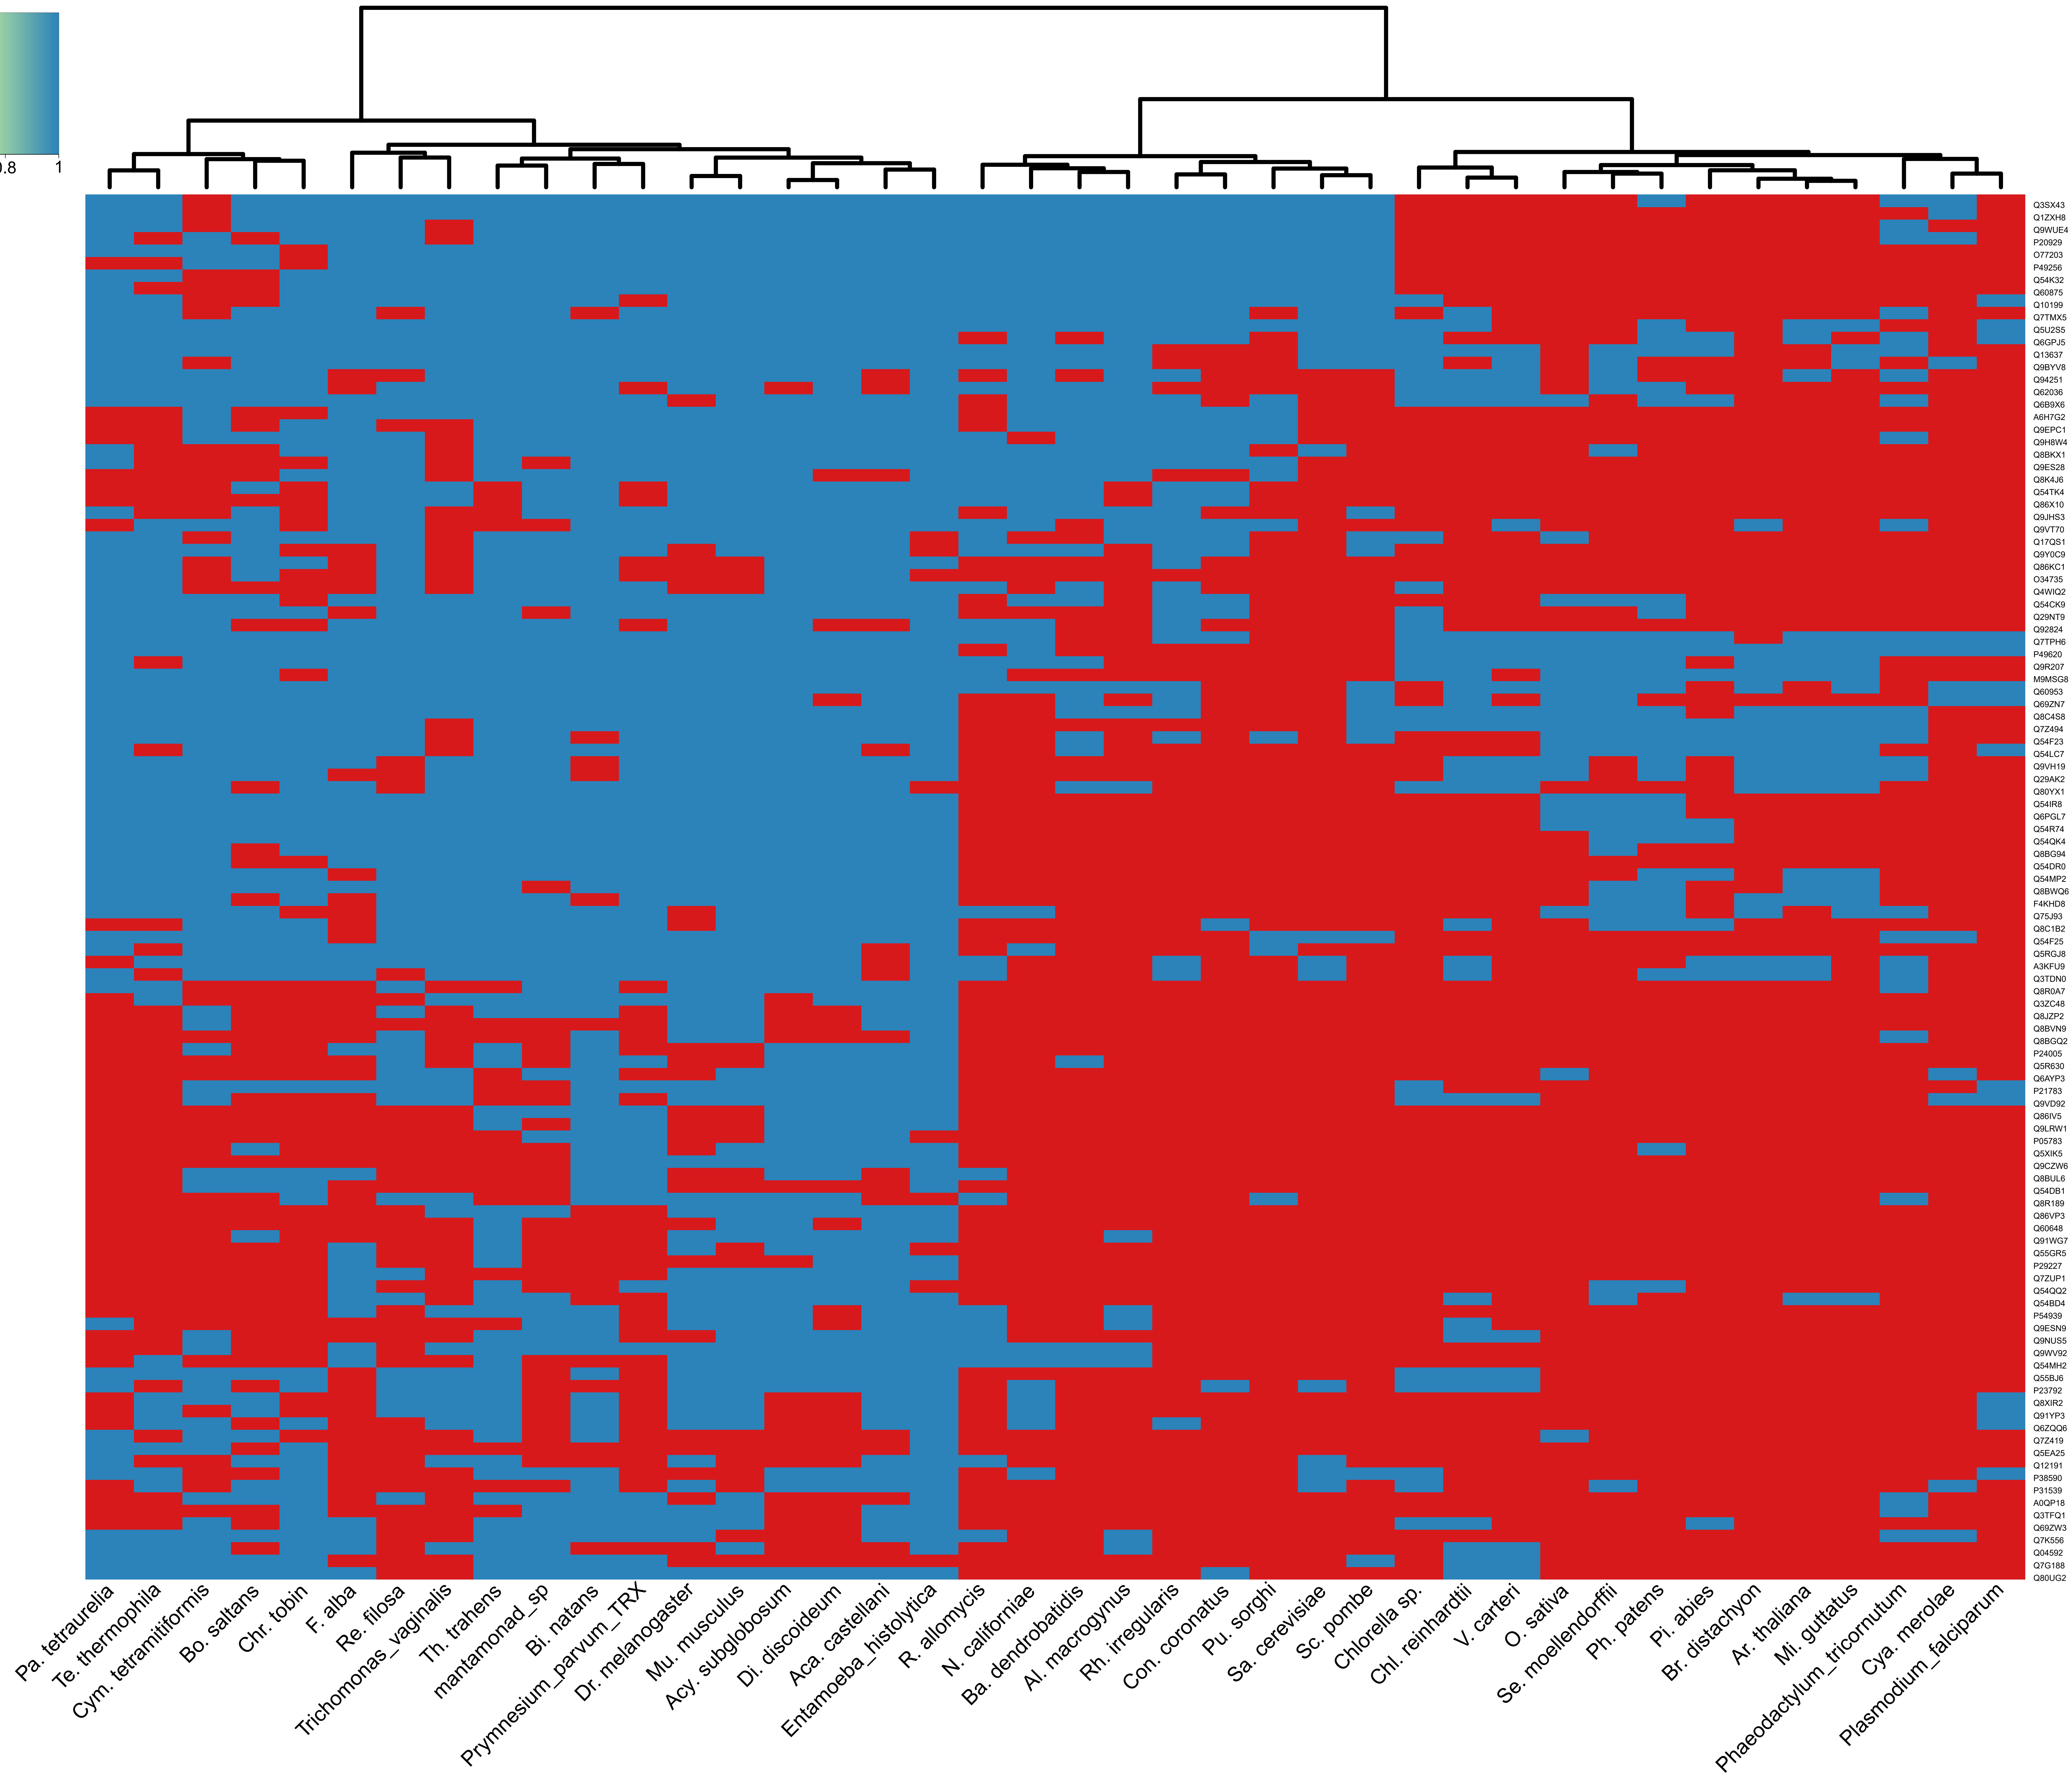

Supplement: 41559_2018_477_MOESM8_ESM.pdf [file 41559_2018_477_MOESM8_ESM.pdf]

Extended Data Figure 5

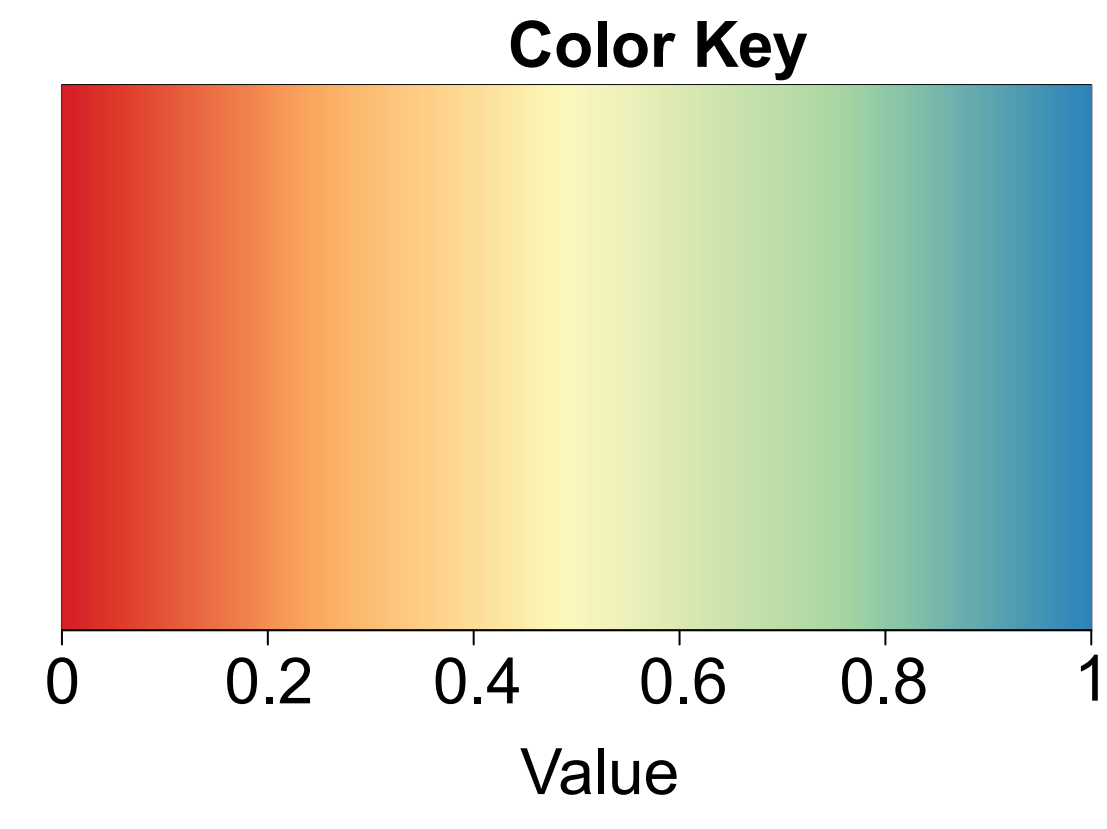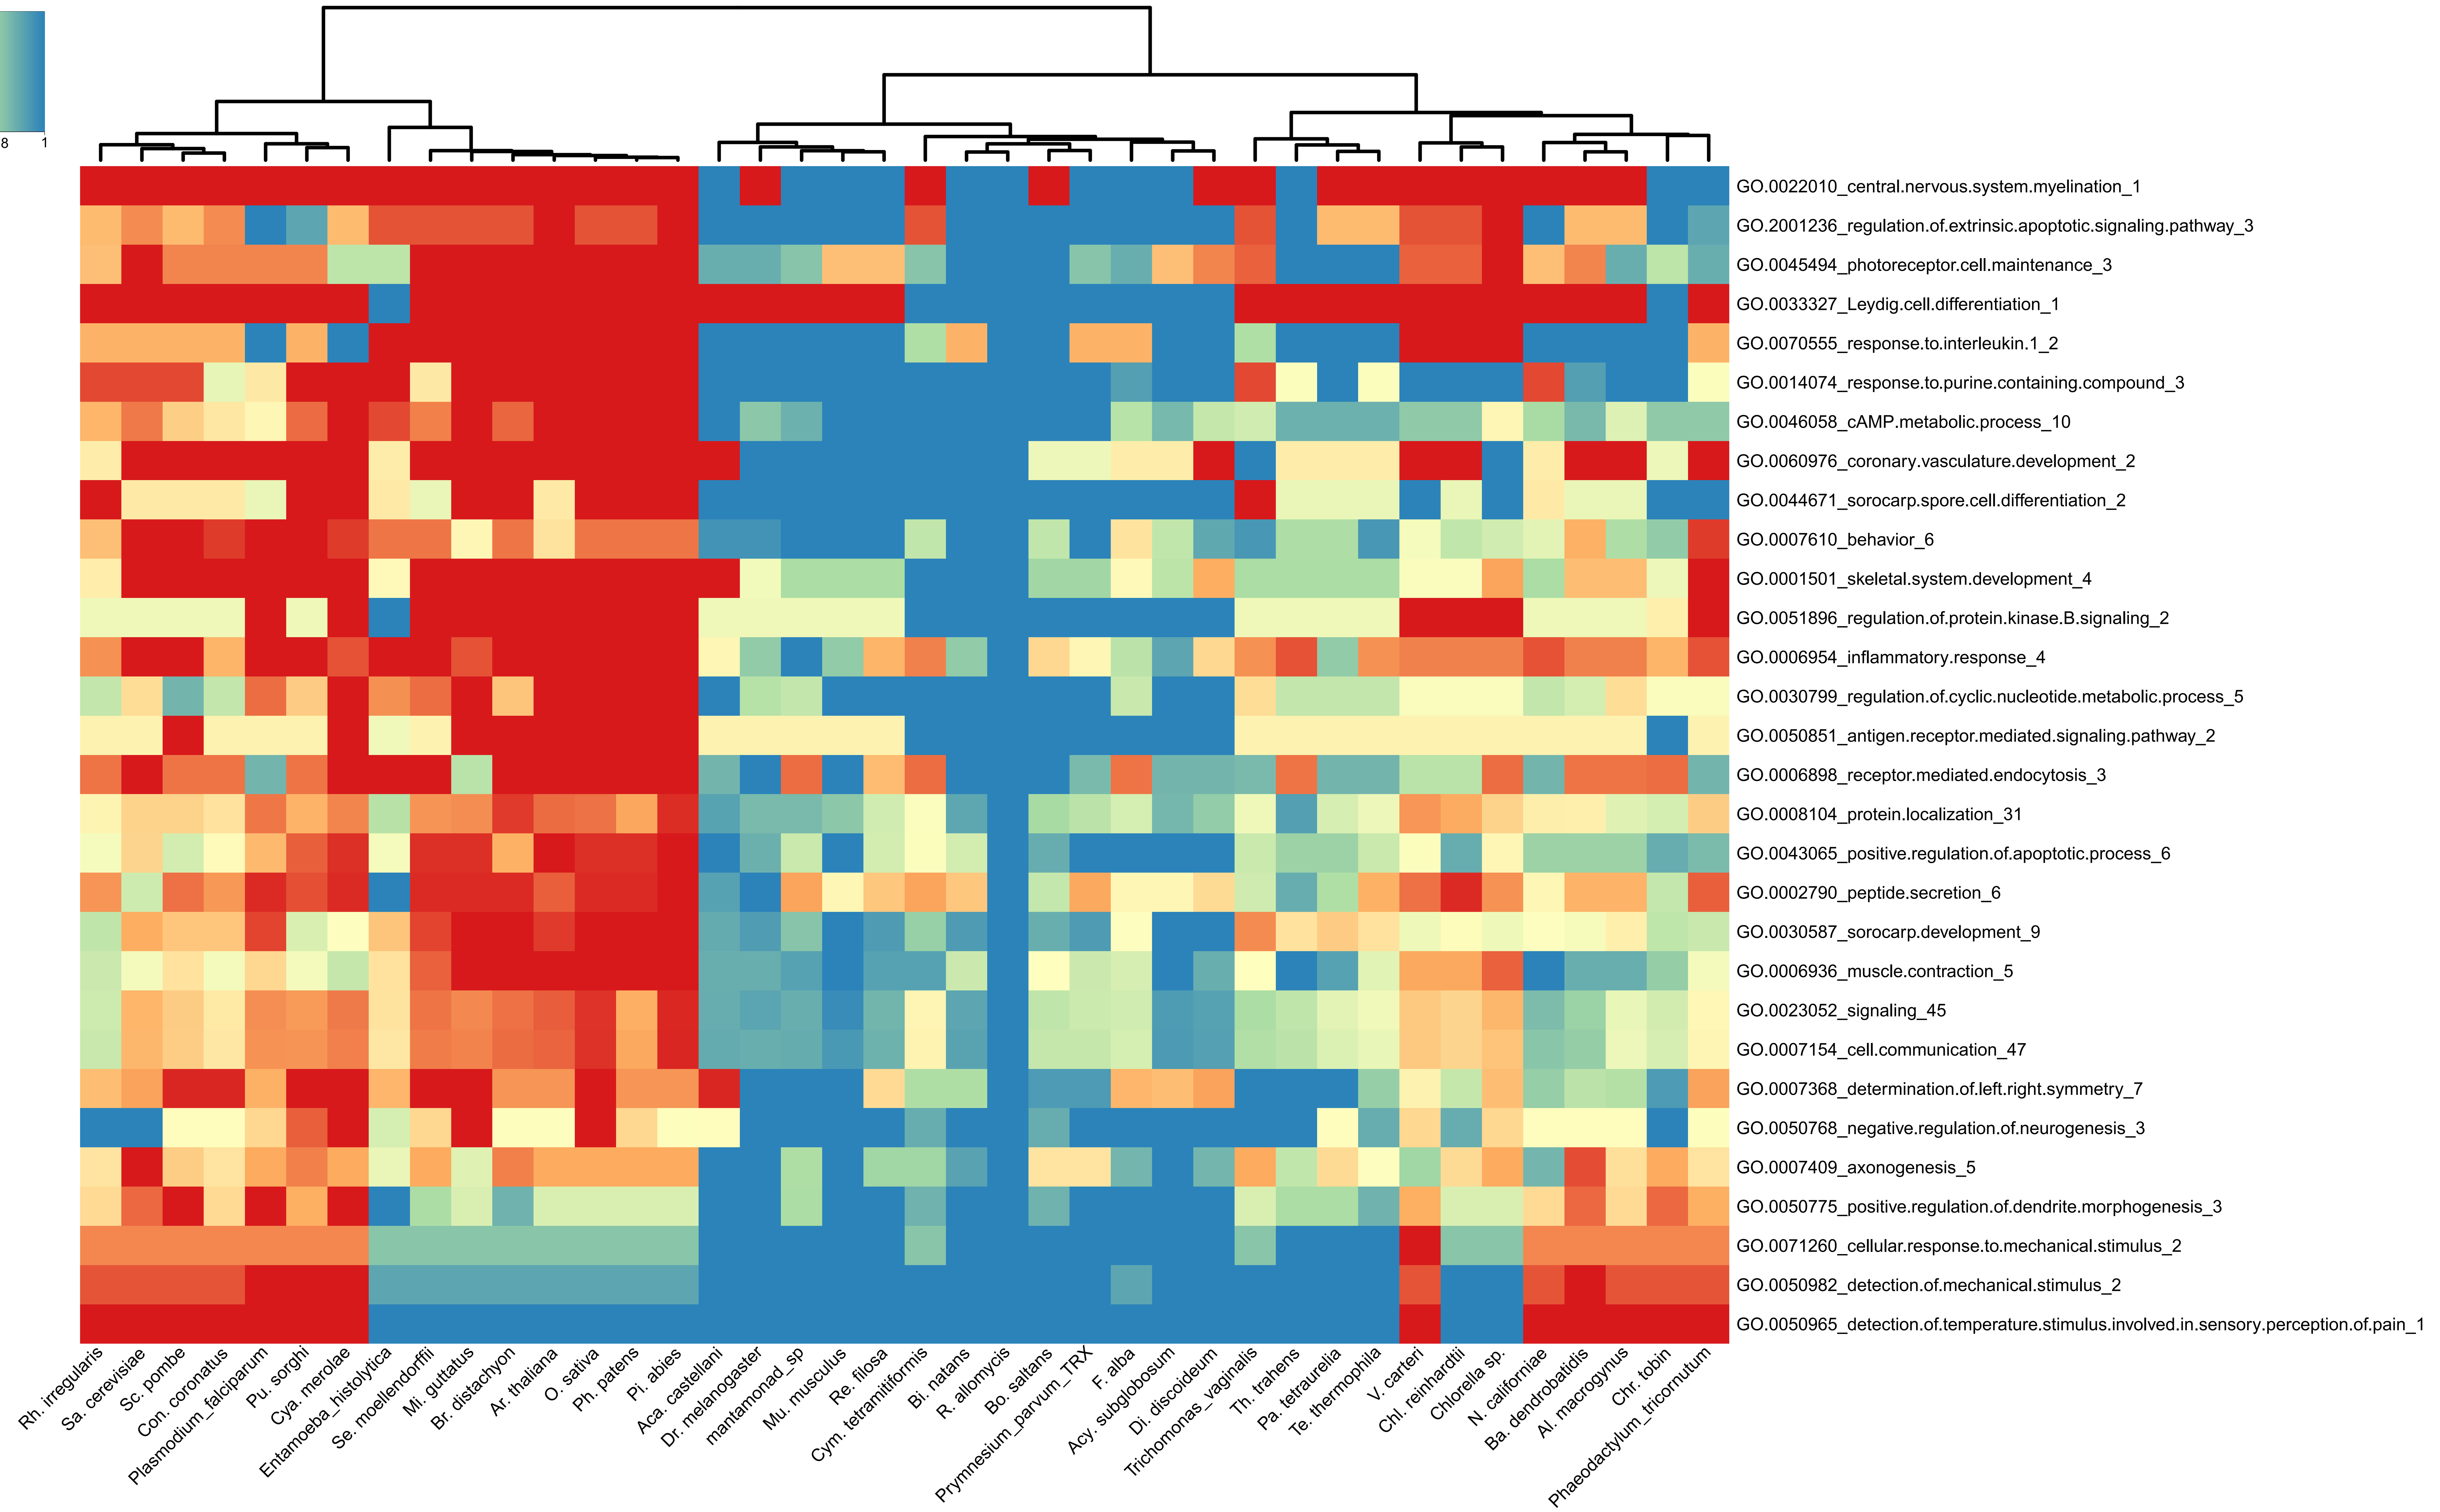

Supplement: 41559_2018_477_MOESM9_ESM.pdf [file 41559_2018_477_MOESM9_ESM.pdf]
